# Supplementary material for: Sedation strategy and ICU delirium: a multicentre, population-based propensity score-matched cohort study
Source: PubMed Central journal article supplement — BMJ Open. 2021 Jul 20;11(7):e045087. doi: 10.1136/bmjopen-2020-045087 (PMC8292822; doi:10.1136/bmjopen-2020-045087), 2021-07-20
Supplement: bmjopen-2020-045087.draft_revisions.pdf [file bmjopen-2020-045087.draft_revisions.pdf]

# BMJ Open

BMJ Open is committed to open peer review. As part of this commitment we make the peer review history of every article we publish publicly available.

When an article is published we post the peer reviewers' comments and the authors' responses online. We also post the versions of the paper that were used during peer review. These are the versions that the peer review comments apply to.

The versions of the paper that follow are the versions that were submitted during the peer review process. They are not the versions of record or the final published versions. They should not be cited or distributed as the published version of this manuscript.

BMJ Open is an open access journal and the full, final, typeset and author-corrected version of record of the manuscript is available on our site with no access controls, subscription charges or pay-per-view fees (<http://bmjopen.bmj.com>).

If you have any questions on BMJ Open's open peer review process please email [info.bmjopen@bmj.com](mailto:info.bmjopen@bmj.com)

# BMJ Open

## Sedation strategy and ICU Delirium: A multi-center, population-based propensity score-matched cohort study

|                               |                                                                                                                                                                                                                                                                                                                                                                                                                                                                                                                                                                                                                                                                                    |
|-------------------------------|------------------------------------------------------------------------------------------------------------------------------------------------------------------------------------------------------------------------------------------------------------------------------------------------------------------------------------------------------------------------------------------------------------------------------------------------------------------------------------------------------------------------------------------------------------------------------------------------------------------------------------------------------------------------------------|
| Journal:                      | <i>BMJ Open</i>                                                                                                                                                                                                                                                                                                                                                                                                                                                                                                                                                                                                                                                                    |
| Manuscript ID                 | bmjopen-2020-045087                                                                                                                                                                                                                                                                                                                                                                                                                                                                                                                                                                                                                                                                |
| Article Type:                 | Original research                                                                                                                                                                                                                                                                                                                                                                                                                                                                                                                                                                                                                                                                  |
| Date Submitted by the Author: | 22-Sep-2020                                                                                                                                                                                                                                                                                                                                                                                                                                                                                                                                                                                                                                                                        |
| Complete List of Authors:     | Casault, Colin; University of Calgary Cumming School of Medicine, Department of Critical Care Medicine<br>Soo, Andrea; University of Calgary Cumming School of Medicine, Critical Care Medicine<br>Lee, Chel; University of Calgary Cumming School of Medicine, Department of Critical Care<br>Couillard, Philippe; University of Calgary Cumming School of Medicine, Critical Care Medicine<br>Niven, Daniel; University of Calgary Cumming School of Medicine, Critical Care Medicine<br>Stelfox, Tom; University of Calgary Cumming School of Medicine, Department of Critical Care<br>Fiest, Kirsten; University of Calgary Cumming School of Medicine, Critical Care Medicine |
| Keywords:                     | Adult intensive & critical care < ANAESTHETICS, Health & safety < HEALTH SERVICES ADMINISTRATION & MANAGEMENT, Quality in health care < HEALTH SERVICES ADMINISTRATION & MANAGEMENT, Adult intensive & critical care < INTENSIVE & CRITICAL CARE, Delirium & cognitive disorders < PSYCHIATRY                                                                                                                                                                                                                                                                                                                                                                                      |
|                               |                                                                                                                                                                                                                                                                                                                                                                                                                                                                                                                                                                                                                                                                                    |

SCHOLARONE™  
Manuscripts

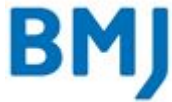

I, the Submitting Author has the right to grant and does grant on behalf of all authors of the Work (as defined in the below author licence), an exclusive licence and/or a non-exclusive licence for contributions from authors who are: i) UK Crown employees; ii) where BMJ has agreed a CC-BY licence shall apply, and/or iii) in accordance with the terms applicable for US Federal Government officers or employees acting as part of their official duties; on a worldwide, perpetual, irrevocable, royalty-free basis to BMJ Publishing Group Ltd ("BMJ") its licensees and where the relevant Journal is co-owned by BMJ to the co-owners of the Journal, to publish the Work in this journal and any other BMJ products and to exploit all rights, as set out in our [licence](#).

The Submitting Author accepts and understands that any supply made under these terms is made by BMJ to the Submitting Author unless you are acting as an employee on behalf of your employer or a postgraduate student of an affiliated institution which is paying any applicable article publishing charge ("APC") for Open Access articles. Where the Submitting Author wishes to make the Work available on an Open Access basis (and intends to pay the relevant APC), the terms of reuse of such Open Access shall be governed by a Creative Commons licence – details of these licences and which [Creative Commons](#) licence will apply to this Work are set out in our licence referred to above.

Other than as permitted in any relevant BMJ Author's Self Archiving Policies, I confirm this Work has not been accepted for publication elsewhere, is not being considered for publication elsewhere and does not duplicate material already published. I confirm all authors consent to publication of this Work and authorise the granting of this licence.

1  
2  
3  
4  
5  
6  
7  
8  
9  
10  
11 Sedation strategy and ICU Delirium: A multi-center, population-based propensity score-matched cohort study  
12

13 Colin Casault<sup>a</sup>, MD; Andrea Soo<sup>a</sup>, PhD; Chel Hee Lee, PhD; Philippe Couillard<sup>a</sup>, MD; Daniel J Niven<sup>a,b</sup>, MD/PhD;  
14 Tom Stelfox<sup>a,b</sup>, MD/PhD; Kirsten M. Fiest<sup>a,b,c</sup>, PhD.  
15

16  
17  
18 a: Department of Critical Care Medicine, University of Calgary and Alberta Health Services, Calgary Alberta,  
19 Canada.

20 b: Department of Community Health Sciences and O'Brien Institute for Public Health, University of Calgary,  
21 Calgary, Alberta, Canada

22 c: Department of Psychiatry and Hotchkiss Brain Institute, University of Calgary, Calgary, Alberta, Canada  
23

24 Address for Correspondence:

25 Colin Casault

26 Department of Critical Care, University of Calgary

27 Calgary, Alberta, Canada

28 T2N-1N4

29 (587) 432-6762

30 casaultc@gmail.com  
31

32  
33 Abstract: 291 words

34 Manuscript: 2988 Words

35 Tables: 2

36 Figures: 3  
37

38  
39 Conflicts of Interest: No author has a conflict of interest to declare.  
40

41 Keywords: Delirium, ICU sedation, fentanyl sedation, midazolam sedation  
42  
43  
44  
45  
46  
47  
48  
49  
50  
51  
52  
53  
54  
55  
56  
57  
58  
59  
60

1  
2  
3  
4  
5 **Objectives:** We examined the relationship between dominant sedation strategy, risk of delirium and patient-centred  
6 outcomes in adults admitted to intensive care units(ICUs).  
7

8 **Design:** Retrospective propensity matched cohort study.  
9

10 **Setting:** Mechanically-ventilated adults ( $\geq 18$  years) admitted to four Canadian hospital medical/surgical ICUs from  
11 2014 – 2016 in Calgary, Alberta, Canada.  
12

13 **Participants:** 2837 mechanically-ventilated adults ( $\geq 18$  years) requiring admission to a medical/surgical ICU were  
14 evaluated for the relationship between sedation strategy and delirium.  
15

16 **Interventions:** None.  
17

18 **Primary and secondary outcome measures:** The primary exposure was dominant sedation strategy, defined as the  
19 sedative infusion, including midazolam, propofol or fentanyl, with the longest duration prior to first delirium  
20 assessment. The primary outcome was 'ever delirium' identified using the Intensive Care Delirium Screening  
21 Checklist (ICDSC). Secondary outcomes included mortality, length of stay (LOS), duration of ventilation and  
22 number of days with delirium. We analyzed the cohort with two propensity score (patient characteristics and  
23 therapies received) matched cohorts (propofol vs. fentanyl and propofol vs. midazolam).  
24

25 **Results:** 2,837 patients (60.7% male; median age 57 years (interquartile range 43-68)) were considered for  
26 propensity matching. In propensity score-matched cohorts(propofol vs. midazolam, n=712; propofol vs. fentanyl,  
27 n=1,732), the odds of delirium were significantly higher with midazolam (odds ratio (OR) 1.46 (95% confidence  
28 interval(CI) 1.06-2.00)) and fentanyl (OR 1.22 (95% CI 1.00-1.48)) compared to propofol dominant sedation  
29 strategies. Dominant sedation strategy with midazolam and fentanyl were associated with longer duration of  
30 ventilation compared to propofol. Fentanyl was also associated with increased ICU mortality(OR 1.50 (1.07-2.12))  
31 ICU and hospital LOS compared to a propofol dominant sedation strategy.  
32

33 **Conclusions:** We identified a novel association between fentanyl dominant sedation strategies and increased risk of  
34 delirium, duration of mechanical ventilation, ICU LOS and hospital LOS. Midazolam dominant sedation strategies  
35 increased delirium risk and duration of mechanical ventilation.  
36

#### 37 **Article Summary:**

- 38 • We examine the effects of midazolam and fentanyl sedation strategies on delirium and patient centered
- 39 outcomes using a large cohort of general intensive care patients.
- 40 • To reduce bias, we used a propensity score matching process on a large database.
- 41 • One key limitation is secondary to the concurrent use of multiple overlapping sedation strategies which
- 42 may impact the results
- 43 • Based on the limitations and the nature of cohort studies, one should consider this study as hypothesis
- 44 generating.  
45  
46  
47  
48  
49  
50  
51  
52  
53  
54  
55  
56  
57  
58  
59  
60

### *Introduction:*

Delirium in critically ill patients is an acute confusional state marked by severe disorganization of cognition, fluctuating course, attentional deficit and awareness<sup>1</sup>. Older age, severity of illness, presence of mechanical ventilation, coma, and sedative medications place over 50% of ICU patients at risk for developing delirium<sup>2-6</sup>. Delirium in the ICU is common, and may prolong hospital stay, increase mortality risk and contribute to long term cognitive impairment<sup>7,8</sup>. With a burgeoning elderly population, ICU admission requiring mechanical ventilation is estimated to increase by 80% by 2026, therefore understanding potential contributors to delirium is paramount<sup>9,10</sup>.

Over-sedation in the ICU, with benzodiazepines in particular, may be harmful<sup>11,12</sup>. Prospective cohort and randomized controlled trials support shorter durations of mechanical ventilation, more rapid awakening, and equally effective sedation with propofol or dexmedetomidine compared to midazolam<sup>13-17</sup>. Similarly, a population-based study by Lonardo *et al.* demonstrated higher mortality, longer duration of mechanical ventilation and longer ICU length of stay (LOS) in patients managed with benzodiazepines compared to propofol<sup>11</sup>. Lonardo *et al.* postulated midazolam's mortality effect may be due to increased rates of delirium. Delirium is associated with mortality, and some evidence supports patients treated with benzodiazepines may demonstrate higher rates of delirium in the ICU<sup>8,13,18,19</sup>. However, the association between benzodiazepines and delirium is inconsistent<sup>6</sup>.

Sedation strategies often employ both a sedative, like propofol, and an analgesic, like fentanyl, simultaneously to achieve a desired effect. However, studies evaluating the clinical effects of these sedation strategies are lacking. Additional research is necessary to understand the effects of sedation strategies on delirium, hospital length of stay (LOS) and survival outcomes. Our study examined the relationship between dominant sedation strategy (continuously infused propofol, fentanyl, and/or midazolam), delirium and important patient-centred outcomes, in a multi-center population-based sample of mechanically-ventilated adults admitted to ICU.

### *Methods:*

This retrospective cohort study was reported in compliance with the Strengthening the Reporting of Observational Studies in Epidemiology (STROBE) statement<sup>20</sup> and approved by the conjoint health research ethics board at the University of Calgary (REB17-0389).

### *Study Setting & Population:*

We identified consecutive mechanical ventilated adults ( $\geq 18$  years) admitted to four medical-surgical ICUs in Calgary, Alberta, Canada between January 1, 2014, to June 30<sup>th</sup>, 2016. Patients were excluded if:

- 1) Their ICU electronic health data did not link to an appropriate inpatient (hospital) admission
- 2) They did not have any ICU admissions with at least 1 Intensive Care Delirium Screening Checklist (ICDSC) assessment (details described in the *Outcome Measures* section)
- 3) They were non-Alberta residents (to allow for mortality outcome follow-up post hospital discharge)
- 4) They did not receive at least 1 continuous infusion of midazolam, propofol or fentanyl prior to the first ICDSC assessment.
- 5) They were never invasively ventilated during their ICU stay.
- 6) They did not have a single dominant continuous infusion prior to the first ICDSC assessment (see definition of dominant sedation strategy in the *Exposure Measure* section below for further detail).

If the patient was readmitted to ICU more than once during the study period, then only the first admission with at least 1 ICDSC assessment was used. The ICUs are staffed by accredited intensive care physicians which provide mechanical ventilation, vasoactive medications, and invasive monitoring.

#### *Data sources:*

Study data was derived from three electronic databases<sup>21-23</sup>. eCritical Alberta, a database and electronic medical record, that prospectively captures detailed clinical and demographic information<sup>22</sup>. The discharge abstract database (DAD) captures data on all hospitalized patients, including admission date, discharge, survival status, and up to 25 diagnostic codes from the International Classification of Diseases, 10<sup>th</sup> revision, Canadian enhancement. Out of hospital deaths were obtained from Alberta Vital Statistics, which captures all deaths occurring in Alberta. Data from Alberta Vital Statistics was available up to December 30, 2017, which provided at least 18 months of follow-up from the ICU admission date.

#### *Exposures and Definitions:*

The main study exposure was dominant sedation strategy prior to the first ICDSC assessment. A sedation strategy was defined as a continuous analgo-sedative infusion limited to midazolam, fentanyl, and propofol. Infusions were selected based on a screening survey which demonstrated small populations utilizing alternative sedation strategies. There were seven possible combinations for the sedation strategy prior to the first ICDSC assessment: 1) propofol only, 2) fentanyl only, 3) midazolam only, 4) propofol and fentanyl, 5) propofol and

1  
2  
3 midazolam, 6) fentanyl and midazolam, and 7) all three agents. A high number of patients received more than 1  
4 agent, therefore we classified patients into a dominant sedation strategy, defined as the longest continuous duration  
5 of infusion prior to the first ICDSC assessment, which consists of three categories for the primary analyses. For  
6 example, if fentanyl was provided for the longest duration, fentanyl was considered the dominant sedation strategy.  
7 It is possible the patient could have received propofol or midazolam (or neither) for a duration less than fentanyl. If  
8 the patient received two agents for the same duration, the patient was excluded as no strategy was dominant. As  
9 sensitivity analyses, all seven possible combinations of the sedation strategy used prior to the first ICDSC  
10 assessment were considered.

#### 11 *Outcome Measures:*

12  
13 The primary outcome was categorized as ‘ever/never delirium’ during ICU admission compatible with  
14 previously established delirium outcome measures<sup>7</sup>. All ICU patients with a Richmond Agitation Sedation  
15 Scale(RASS)<sup>24</sup> score  $\geq -3$  were evaluated twice daily using the ICDSC tool<sup>25</sup> and received a protocolized sedation  
16 awakening trial. The ICDSC is a validated delirium assessment tool<sup>25</sup>. Ever delirium patients were those with an  
17 *ICDSC score*  $\geq 4$ ; never delirium were those with an *ICDSC score*  $< 4$ . Total number of days with an *ICDSC score*  $\geq 4$   
18 defined delirium duration. Duration of delirium (days) was examined in secondary analyses.

19  
20 Delirium motor subtypes were identified using the RASS, based on previously published criteria<sup>18</sup>, and  
21 associated positive ICDSC score of  $\geq 4$ . The scale is scored from -5 points (unarousable) to 0 points (calm) to +4  
22 points (combative), where scores between -3 to 0 indicate hypoactive delirium, scores between 1 to 3 indicate  
23 hyperactive delirium, and scores that fluctuate between hypoactive and hyperactive indicate mixed delirium. All  
24 ICDSC scores  $\geq 4$  were linked to the closest RASS score within 4 hours of charting. If there was no RASS score  
25 documented within 4 hours of the ICDSC score, the sub-type was considered “unable to be classified”. If there was a  
26 RASS score within 4 hours of the ICDSC score but the RASS was -5, -4 or +4, the sub-type was considered “unable  
27 to be assessed”. If at least 1 assessment indicated hypoactive delirium and at least 1 assessment indicated  
28 hyperactive delirium the sub-type was considered mixed for that specific patient.

29  
30 Secondary outcomes were mortality in the ICU and hospital, duration of mechanical ventilation, and ICU &  
31 hospital lengths of stay (LOS). Patient mortality was also reported at 30-days and 1-year. Duration of invasive  
32 mechanical ventilation was defined as the time a patient required the use of invasive ventilator.

#### 33 *Statistical Analysis:*



1  
2  
3 Baseline characteristics were summarized using median with interquartile range (IQR) and frequency with  
4 percent and compared between sedation strategies using chi-squared tests and Kruskal-Wallis rank sum tests, as  
5 appropriate. For the primary outcome analysis, logistic regression was used to assess the association between  
6 dominant sedation strategy (propofol vs midazolam vs fentanyl) and risk of developing delirium. The relationship  
7 between dominant sedation strategy and delirium duration was analyzed using negative binomial models. The  
8 relationship between dominant sedation strategy and mortality outcomes were analyzed using logistic regression  
9 models. The relationship between dominant sedation strategy and LOS outcomes (ICU and hospital) were analyzed  
10 using linear regression models with a log-transformation of ICU LOS and hospital LOS. Primary analyses for all  
11 outcomes were based on forming two propensity score-matched cohorts: 1) propofol vs fentanyl and 2) propofol vs  
12 midazolam. Propensity scores were based on age, sex, reason for admission to ICU, Charlson comorbidity category  
13 (0, 1, 2+), admission APACHE II score, use of vasoactive medications and use of continuous renal replacement  
14 therapy. The cohorts were formed based on 1:1 nearest-neighbor matching without replacement using the logit of the  
15 propensity score and specified caliper width equal to 0.2 of the standard deviation of the logit of the propensity  
16 score<sup>26</sup>. Sensitivity analyses were based on the full cohort with models adjusted a priori for the same patient  
17 characteristics used in the propensity scores. The above analyses were repeated for the 7-category sedation strategy  
18 prior to the first ICDSC assessment. For these analyses, we formed six pairwise propensity score-matched cohorts  
19 similar to the primary analyses, matching with patients on propofol only for each of the other 6 categories of  
20 sedation strategy prior to the first ICDSC assessment. A two-sided p-value < 0.05 was considered statistically  
21 significant. Analyses were conducted in R, version 3.5.1.<sup>27</sup> Propensity-score matching was performed using the R  
22 package “MatchIt”, version 3.0.2.

#### 41 *Results:*

42  
43 There were 2,837 patients in the study cohort (Figure 1). For those receiving propofol dominant sedation, it  
44 was common to receive a single agent (62.8%). While with fentanyl (14.8%) and midazolam dominant sedation  
45 strategies (34.8%) single agent use was less common. Most patients were male (60.7%) with a median age of 57  
46 (IQR 43-68) years and admitted for a medical reason (50.4%). The median Charlson comorbidity score was 1 (IQR  
47 0-2), admission SOFA score 7 (IQR 4-9) and admission APACHE II score 19 (IQR 14-25). Patients who received a  
48 midazolam dominant sedation strategy were more likely admitted for medical reasons (72.8%) and had higher  
49 Charlson comorbidity scores, admission SOFA scores and admission APACHE II scores than those receiving  
50  
51  
52  
53  
54  
55  
56  
57  
58  
59  
60

propofol and fentanyl dominant sedation strategies. Patients receiving midazolam dominant strategies were also more likely to receive vasoactive medications (68.8%) compared to those predominantly receiving propofol (45.3%) and fentanyl dominant sedation strategies (64.5%). (Table 1)

Due to missing patient characteristics for 5 patients (0.2%), propensity scores were calculated for 1,409 patients receiving propofol dominant strategies, 1,067 patients receiving fentanyl dominant sedation strategies and 356 patients receiving midazolam dominant sedation strategies. Of the patients receiving fentanyl dominant sedation strategies, 201 (18.8%) could not be matched to a patient receiving propofol dominant sedation strategies within the specified caliper width of 0.2; therefore, this resulted in a matched cohort for propofol and fentanyl of 1,732 patients. Of the patients receiving midazolam dominant sedation strategies, all 356 patients could be matched to a patient receiving propofol dominant sedation strategies; therefore, this resulted in a matched cohort for patients with propofol and midazolam dominant sedation strategies of 712 patients. After matching, the baseline characteristics were balanced (Table 1).

In the propensity score-matched cohorts, there was a statistically significant association between delirium and midazolam dominant (odds ratio [OR] 1.46 (95% confidence interval 1.06-2.00);  $p=0.02$ ) as well as fentanyl dominant (OR 1.22 (95% CI 1.00-1.48);  $p=0.05$ ) sedation strategies compared to propofol dominant sedation strategies (Figure 2). Sensitivity analyses based on the 7-category sedation strategy prior to the first ICDSC assessment showed an increased odds of delirium for those on more than one agent compared to those on propofol only (Table 2). Among those who ever experienced delirium, the distribution of delirium subtypes was similar between dominant sedation strategies (Table 3). Based on the propensity score-matched cohorts, a fentanyl dominant sedation strategy was associated with longer duration of mechanical ventilation, longer ICU and hospital LOS and more delirium days compared to a propofol dominant sedation strategy, while a midazolam dominant sedation strategy was associated with a longer duration of mechanical ventilation compared to a propofol dominant sedation strategy (Figure 3). Sensitivity analyses of the secondary outcomes based on the 7-category sedation strategy can be found in the supplementary results (Supplementary Digital Content - Table 1). There was a statistically significant association between fentanyl dominant sedation strategy and ICU (OR=1.50 (1.07-2.12)) and 30-day mortality (OR=1.35 (1.02-1.79)) in propensity score-matched analyses (Supplementary Digital Content - Table 2).

*Discussion:*

1  
2  
3 Sedative strategy may increase the risk of adverse patient complications such as delirium, or prolonged  
4 mechanical ventilation. We found a midazolam dominant sedation strategy was associated with increased risk of  
5 developing delirium, and duration of mechanical ventilation, however was not associated with mortality.  
6  
7 Conversely, fentanyl was associated with multiple detrimental outcomes including increased risk of ICU & hospital  
8 LOS and duration of mechanical ventilation while the associations with delirium and mortality appeared  
9 inconsistent. Regardless, these results should advise clinicians to be cautious when selecting their sedation strategy.  
10  
11

12  
13  
14 The association between benzodiazepine-based sedation strategies and delirium has been suggested in prior  
15 literature<sup>8 17 18</sup>. The importance of these findings should not be understated as patients with delirium suffer  
16 prolonged hospital stays, an increased risk of mortality and long term cognitive impairment<sup>7 8</sup>. Sedation using  
17 multiple agents also increased delirium risk, duration of mechanical ventilation, ICU LOS and hospital LOS.  
18 Whether these effects are a direct result from the sedation strategy, or from the resulting delirium are unclear.  
19 Therefore, avoiding benzodiazepine dominant and multi-agent sedation strategies may minimize delirium risk.  
20  
21

22  
23  
24 We also re-confirmed the association between midazolam dominant sedation strategies and longer  
25 mechanical ventilation but not mortality as reported by Lonardo *et al.*<sup>11</sup>. The mechanism that benzodiazepines would  
26 increase mortality is unclear, however prolonged mechanical ventilation is a known risk factor for mortality<sup>28</sup>. A  
27 meta-analysis by Ho *et al.* comparing propofol to other sedation strategies did not demonstrate an impact on  
28 mortality; however, it did not specifically look at midazolam compared to other benzodiazepines<sup>29</sup>. The heterogeneity  
29 in mortality outcomes may be attributable to variation in sedation depth, as early deep sedation is an independent  
30 predictor of delayed time to extubation and long term mortality<sup>12</sup>. Therefore, not only agent choice but also sedation  
31 depth might contribute to the variation in mortality risk observed with benzodiazepines.  
32  
33

34  
35  
36 Sedation with midazolam and fentanyl is often selected for patients with significant hemodynamic  
37 instability to avoid the negative inotropic and vasodilatory effects of propofol. In our study, those receiving  
38 midazolam dominant sedation strategies demonstrated significantly higher SOFA scores, APACHE II scores on  
39 admission and were more likely to receive vasoactive medications and continuous renal replacement. All of these  
40 may impact mortality when unaccounted for and may explain the heterogeneity observed in the literature<sup>30</sup>. For  
41 example, Lonardo *et al.* did not control for the presence of renal replacement which has been associated with a high  
42 rate of mortality in critically ill patients<sup>11 31</sup>. Our use of detailed clinical data for risk adjustment may help explain  
43 the differences in mortality compared to prior reports.  
44  
45  
46  
47  
48  
49  
50  
51  
52  
53  
54  
55  
56  
57  
58  
59  
60

1  
2  
3 A fentanyl dominant sedation strategy was significantly associated with increased ICU LOS, hospital LOS  
4 and duration of mechanical ventilation. Prior literature shows associations with delayed extubation when given in  
5 the first 48 hours, which would support our findings<sup>12</sup>. What is unclear is whether our result is a direct effect of  
6 fentanyl or a synergistic combination of both fentanyl and midazolam. Moreover, fentanyl dominant strategies were  
7 associated with increased risk of ICU mortality, 30-day mortality, and at hospital discharge but not 1 year. It is  
8 difficult to know what to make of these observations. The relationship between fentanyl use and ICU mortality has  
9 been incompletely explored in the literature. The mortality risk associated with fentanyl use may be attributable to  
10 prolongations in mechanical ventilation<sup>28</sup>. In our data, the effect of mortality appeared strongest in those receiving  
11 only fentanyl and was less robust when used in combination. Another possibility could be the immunomodulatory  
12 effects of narcotics. The mu-opioid receptor is expressed on macrophages and T-lymphocytes, and chronic  
13 administration may increase the risk of bacterial infection<sup>32-34</sup>. Therefore, large doses of fentanyl may contribute to  
14 further immune dysregulation thereby placing critically ill patients at risk of infection. A final possibility is the use  
15 of fentanyl in the provision of palliative symptom control, therefore the mortality association is a marker of this  
16 practice. Further study is required to better delineate the true nature of the association between fentanyl and  
17 deleterious patient outcomes in the ICU.

18  
19  
20 Our studies strength is our large cohort size supported by granular patient detail extracted from a  
21 prospectively collected, clinical database representing multiple ICUs and the covariates were rigorously controlled  
22 using a propensity matched model<sup>22</sup>. The multicenter study design provides a pragmatic view of how sedation  
23 strategies are utilized in clinical practice. Limitations of our study include the possibility of confounding bias due to  
24 unmeasured impactful covariates or confounding by indication. Patients receiving midazolam dominant strategies  
25 were clearly more critically ill compared to those receiving propofol dominant strategies manifest by higher  
26 APACHE II scores, greater vasopressor requirements, and higher rates of renal replacement. To compensate, we  
27 conducted propensity score-matched analyses adjusted for known covariates. Additionally, fentanyl and midazolam  
28 are often used concurrently. Clearly teasing apart the isolated effects of each medication may be challenging.  
29 Adjustment with our statistical model should minimize this effect, however randomized controlled trials would  
30 better assess this limitation. Moreover, we focused primarily on the presence or absence of continuous infusions and  
31 did not quantify the impact of independent drug boluses. However, this effect would lessen the association with our  
32 primary outcome suggesting our observed associations are conservative. Another limitation is the use of drug

1  
2  
3 duration as a surrogate for the impact of the sedation strategy rather than in vivo plasma concentrations. Patient  
4 factors may impact midazolam metabolism due to differences in age, hepatic or renal dysfunction or co-  
5 administration of medications with similar metabolic pathways<sup>35-37</sup>. Finally, the definition of dominant sedation  
6 strategy based on longest duration of infusion prior to first ICDSC may be considered arbitrary. However, defining  
7 sedation in the setting of multiple agents has been incompletely explored in the literature, therefore novel definitions  
8 are required. Our data closely reflects multiple findings previously reported with both midazolam and fentanyl  
9 sedation. This reduces the possibility our findings are pure chance.  
10  
11  
12  
13  
14  
15

16 *Conclusion:*

17  
18 This multi-center, propensity score-matched cohort study demonstrates a novel association between fentanyl  
19 dominant sedation strategies and negative outcomes in the ICU. Fentanyl dominant sedation strategies were  
20 associated with increased risk of delirium, duration of ventilation, ICU LOS and hospital LOS. We also confirmed  
21 previous reports including an increased risk of delirium and duration of mechanical ventilation with midazolam  
22 dominant sedation strategies. This study highlights the need for additional research to further evaluate potentially  
23 negative effects of fentanyl and midazolam based sedation strategies.  
24  
25  
26  
27  
28  
29  
30  
31

32 Sources of Funding:

33  
34 This project was unfunded.  
35  
36  
37

38 Disclosures:

39 The authors have no conflicts of interest.  
40  
41  
42

43 Patient & Public Involvement:

44 No patient involved.  
45  
46  
47  
48

49 Acknowledgements:

50  
51 The authors would like to thank the Hotchkiss Brain institute, the O'Brien Institute for Public Health, and the  
52 University of Calgary Departments of Critical Care, Community Health Sciences and Psychiatry for their on-going  
53 support. Moreover, we would like to thank the reviewers and editorial team for their hard work and consideration.  
54  
55  
56  
57  
58  
59  
60

## References:

1. Association AP. Diagnostic and Statistical Manual of Mental Disorders(DSM-5). Arlington, VA: American Psychiatric Association 2013.
2. Ely EW, Inouye SK, Bernard GR, et al. Delirium in mechanically ventilated patients: validity and reliability of the confusion assessment method for the intensive care unit (CAM-ICU). *JAMA* 2001;286(21):2703-10.
3. Dubois MJ, Bergeron N, Dumont M, et al. Delirium in an intensive care unit: a study of risk factors. *Intensive Care Med* 2001;27(8):1297-304.
4. Pandharipande P, Cotton BA, Shintani A, et al. Prevalence and risk factors for development of delirium in surgical and trauma intensive care unit patients. *J Trauma* 2008;65(1):34-41. doi: 10.1097/TA.0b013e31814b2c4d
5. Girard TD, Kress JP, Fuchs BD, et al. Efficacy and safety of a paired sedation and ventilator weaning protocol for mechanically ventilated patients in intensive care (Awakening and Breathing Controlled trial): a randomised controlled trial. *Lancet* 2008;371(9607):126-34. doi: 10.1016/S0140-6736(08)60105-1
6. Zaal IJ, Devlin JW, Peelen LM, et al. A systematic review of risk factors for delirium in the ICU. *Crit Care Med* 2015;43(1):40-7. doi: 10.1097/CCM.0000000000000625
7. Thomason JW, Shintani A, Peterson JF, et al. Intensive care unit delirium is an independent predictor of longer hospital stay: a prospective analysis of 261 non-ventilated patients. *Crit Care* 2005;9(4):R375-81. doi: 10.1186/cc3729
8. Ely E, Shintani A, Truman B, et al. Delirium as a predictor of mortality in mechanically ventilated patients in the intensive care unit. *JAMA* 2004;291(14):1753-62.
9. Needham DM, Bronskill SE, Calinawan JR, et al. Projected incidence of mechanical ventilation in Ontario to 2026: Preparing for the aging baby boomers. *Crit Care Med* 2005;33(3):574-9.
10. Jacobs P, Noseworthy TW. National estimates of intensive care utilization and costs: Canada and the United States. *Crit Care Med* 1990;18(11):1282-6.
11. Lonardo NW, Mone MC, Nirula R, et al. Propofol is associated with favorable outcomes compared with benzodiazepines in ventilated intensive care unit patients. *Am J Respir Crit Care Med* 2014;189(11):1383-94. doi: 10.1164/rccm.201312-2291OC
12. Shehabi Y, Bellomo R, Reade MC, et al. Early intensive care sedation predicts long-term mortality in ventilated critically ill patients. *Am J Respir Crit Care Med* 2012;186(8):724-31. doi: 10.1164/rccm.201203-0522OC
13. Riker RR, Shehabi Y, Bokesch PM, et al. Dexmedetomidine vs midazolam for sedation of critically ill patients: a randomized trial. *JAMA* 2009;301(5):489-99. doi: 10.1001/jama.2009.56
14. R B-v, Mar Sanchez-Soria M, Morales-Garcia C, et al. Prolonged sedation of critically ill patients with midazolam or propofol: impact on weaning and costs. *Crit Care Med* 1997;25(1):33-40.

15. Aitkenhead AR, Pepperman ML, Willatts SM, et al. Comparison of propofol and midazolam for sedation in critically ill patients. *Lancet* 1989;2(8665):704-9.
16. Chamorro C, de Latorre FJ, Montero A, et al. Comparative study of propofol versus midazolam in the sedation of critically ill patients: results of a prospective, randomized, multicenter trial. *Crit Care Med* 1996;24(6):932-9.
17. Barr J, Fraser GL, Puntillo K, et al. Clinical practice guidelines for the management of pain, agitation, and delirium in adult patients in the intensive care unit. *Crit Care Med* 2013;41(1):263-306. doi: 10.1097/CCM.0b013e3182783b72
18. Pandhairpande P, Shintani A, Peterson J, et al. Lorazepam is an independent risk factor for transitioning to delirium in intensive care unit patients. *Anesthesiology* 2006;104(1):21-26.
19. Cammarano WB, Pittet JF, Weitz S, et al. Acute withdrawal syndrome related to the administration of analgesic and sedative medications in adult intensive care unit patients. *Crit Care Med* 1998;26(4):676-84.
20. von Elm E, Altman DG, Egger M, et al. The Strengthening the Reporting of Observational Studies in Epidemiology (STROBE) statement: guidelines for reporting observational studies. *The Lancet* 2007;370(9596):1453-57. doi: 10.1016/s0140-6736(07)61602-x
21. Chiasson TC, Manns BJ, Stelfox HT. An economic evaluation of venous thromboembolism prophylaxis strategies in critically ill trauma patients at risk of bleeding. *PLoS Med* 2009;6(6):e1000098. doi: 10.1371/journal.pmed.1000098
22. Brundin-Mather R, Soo A, Zuege DJ, et al. Secondary EMR data for quality improvement and research: A comparison of manual and electronic data collection from an integrated critical care electronic medical record system. *J Crit Care* 2018;47:295-301. doi: 10.1016/j.jcrc.2018.07.021
23. Stelfox HT, Soo A, Niven DJ, et al. Assessment of the Safety of Discharging Select Patients Directly Home From the Intensive Care Unit: A Multicenter Population-Based Cohort Study. *JAMA Intern Med* 2018;178(10):1390-99. doi: 10.1001/jamainternmed.2018.3675
24. Sessler CN, Gosnell MS, Grap MJ, et al. The Richmond Agitation-Sedation Scale: validity and reliability in adult intensive care unit patients. *Am J Respir Crit Care Med* 2002;166(10):1338-44. doi: 10.1164/rccm.2107138
25. Bergeron N, Dubois MJ, Dumont M, et al. Intensive Care Delirium Screening Checklist: evaluation of a new screening tool. *Intensive Care Med* 2001;27(5):859-64.
26. Austin PC. Optimal caliper widths for propensity-score matching when estimating differences in means and differences in proportions in observational studies. *Pharm Stat* 2011;10(2):150-61. doi: 10.1002/pst.433
27. Team RC. R: A language and environment for statistical computing. . 2018
28. Feng Y, Amoateng-Adjepong Y, Kaufman D, et al. Age, duration of mechanical ventilation, and outcomes of patients who are critically ill. *Chest* 2009;136(3):759-64. doi: 10.1378/chest.09-0515
29. Ho KM, Ng JY. The use of propofol for medium and long-term sedation in critically ill adult patients: a meta-analysis. *Intensive Care Med* 2008;34(11):1969-79. doi: 10.1007/s00134-008-1186-5

- 1  
2  
3  
4  
5  
6  
7  
8  
9  
10  
11  
12  
13  
14  
15  
16  
17  
18  
19  
20  
21  
22  
23  
24  
25  
26  
27  
28  
29
30. Soo A, Zuege DJ, Fick GH, et al. Describing organ dysfunction in the intensive care unit: a cohort study of 20,000 patients. *Crit Care* 2019;23(1):186. doi: 10.1186/s13054-019-2459-9
31. Uchino S, Kellum JA, Bellomo R, et al. Acute renal failure in critically ill patients: a multinational, multicenter study. *JAMA* 2005;294(7):813-8. doi: 10.1001/jama.294.7.813
32. Risdahl JM, Khanna KV, Peterson PK, et al. Opiates and infection. *J Neuroimmunol* 1998;83(1-2):4-18.
33. Roy S, Loh HH. Effects of opioids on the immune system. *Neurochem Res* 1996;21(11):1375-86.
34. Roy S, Wang J, Kelschenbach J, et al. Modulation of immune function by morphine: implications for susceptibility to infection. *J Neuroimmune Pharmacol* 2006;1(1):77-89. doi: 10.1007/s11481-005-9009-8
35. Barr J, Zomorodi K, Bertaccini EJ, et al. A double-blind, randomized comparison of i.v. lorazepam versus midazolam for sedation of ICU patients via a pharmacologic model. *Anesthesiology* 2001;95(2):286-98.
36. Swart EL, Zuideveld KP, de Jongh J, et al. Comparative population pharmacokinetics of lorazepam and midazolam during long-term continuous infusion in critically ill patients. *Br J Clin Pharmacol* 2004;57(2):135-45.
37. Oldenhof H, de Jong M, Steenhoek A, et al. Clinical pharmacokinetics of midazolam in intensive care patients, a wide interpatient variability? *Clin Pharmacol Ther* 1988;43(3):263-9.

30  
31  
32  
33

Tables:

34  
35  
36  
37  
38  
39

**Table 1: Baseline Characteristics**

| Characteristic          | Overall cohort    |                   |                   | Dominant sedation strategy matched cohorts |                   |                                      |                  |
|-------------------------|-------------------|-------------------|-------------------|--------------------------------------------|-------------------|--------------------------------------|------------------|
|                         | Propofol (n=1412) | Fentanyl (n=1069) | Midazolam (n=356) | Propofol vs. Midazolam matched cohort      |                   | Propofol vs. Fentanyl matched cohort |                  |
|                         |                   |                   |                   | Propofol (n=356)                           | Midazolam (n=356) | Propofol (n=866)                     | Fentanyl (n=866) |
| Age, median (IQR)       | 56 (42-67)        | 59 (44-69)        | 59 (46-71)        | 58 (48-69)                                 | 59 (46-71)        | 57 (46-68)                           | 57 (42-69)       |
| Male, n (%)             | 843 (59.7)        | 656 (61.4)        | 223 (62.6)        | 227 (63.8)                                 | 223 (62.6)        | 533 (61.5)                           | 520 (60.0)       |
| Admission reason, n (%) |                   |                   |                   |                                            |                   |                                      |                  |
| Medical                 | 791 (56.0)        | 379 (35.5)        | 259 (72.8)        | 253 (71.1)                                 | 259 (72.8)        | 426 (49.2)                           | 379 (43.8)       |
| Surgical                | 265 (18.8)        | 405 (37.9)        | 69 (19.4)         | 74 (20.8)                                  | 69 (19.4)         | 256 (29.6)                           | 248 (28.6)       |
| Neurological            | 245 (17.4)        | 73 (6.8)          | 19 (5.3)          | 18 (5.1)                                   | 19 (5.3)          | 76 (8.8)                             | 73 (8.4)         |
| Trauma                  | 109 (7.7)         | 211 (19.7)        | 9 (2.5)           | 11 (3.1)                                   | 9 (2.5)           | 108 (12.5)                           | 166 (19.2)       |
| Location admitted from  |                   |                   |                   |                                            |                   |                                      |                  |

40  
41  
42  
43  
44  
45  
46  
47  
48  
49  
50  
51  
52  
53  
54  
55  
56  
57  
58  
59  
60



|                                             |                |                |                |               |            |               |               |
|---------------------------------------------|----------------|----------------|----------------|---------------|------------|---------------|---------------|
| Emergency Room                              | 833<br>(59.0%) | 413<br>(38.6%) | 190<br>(53.4%) | 202<br>(56.7) | 190 (53.4) | 441<br>(50.9) | 369<br>(42.6) |
| Operating Room/Recovery                     | 278<br>(19.7%) | 399<br>(37.3%) | 59 (16.6%)     | 63 (17.7)     | 59 (16.6)  | 232<br>(26.8) | 271<br>(31.3) |
| Hospital Ward                               | 254<br>(18.0%) | 209<br>(19.6%) | 91 (25.6%)     | 85 (23.9)     | 91 (25.6)  | 165<br>(19.1) | 180<br>(20.8) |
| Another Hospital                            | 26<br>(1.8%)   | 24 (2.2%)      | 7 (2.0%)       | 4 (1.1)       | 7 (2.0)    | 17 (2.0)      | 23 (2.7)      |
| Other                                       | 21<br>(1.5%)   | 24 (2.2%)      | 9 (2.5%)       | 2 (0.6)       | 9 (2.5)    | 11 (1.3)      | 23 (2.7)      |
| Charlson score, n (%)                       |                |                |                |               |            |               |               |
| 0                                           | 582<br>(41.2%) | 422<br>(39.5%) | 121<br>(34.0%) | 127<br>(35.7) | 121 (34.0) | 322<br>(37.2) | 336<br>(38.8) |
| 1                                           | 317<br>(22.5%) | 239<br>(22.4%) | 70 (19.7%)     | 61 (17.1)     | 70 (19.7)  | 201<br>(23.2) | 207<br>(23.9) |
| 2+                                          | 513<br>(36.3%) | 408<br>(38.2%) | 165<br>(46.3%) | 168<br>(47.2) | 165 (46.3) | 343<br>(39.6) | 323<br>(37.3) |
| Charlson score, median (IQR)                | 1 (0-2)        | 1 (0-2)        | 1 (0-3)        | 1 (0-3)       | 1 (0-3)    | 1 (0-3)       | 1 (0-2)       |
| Admission SOFA score, median (IQR)          | 6 (4-8)        | 7 (5-10)       | 8 (6-11)       | 8 (5-10)      | 8 (6-11)   | 7 (4-9)       | 7 (4-10)      |
| Admission APACHE II score, median (IQR)     | 18 (13-24)     | 19 (14-25)     | 23 (16-28)     | 21 (16-27)    | 23 (16-28) | 19 (14-24)    | 19 (13-26)    |
| Vasoactive medications, n (%)               | 639<br>(45.3%) | 690<br>(64.5%) | 245<br>(68.8%) | 241<br>(67.7) | 245 (68.8) | 526<br>(60.7) | 488<br>(56.4) |
| Continuous renal replacement therapy, n (%) | 59<br>(4.2%)   | 78 (7.3%)      | 33 (9.3%)      | 28 (7.9)      | 33 (9.3)   | 52 (6.0)      | 73 (8.4)      |

**Table 2: Sensitivity Analyses examining the relationship between delirium and individual sedation agents prior to first ICDS assessment**

| Sedation agent prior to first ICDS assessment | Overall Cohort     |                      |                                   | Matched cohorts              |                                                                 |                      |                                                                    |
|-----------------------------------------------|--------------------|----------------------|-----------------------------------|------------------------------|-----------------------------------------------------------------|----------------------|--------------------------------------------------------------------|
|                                               | Number of patients | Ever Delirium, n (%) | Adjusted OR (95% CI) <sup>1</sup> | Number of patients per group | Ever Delirium for propofol patients from matched cohorts, n (%) | Ever Delirium, n (%) | Propensity score-matched OR for Ever delirium(95% CI) <sup>2</sup> |
| Propofol                                      | 887                | 509 (57.4)           | 1.00 (reference group)            | N/A <sup>3</sup>             | N/A <sup>3</sup>                                                | N/A <sup>3</sup>     | 1.00 (reference group)                                             |
| Fentanyl                                      | 158                | 91 (57.6)            | 1.04 (0.71-1.52)                  | 152                          | 74 (48.7)                                                       | 87 (57.2)            | 1.23 (0.74-2.05)                                                   |
| Midazolam                                     | 124                | 77 (62.1)            | 1.11 (0.73-1.69)                  | 122                          | 69 (56.6)                                                       | 75 (61.5)            | 1.41 (0.90-2.22)                                                   |
| Propofol + Fentanyl                           | 854                | 543 (63.6)           | 1.32 (1.06-1.65)                  | 565                          | 323 (57.2)                                                      | 347 (61.4)           | 1.19 (0.94-1.51)                                                   |
| Propofol + Midazolam                          | 224                | 163 (72.8)           | 1.72 (1.23-2.43)                  | 223                          | 143 (64.1)                                                      | 162 (72.6)           | 1.49 (1.00-2.23)                                                   |
| Fentanyl + Midazolam                          | 222                | 160 (72.1)           | 1.72 (1.22-2.46)                  | 214                          | 119 (55.6)                                                      | 153 (71.5)           | 2.00 (1.34-3.00)                                                   |
| All 3                                         | 368                | 269 (73.1)           | 1.84 (1.38-2.47)                  | 335                          | 199 (59.4)                                                      | 241 (71.9)           | 1.75 (1.27-2.42)                                                   |

<sup>1</sup>Adjusted for age, sex, admission class, Charlson comorbidity category (0, 1, 2+), admission APACHE II score, vasoactive medications, continuous renal replacement therapy

<sup>2</sup>Propensity scores based on age, sex, admission class, Charlson comorbidity category (0, 1, 2+), admission APACHE II score, vasoactive medications, continuous renal replacement therapy. 1:1 nearest-neighbor pairwise (propofol vs. fentanyl and propofol vs. midazolam, etc.) matching without replacement using the logit of the propensity score and specified caliper width equal to 0.2 of the standard deviation of the logit of the propensity score

<sup>3</sup>The propofol group was used to form all 6 matched cohorts and therefore the number of patients and number (%) experiencing delirium for propofol varies for each comparison

**Table 3: Delirium subtype by dominant sedation strategy prior to first ICDS assessment among patients experiencing delirium for the propensity score-matched cohorts**

|                                     | <b>Dominant sedation strategy</b>                                   |                  |                                                                      |                   |
|-------------------------------------|---------------------------------------------------------------------|------------------|----------------------------------------------------------------------|-------------------|
|                                     | Propofol vs. Fentanyl matched cohort patients experiencing delirium |                  | Propofol vs. Midazolam matched cohort patients experiencing delirium |                   |
| <b>Delirium Subtype</b>             | Propofol (n=529)                                                    | Fentanyl (n=569) | Propofol (n=228)                                                     | Midazolam (n=257) |
| Hyperactive only, n (%)             | 47 (8.9)                                                            | 40 (7.0)         | 15 (6.6)                                                             | 25 (9.7)          |
| Hypoactive only, n (%)              | 210 (39.7)                                                          | 228 (40.1)       | 104 (45.6)                                                           | 106 (41.2)        |
| Mixed, n (%)                        | 254 (48.0)                                                          | 289 (50.8)       | 103 (45.2)                                                           | 123 (47.9)        |
| Unable to assess or classify, n (%) | 18 (3.4)                                                            | 12 (2.1)         | 6 (2.6)                                                              | 3 (1.2)           |

**Figure 1: Cohort diagram**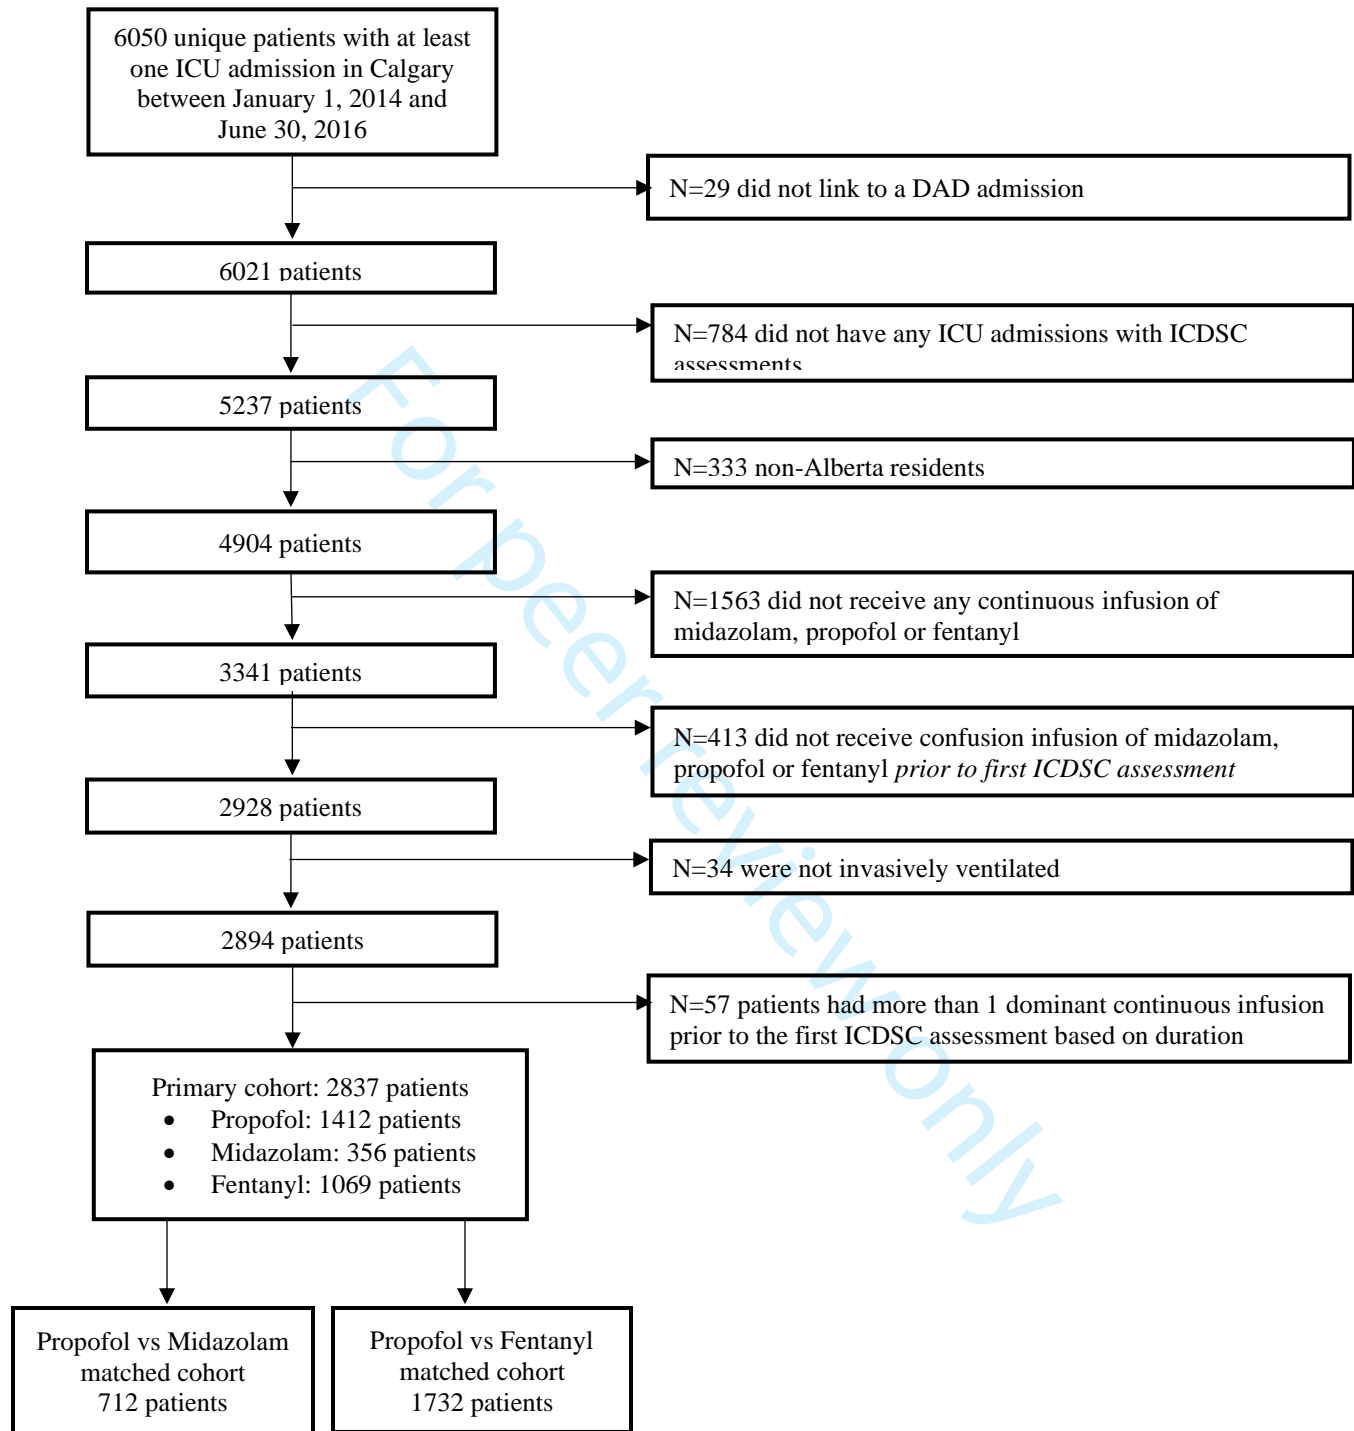

**Figure 2: Propensity score-matched odds ratios of delirium by dominant sedation strategy prior to first ICDS assessment**

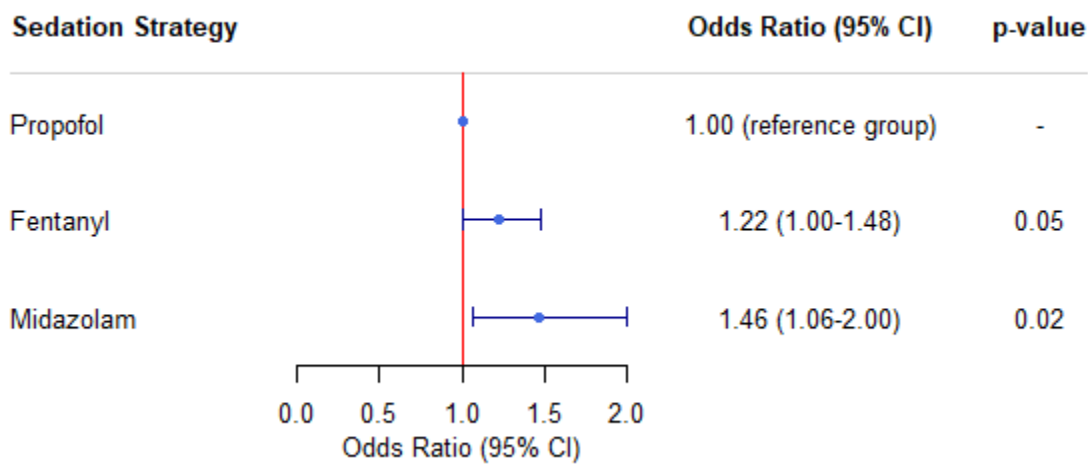

Peer review only

**Figure 3: Forest plot of propensity score-matched mean or rate ratios of secondary outcomes and sedation strategy**

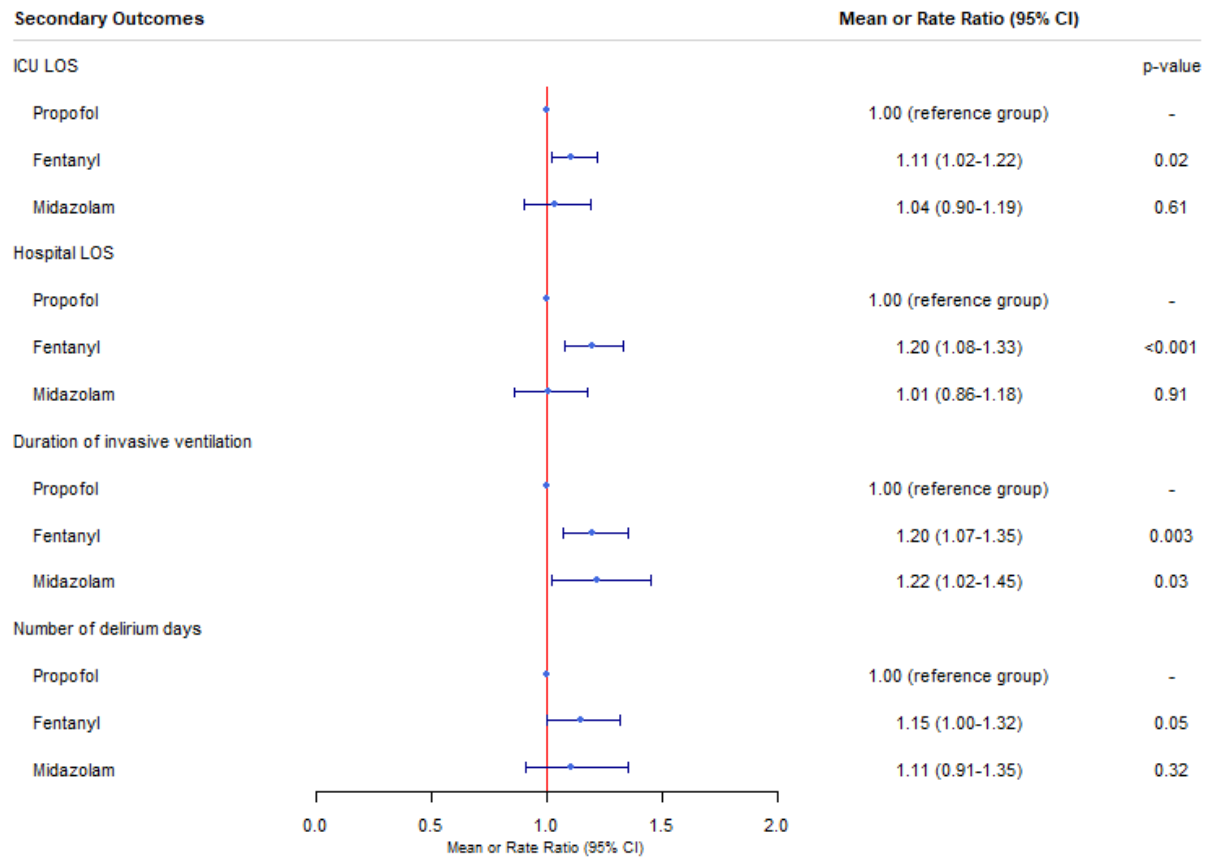

**Table S1: Secondary outcomes by sedation strategy prior to first ICDS assessment**

| <b>Propensity score-matched mean ratio or rate ratio (95% CI)<sup>1</sup></b> | <b>ICU LOS</b>          | <b>Hospital LOS</b>     | <b>Duration of invasive ventilation</b> | <b>Number of delirium days</b> |
|-------------------------------------------------------------------------------|-------------------------|-------------------------|-----------------------------------------|--------------------------------|
| Sedation prior to first ICDS assessment                                       |                         |                         |                                         |                                |
| Propofol                                                                      | 1.00 (reference group)  | 1.00 (reference group)  | 1.00 (reference group)                  | 1.00 (reference group)         |
| Fentanyl                                                                      | 1.06 (0.85-1.33)        | 1.25 (0.97-1.61)        | 1.00 (0.74-1.35)                        | 1.03 (0.69-1.55)               |
| Midazolam                                                                     | 0.83 (0.65-1.06)        | 0.98 (0.75-1.28)        | 1.00 (0.73-1.38)                        | 0.88 (0.59-1.31)               |
| Propofol + Fentanyl                                                           | <b>1.17 (1.05-1.30)</b> | <b>1.20 (1.05-1.38)</b> | <b>1.37 (1.18-1.58)</b>                 | 1.08 (0.90-1.31)               |
| Propofol + Midazolam                                                          | 1.16 (0.99-1.36)        | 0.86 (0.68-1.08)        | <b>1.59 (1.28-1.99)</b>                 | 1.11 (0.87-1.41)               |
| Fentanyl + Midazolam                                                          | <b>1.40 (1.17-1.67)</b> | <b>1.27 (1.02-1.57)</b> | <b>1.95 (1.54-2.46)</b>                 | 1.28 (0.97-1.69)               |
| All 3                                                                         | <b>1.73 (1.52-1.98)</b> | <b>1.39 (1.18-1.63)</b> | <b>2.47 (2.06-2.97)</b>                 | <b>1.35 (1.10-1.67)</b>        |

<sup>1</sup>Propensity score based on age, sex, admission class, Charlson comorbidity category (0, 1, 2+), admission APACHE II score, vasoactive medications, continuous renal replacement therapy. 1:1 nearest-neighbor matching without replacement using the logit of the propensity score and specified caliper width equal to 0.2 of the standard deviation of the logit of the propensity score

**Table S2: Propensity score matched models of the relationship between mortality outcomes and dominant sedation strategy prior to first ICDSC assessment**

| Outcome                              | Dominant Sedation Strategy | Mortality, n (%) | Propensity score-matched OR (95% CI) <sup>2</sup> |
|--------------------------------------|----------------------------|------------------|---------------------------------------------------|
| ICU Mortality                        | Propofol                   | 94 (6.7)         | 1.00 (reference)                                  |
|                                      | Fentanyl                   | 104 (9.7)        | <b>1.50 (1.07-2.12)</b>                           |
|                                      | Midazolam                  | 39 (11.0)        | 1.20 (0.74-1.97)                                  |
| Hospital Mortality                   | Propofol                   | 157 (11.1)       | 1.00 (reference)                                  |
|                                      | Fentanyl                   | 166 (15.5)       | 1.27 (0.97-1.67)                                  |
|                                      | Midazolam                  | 59 (16.6)        | 1.14 (0.76-1.70)                                  |
| Died within 30 days of ICU admission | Propofol                   | 148 (10.5)       | 1.00 (reference)                                  |
|                                      | Fentanyl                   | 148 (13.8)       | <b>1.35 (1.02-1.79)</b>                           |
|                                      | Midazolam                  | 50 (14.0)        | 1.02 (0.67-1.57)                                  |
| Died within 1 year of ICU admission  | Propofol                   | 268 (19.0)       | 1.00 (reference)                                  |
|                                      | Fentanyl                   | 248 (23.2)       | 1.13 (0.90-1.43)                                  |
|                                      | Midazolam                  | 91 (25.6)        | 1.01 (0.72-1.42)                                  |

STROBE Statement—Checklist of items that should be included in reports of *cohort studies*

|                           | Item No | Recommendation                                                                                                                                                                                                                                                                                                         | Page No               |
|---------------------------|---------|------------------------------------------------------------------------------------------------------------------------------------------------------------------------------------------------------------------------------------------------------------------------------------------------------------------------|-----------------------|
| <b>Title and abstract</b> | 1       | (a) Indicate the study's design with a commonly used term in the title or the abstract<br>(b) Provide in the abstract an informative and balanced summary of what was done and what was found                                                                                                                          | 1, 2                  |
| <b>Introduction</b>       |         |                                                                                                                                                                                                                                                                                                                        |                       |
| Background/rationale      | 2       | Explain the scientific background and rationale for the investigation being reported                                                                                                                                                                                                                                   | 3                     |
| Objectives                | 3       | State specific objectives, including any prespecified hypotheses                                                                                                                                                                                                                                                       | 3                     |
| <b>Methods</b>            |         |                                                                                                                                                                                                                                                                                                                        |                       |
| Study design              | 4       | Present key elements of study design early in the paper                                                                                                                                                                                                                                                                | 4                     |
| Setting                   | 5       | Describe the setting, locations, and relevant dates, including periods of recruitment, exposure, follow-up, and data collection                                                                                                                                                                                        | 4                     |
| Participants              | 6       | (a) Give the eligibility criteria, and the sources and methods of selection of participants. Describe methods of follow-up<br>(b) For matched studies, give matching criteria and number of exposed and unexposed                                                                                                      | 4                     |
| Variables                 | 7       | Clearly define all outcomes, exposures, predictors, potential confounders, and effect modifiers. Give diagnostic criteria, if applicable                                                                                                                                                                               | 5,6                   |
| Data sources/measurement  | 8*      | For each variable of interest, give sources of data and details of methods of assessment (measurement). Describe comparability of assessment methods if there is more than one group                                                                                                                                   | 4, 6                  |
| Bias                      | 9       | Describe any efforts to address potential sources of bias                                                                                                                                                                                                                                                              | 6                     |
| Study size                | 10      | Explain how the study size was arrived at                                                                                                                                                                                                                                                                              | 5                     |
| Quantitative variables    | 11      | Explain how quantitative variables were handled in the analyses. If applicable, describe which groupings were chosen and why                                                                                                                                                                                           | 4,6                   |
| Statistical methods       | 12      | (a) Describe all statistical methods, including those used to control for confounding<br>(b) Describe any methods used to examine subgroups and interactions<br>(c) Explain how missing data were addressed<br>(d) If applicable, explain how loss to follow-up was addressed<br>(e) Describe any sensitivity analyses | 6, Supplement methods |
| <b>Results</b>            |         |                                                                                                                                                                                                                                                                                                                        |                       |
| Participants              | 13*     | (a) Report numbers of individuals at each stage of study—eg numbers potentially eligible, examined for eligibility, confirmed eligible, included in the study, completing follow-up, and analysed<br>(b) Give reasons for non-participation at each stage<br>(c) Consider use of a flow diagram                        | 7, Figure 1           |
| Descriptive data          | 14*     | (a) Give characteristics of study participants (eg demographic, clinical, social) and information on exposures and potential confounders<br>(b) Indicate number of participants with missing data for each variable of interest<br>(c) Summarise follow-up time (eg, average and total amount)                         | 4, 7 Table 1          |
| Outcome data              | 15*     | Report numbers of outcome events or summary measures over time                                                                                                                                                                                                                                                         | 7 Table 2, 3,         |



1  
2  
3  
4  
5  
6  
7  
8  
9  
10  
11  
12  
13  
14  
15  
16  
17  
18  
19  
20  
21  
22  
23  
24  
25  
26  
27  
28  
29  
30  
31  
32  
33  
34  
35  
36  
37  
38  
39  
40  
41  
42  
43  
44  
45  
46  
47  
48  
49  
50  
51  
52  
53  
54  
55  
56  
57  
58  
59  
60

For peer review only

|    |                          |    |                                                                                                                                                                                                              |           |
|----|--------------------------|----|--------------------------------------------------------------------------------------------------------------------------------------------------------------------------------------------------------------|-----------|
| 1  | Main results             | 16 | (a) Give unadjusted estimates and, if applicable, confounder-adjusted estimates and their precision (eg, 95% confidence interval). Make clear which confounders were adjusted for and why they were included | Table 2,3 |
| 2  |                          |    | (b) Report category boundaries when continuous variables were categorized                                                                                                                                    |           |
| 3  |                          |    | (c) If relevant, consider translating estimates of relative risk into absolute risk for a meaningful time period                                                                                             |           |
| 4  | Other analyses           | 17 | Report other analyses done—eg analyses of subgroups and interactions, and sensitivity analyses                                                                                                               | 7         |
| 5  | <b>Discussion</b>        |    |                                                                                                                                                                                                              |           |
| 6  | Key results              | 18 | Summarise key results with reference to study objectives                                                                                                                                                     | 8         |
| 7  | Limitations              | 19 | Discuss limitations of the study, taking into account sources of potential bias or imprecision. Discuss both direction and magnitude of any potential bias                                                   | 10        |
| 8  | Interpretation           | 20 | Give a cautious overall interpretation of results considering objectives, limitations, multiplicity of analyses, results from similar studies, and other relevant evidence                                   | 8,9,10    |
| 9  | Generalisability         | 21 | Discuss the generalisability (external validity) of the study results                                                                                                                                        | 8,9,10    |
| 10 | <b>Other information</b> |    |                                                                                                                                                                                                              |           |
| 11 | Funding                  | 22 | Give the source of funding and the role of the funders for the present study and, if applicable, for the original study on which the present article is based                                                | 11        |

\*Give information separately for exposed and unexposed groups.

**Note:** An Explanation and Elaboration article discusses each checklist item and gives methodological background and published examples of transparent reporting. The STROBE checklist is best used in conjunction with this article (freely available on the Web sites of PLoS Medicine at <http://www.plosmedicine.org/>, Annals of Internal Medicine at <http://www.annals.org/>, and Epidemiology at <http://www.epidem.com/>). Information on the STROBE Initiative is available at <http://www.strobe-statement.org>.

# BMJ Open

## Sedation strategy and ICU Delirium: A multi-center, population-based propensity score-matched cohort study

|                                 |                                                                                                                                                                                                                                                                                                                                                                                                                                                                                                                                                                                                                                                                                    |
|---------------------------------|------------------------------------------------------------------------------------------------------------------------------------------------------------------------------------------------------------------------------------------------------------------------------------------------------------------------------------------------------------------------------------------------------------------------------------------------------------------------------------------------------------------------------------------------------------------------------------------------------------------------------------------------------------------------------------|
| Journal:                        | <i>BMJ Open</i>                                                                                                                                                                                                                                                                                                                                                                                                                                                                                                                                                                                                                                                                    |
| Manuscript ID                   | bmjopen-2020-045087.R1                                                                                                                                                                                                                                                                                                                                                                                                                                                                                                                                                                                                                                                             |
| Article Type:                   | Original research                                                                                                                                                                                                                                                                                                                                                                                                                                                                                                                                                                                                                                                                  |
| Date Submitted by the Author:   | 12-Apr-2021                                                                                                                                                                                                                                                                                                                                                                                                                                                                                                                                                                                                                                                                        |
| Complete List of Authors:       | Casault, Colin; University of Calgary Cumming School of Medicine, Department of Critical Care Medicine<br>Soo, Andrea; University of Calgary Cumming School of Medicine, Critical Care Medicine<br>Lee, Chel; University of Calgary Cumming School of Medicine, Department of Critical Care<br>Couillard, Philippe; University of Calgary Cumming School of Medicine, Critical Care Medicine<br>Niven, Daniel; University of Calgary Cumming School of Medicine, Critical Care Medicine<br>Stelfox, Tom; University of Calgary Cumming School of Medicine, Department of Critical Care<br>Fiest, Kirsten; University of Calgary Cumming School of Medicine, Critical Care Medicine |
| <b>Primary Subject Heading</b>: | Intensive care                                                                                                                                                                                                                                                                                                                                                                                                                                                                                                                                                                                                                                                                     |
| Secondary Subject Heading:      | Anaesthesia, Intensive care, Patient-centred medicine                                                                                                                                                                                                                                                                                                                                                                                                                                                                                                                                                                                                                              |
| Keywords:                       | Adult intensive & critical care < ANAESTHETICS, Health & safety < HEALTH SERVICES ADMINISTRATION & MANAGEMENT, Quality in health care < HEALTH SERVICES ADMINISTRATION & MANAGEMENT, Adult intensive & critical care < INTENSIVE & CRITICAL CARE, Delirium & cognitive disorders < PSYCHIATRY                                                                                                                                                                                                                                                                                                                                                                                      |
|                                 |                                                                                                                                                                                                                                                                                                                                                                                                                                                                                                                                                                                                                                                                                    |

SCHOLARONE™  
Manuscripts



I, the Submitting Author has the right to grant and does grant on behalf of all authors of the Work (as defined in the below author licence), an exclusive licence and/or a non-exclusive licence for contributions from authors who are: i) UK Crown employees; ii) where BMJ has agreed a CC-BY licence shall apply, and/or iii) in accordance with the terms applicable for US Federal Government officers or employees acting as part of their official duties; on a worldwide, perpetual, irrevocable, royalty-free basis to BMJ Publishing Group Ltd ("BMJ") its licensees and where the relevant Journal is co-owned by BMJ to the co-owners of the Journal, to publish the Work in this journal and any other BMJ products and to exploit all rights, as set out in our [licence](#).

The Submitting Author accepts and understands that any supply made under these terms is made by BMJ to the Submitting Author unless you are acting as an employee on behalf of your employer or a postgraduate student of an affiliated institution which is paying any applicable article publishing charge ("APC") for Open Access articles. Where the Submitting Author wishes to make the Work available on an Open Access basis (and intends to pay the relevant APC), the terms of reuse of such Open Access shall be governed by a Creative Commons licence – details of these licences and which [Creative Commons](#) licence will apply to this Work are set out in our licence referred to above.

Other than as permitted in any relevant BMJ Author's Self Archiving Policies, I confirm this Work has not been accepted for publication elsewhere, is not being considered for publication elsewhere and does not duplicate material already published. I confirm all authors consent to publication of this Work and authorise the granting of this licence.

1  
2  
3  
4  
5  
6  
7  
8  
9  
10  
11 Sedation strategy and ICU Delirium: A multi-center, population-based propensity score-matched cohort study  
12

13 Colin Casault<sup>a</sup>, MD; Andrea Soo<sup>a</sup>, PhD; Chel Hee Lee, PhD; Philippe Couillard<sup>a</sup>, MD; Daniel J Niven<sup>a,b</sup>, MD/PhD;  
14 Tom Stelfox<sup>a,b</sup>, MD/PhD; Kirsten M. Fiest<sup>a,b,c</sup>, PhD.  
15

16  
17  
18 a: Department of Critical Care Medicine, University of Calgary and Alberta Health Services, Calgary Alberta,  
19 Canada.

20 b: Department of Community Health Sciences and O'Brien Institute for Public Health, University of Calgary,  
21 Calgary, Alberta, Canada

22 c: Department of Psychiatry and Hotchkiss Brain Institute, University of Calgary, Calgary, Alberta, Canada  
23

24  
25 Address for Correspondence:

26 Colin Casault

27 Department of Critical Care, University of Calgary

28 Calgary, Alberta, Canada

29 T2N-1N4

30 (587) 432-6762

31 casaultc@gmail.com  
32

33 Abstract: 299 words

34 Manuscript: 3378 words

35 Tables: 4

36 Figures: 3  
37

38  
39 Conflicts of Interest: No author has a conflict of interest to declare.  
40

41 Keywords: Delirium, ICU sedation, fentanyl sedation, midazolam sedation  
42  
43  
44  
45  
46  
47  
48  
49  
50  
51  
52  
53  
54  
55  
56  
57  
58  
59  
60

1  
2  
3  
4  
5 **Objectives:** We examined the relationship between dominant sedation strategy, risk of delirium and patient-centred  
6 outcomes in adults admitted to intensive care units(ICUs).  
7

8 **Design:** Retrospective propensity matched cohort study.  
9

10 **Setting:** Mechanically-ventilated adults ( $\geq 18$  years) admitted to four Canadian hospital medical/surgical ICUs from  
11 2014 – 2016 in Calgary, Alberta, Canada.  
12

13 **Participants:** 2837 mechanically-ventilated adults ( $\geq 18$  years) requiring admission to a medical/surgical ICU were  
14 evaluated for the relationship between sedation strategy and delirium.  
15

16 **Interventions:** None.  
17

18 **Primary and secondary outcome measures:** The primary exposure was dominant sedation strategy, defined as the  
19 sedative infusion, including midazolam, propofol or fentanyl, with the longest duration prior to first delirium  
20 assessment. The primary outcome was 'ever delirium' identified using the Intensive Care Delirium Screening  
21 Checklist (ICDSC). Secondary outcomes included mortality, length of stay (LOS), duration of ventilation and  
22 number of days with delirium. We analyzed the cohort with two propensity score (patient characteristics and  
23 therapies received) matched cohorts (propofol vs. fentanyl and propofol vs. midazolam).  
24

25 **Results:** 2,837 patients (60.7% male; median age 57 years (interquartile range 43-68)) were considered for  
26 propensity matching. In propensity score-matched cohorts(propofol vs. midazolam, n=712; propofol vs. fentanyl,  
27 n=1,732), the odds of delirium were significantly higher with midazolam (odds ratio (OR) 1.46 (95% confidence  
28 interval(CI) 1.06-2.00)) and fentanyl (OR 1.22 (95% CI 1.00-1.48)) compared to propofol dominant sedation  
29 strategies. Dominant sedation strategy with midazolam and fentanyl were associated with longer duration of  
30 ventilation compared to propofol. Fentanyl was also associated with increased ICU mortality(OR 1.50 (1.07-2.12))  
31 ICU and hospital LOS compared to a propofol dominant sedation strategy.  
32

33 **Conclusions:** We identified a novel association between fentanyl dominant sedation strategies and an increased risk  
34 of delirium, a composite outcome of delirium or death, duration of mechanical ventilation, ICU LOS and hospital  
35 LOS. Midazolam dominant sedation strategies increased delirium risk and duration of mechanical ventilation.  
36

#### 37 **Article Summary:**

- 38 • We examine the effects of midazolam and fentanyl sedation strategies on delirium and patient centered
- 39 outcomes using a large cohort of general intensive care patients.
- 40 • To reduce bias, we used a propensity score matching process on a large database.
- 41 • One key limitation is secondary to the concurrent use of multiple overlapping sedation strategies which
- 42 may impact the results
- 43 • Based on the limitations and the nature of cohort studies, one should consider this study as hypothesis
- 44 generating.  
45  
46  
47  
48  
49  
50  
51  
52  
53  
54  
55  
56  
57  
58  
59  
60

### *Introduction:*

Delirium in critically ill patients is an acute confusional state marked by severe disorganization of cognition, fluctuating course, attentional deficit and a disturbance of awareness<sup>1</sup>. Older age, severity of illness, presence of mechanical ventilation, coma, and sedative medications place over 50% of ICU patients at risk for developing delirium<sup>2-6</sup>. Delirium in the ICU is common, and may prolong hospital stay, increase mortality risk and contribute to long term cognitive impairment<sup>7 8</sup>. With a burgeoning elderly population, ICU admission requiring mechanical ventilation is estimated to increase by 80% by 2026, therefore understanding potential contributors to delirium is paramount<sup>9 10</sup>.

Over-sedation in the ICU, with benzodiazepines in particular, may be harmful<sup>11,12</sup>. Prospective cohort and randomized controlled trials support shorter durations of mechanical ventilation, more rapid awakening with propofol or dexmedetomidine compared to midazolam<sup>13-17</sup>. Similarly, a population-based study by Lonardo *et al.* demonstrated higher mortality, longer duration of mechanical ventilation and longer ICU length of stay (LOS) in patients managed with benzodiazepines compared to propofol<sup>11</sup>. Lonardo *et al.* postulated midazolam's mortality effect may be due to increased rates of delirium. Delirium is associated with mortality, and some evidence supports patients treated with benzodiazepines may demonstrate higher rates of delirium in the ICU<sup>8 13 18 19</sup>. However, the association between benzodiazepines and delirium is inconsistent<sup>6</sup>.

Sedation strategies often employ both a sedative, like propofol, and an analgesic, like fentanyl, simultaneously to achieve a desired effect. However, studies evaluating the clinical effects of these sedation strategies are lacking. Additional research is necessary to understand the effects of sedation strategies on delirium, hospital length of stay (LOS) and survival outcomes. Our study examined the relationship between dominant sedation strategy (continuously infused propofol, fentanyl, and/or midazolam), delirium and important patient-centred outcomes, in a multi-center population-based sample of mechanically-ventilated adults admitted to ICU.

### *Methods:*

#### *Ethics Approval Statement:*

This retrospective cohort study was reported in compliance with the Strengthening the Reporting of Observational Studies in Epidemiology (STROBE) statement<sup>20</sup> and approved by the conjoint health research ethics board at the University of Calgary (REB17-0389).

#### *Patient & Public Involvement Statement:*

Neither patients, nor the public were not involved in the design, collection, compilation or completion of this research study.

*Study Setting & Population:*

We identified consecutive mechanical ventilated adults ( $\geq 18$  years) admitted to four medical-surgical ICUs in Calgary, Alberta, Canada between January 1, 2014, to June 30<sup>th</sup>, 2016. Patients were excluded if:

- 1) Their ICU electronic health data did not link to an appropriate inpatient (hospital) admission
- 2) They did not have any ICU admissions with at least 1 Intensive Care Delirium Screening Checklist (ICDSC) assessment (details described in the *Outcome Measures* section)
- 3) They were non-Alberta residents (to allow for mortality outcome follow-up post hospital discharge)
- 4) They did not receive at least 1 continuous infusion of midazolam, propofol or fentanyl prior to the first ICDSC assessment.
- 5) They were never invasively ventilated during their ICU stay.
- 6) They did not have a single dominant continuous infusion prior to the first ICDSC assessment (see definition of dominant sedation strategy in the *Exposure Measure* section below for further detail).

If the patient was readmitted to ICU more than once during the study period, then only the first admission with at least 1 ICDSC assessment was used. The ICUs are staffed by accredited intensive care physicians which provide mechanical ventilation, vasoactive medications, and invasive monitoring.

*Data sources:*

Study data was derived from three electronic databases<sup>21-23</sup>. eCritical Alberta, a database and electronic medical record, that prospectively captures detailed clinical and demographic information<sup>22</sup>. The discharge abstract database (DAD) captures data on all hospitalized patients, including admission date, discharge, survival status, and up to 25 diagnostic codes from the International Classification of Diseases, 10<sup>th</sup> revision, Canadian enhancement. Out of hospital deaths were obtained from Alberta Vital Statistics, which captures all deaths occurring in Alberta. Data from Alberta Vital Statistics was available up to December 30, 2017, which provided at least 18 months of follow-up from the ICU admission date.

*Exposures and Definitions:*

The main study exposure was dominant sedation strategy prior to the first ICDSC assessment. A sedation strategy was defined as a continuous analgo-sedative infusion limited to midazolam, fentanyl, and propofol.



1  
2  
3 Infusions were selected based on a screening survey which demonstrated small populations utilizing alternative  
4 sedation strategies. There were seven possible combinations for the sedation strategy prior to the first ICDSC  
5 assessment: 1) propofol only, 2) fentanyl only, 3) midazolam only, 4) propofol and fentanyl, 5) propofol and  
6 midazolam, 6) fentanyl and midazolam, and 7) all three agents. A high number of patients received more than 1  
7 agent, therefore we classified patients into a dominant sedation strategy, defined as the longest continuous duration  
8 of infusion prior to the first ICDSC assessment, which consists of three categories for the primary analyses. For  
9 example, if fentanyl was provided for the longest duration, fentanyl was considered the dominant sedation strategy.  
10 It is possible the patient could have received propofol or midazolam (or neither) for a duration less than fentanyl. If  
11 the patient received two agents for the same duration, the patient was excluded as no strategy was dominant. As  
12 sensitivity analyses, all seven possible combinations of the sedation strategy used prior to the first ICDSC  
13 assessment were considered.

#### 24 *Outcome Measures:*

25  
26 The primary outcome was categorized as ‘ever/never delirium’ during ICU admission compatible with  
27 previously established delirium outcome measures<sup>7</sup>. All ICU patients with a Richmond Agitation Sedation  
28 Scale(RASS)<sup>24</sup> score  $\geq -3$  were evaluated twice daily using the ICDSC tool<sup>25</sup> and received a protocolized sedation  
29 awakening trial. The ICDSC is a validated delirium assessment tool<sup>25</sup>. Ever delirium patients were those with an  
30 *ICDSC score*  $\geq 4$ ; never delirium were those with an *ICDSC score*  $< 4$ . Total number of days with an *ICDSC score*  $\geq 4$   
31 defined delirium duration. Duration of delirium (days) was examined in secondary analyses.

32  
33 Delirium motor subtypes were identified using the RASS, based on previously published criteria<sup>18</sup>, and  
34 associated positive ICDSC score of  $\geq 4$ . The scale is scored from -5 points (unarousable) to 0 points (calm) to +4  
35 points (combative), where scores between -3 to 0 indicate hypoactive delirium, scores between 1 to 3 indicate  
36 hyperactive delirium, and scores that fluctuate between hypoactive and hyperactive indicate mixed delirium. All  
37 ICDSC scores  $\geq 4$  were linked to the closest RASS score within 4 hours of charting. If there was no RASS score  
38 documented within 4 hours of the ICDSC score, the sub-type was considered “unable to be classified”. If there was a  
39 RASS score within 4 hours of the ICDSC score but the RASS was -5, -4 or +4, the sub-type was considered “unable  
40 to be assessed”. If at least 1 assessment indicated hypoactive delirium and at least 1 assessment indicated  
41 hyperactive delirium the sub-type was considered mixed for that specific patient.

1  
2  
3           Secondary outcomes were mortality in the ICU and hospital, duration of mechanical ventilation, and ICU &  
4 hospital lengths of stay (LOS). Patient mortality was also reported at 30-days and 1-year. Duration of invasive  
5 mechanical ventilation was defined as the time a patient required the use of invasive ventilator.  
6  
7

8  
9 *Statistical Analysis:*

10           Baseline characteristics were summarized using median with interquartile range (IQR) and frequency with  
11 percent and compared between sedation strategies using chi-squared tests and Kruskal-Wallis rank sum tests, as  
12 appropriate. For the primary outcome analysis, logistic regression was used to assess the association between  
13 dominant sedation strategy (propofol vs midazolam vs fentanyl) and risk of developing delirium. The relationship  
14 between dominant sedation strategy and delirium duration was analyzed using negative binomial models. The  
15 relationship between dominant sedation strategy and mortality outcomes were analyzed using logistic regression  
16 models. The relationship between dominant sedation strategy and LOS outcomes (ICU and hospital) were analyzed  
17 using linear regression models with a log-transformation of ICU LOS and hospital LOS. Primary analyses for all  
18 outcomes were based on forming two propensity score-matched cohorts: 1) propofol vs fentanyl and 2) propofol vs  
19 midazolam. Propensity scores were based on age, sex, reason for admission to ICU, Charlson comorbidity category  
20 (0, 1, 2+), admission APACHE II score, use of vasoactive medications and use of continuous renal replacement  
21 therapy. The cohorts were formed based on 1:1 nearest-neighbor matching without replacement using the logit of the  
22 propensity score and specified caliper width equal to 0.2 of the standard deviation of the logit of the propensity  
23 score<sup>26</sup>. Sensitivity analyses were based on the full cohort with models adjusted a priori for the same patient  
24 characteristics used in the propensity scores. The above analyses were repeated for the 7-category sedation strategy  
25 prior to the first ICDSC assessment. For these analyses, we formed six pairwise propensity score-matched cohorts  
26 similar to the primary analyses, matching with patients on propofol only for each of the other 6 categories of  
27 sedation strategy prior to the first ICDSC assessment. A two-sided p-value < 0.05 was considered statistically  
28 significant. Analyses were conducted in R, version 3.5.1.<sup>27</sup> Propensity-score matching was performed using the R  
29 package “MatchIt”, version 3.0.2. Additionally, to control for the competing effects of delirium and death, a  
30 sensitivity analysis of a composite endpoint of delirium or death was calculated.  
31  
32  
33  
34  
35  
36  
37  
38  
39  
40  
41  
42  
43  
44  
45  
46  
47  
48  
49

50  
51 *Results:*

52 There were 2,837 patients in the study cohort (Figure 1), which included 1412 patients (49.8%) receiving a propofol  
53 dominant strategy, 356 patients (12.5%) receiving a midazolam dominant strategy and 1069 patients (37.7%)  
54 receiving a fentanyl dominant strategy. For those receiving propofol dominant sedation, it was common to receive a  
55  
56  
57  
58  
59  
60

1  
2  
3 single agent of only propofol (62.8%). While among those receiving fentanyl and midazolam dominant sedation  
4 strategies, single agent use was less common with 14.8% and 34.8% only receiving a single agent, respectively.”  
5  
6 Most patients were male (60.7%) with a median age of 57 (IQR 43-68) years and admitted for a medical reason  
7 (50.4%). The median Charlson comorbidity score was 1 (IQR 0-2), admission SOFA score 7 (IQR 4-9) and  
8 admission APACHE II score 19 (IQR 14-25). Patients who received a midazolam dominant sedation strategy were  
9 more likely admitted for medical reasons (72.8%) and had higher Charlson comorbidity scores, admission SOFA  
10 scores and admission APACHE II scores than those receiving propofol and fentanyl dominant sedation strategies.  
11 Patients receiving midazolam dominant strategies were also more likely to receive vasoactive medications (68.8%)  
12 compared to those predominantly receiving propofol (45.3%) and fentanyl dominant sedation strategies (64.5%).  
13 (Table 1).  
14  
15  
16  
17  
18  
19  
20  
21

22 Due to missing patient characteristics for 5 patients (0.2%), propensity scores were calculated for 1,409  
23 patients receiving propofol dominant strategies, 1,067 patients receiving fentanyl dominant sedation strategies and  
24 356 patients receiving midazolam dominant sedation strategies. Of the patients receiving fentanyl dominant sedation  
25 strategies, 201 (18.8%) could not be matched to a patient receiving propofol dominant sedation strategies within the  
26 specified caliper width of 0.2; therefore, this resulted in a matched cohort for propofol and fentanyl of 1,732  
27 patients. Of the patients receiving midazolam dominant sedation strategies, all 356 patients could be matched to a  
28 patient receiving propofol dominant sedation strategies; therefore, this resulted in a matched cohort for patients with  
29 propofol and midazolam dominant sedation strategies of 712 patients. After matching, the baseline characteristics  
30 were balanced (Table 1). The median time from admission to first ICDSC in hours were similar between the  
31 propofol (median time = 17.1 hrs (IQR = 8.5-34.7)), midazolam ((median time = 17.6 hrs (IQR = 8.8-41.2)) and  
32 fentanyl (median time = 16.5 hrs (8.8-35.4)) dominant strategies. Additionally, the median number of ICDSC  
33 assessments per ICU day was similar for propofol (1.4 (IQR = 1.0-1.8)), fentanyl (1.4 (IQR 1.0-1.8)), midazolam (1.3  
34 (IQR 1.0-1.7)) dominant sedation strategies.  
35  
36  
37  
38  
39  
40  
41  
42  
43  
44  
45  
46

47 In the propensity score-matched cohorts, there was a statistically significant association between delirium  
48 and midazolam dominant (odds ratio [OR] 1.46 (95% confidence interval 1.06-2.00);  $p=0.02$ ) as well as fentanyl  
49 dominant (OR 1.22 (95% CI 1.00-1.48);  $p=0.05$ ) sedation strategies compared to propofol dominant sedation  
50 strategies (Figure 2). To control for the effects of death on delirium rates, a sensitivity analysis of the matched cohort  
51 was performed using a composite outcome of delirium or death. A statistically significant association between the  
52  
53  
54  
55  
56  
57  
58  
59  
60

1  
2  
3 composite outcome of delirium and death with midazolam dominant(OR 1.53 (95% CI 1.10-2.12; p=0.011) and  
4  
5 fentanyl dominant(OR 1.27 (95% CI 1.04-1.55; p=0.020) strategies was observed, however not for propofol  
6  
7 dominant strategies. Sensitivity analyses based on the 7-category sedation strategy prior to the first ICDS  
8  
9 assessment showed an increased odds of delirium for those on more than one agent compared to those on propofol  
10  
11 only (Table 2). Among those who ever experienced delirium, the distribution of delirium subtypes was similar  
12  
13 between dominant sedation strategies (Table 3). Based on the propensity score-matched cohorts, a fentanyl  
14  
15 dominant sedation strategy was associated with longer duration of mechanical ventilation, longer ICU and hospital  
16  
17 LOS and more delirium days compared to a propofol dominant sedation strategy, while a midazolam dominant  
18  
19 sedation strategy was associated with a longer duration of mechanical ventilation compared to a propofol dominant  
20  
21 sedation strategy(Figure 3). Sensitivity analyses of the secondary outcomes and cohort characteristics based on the  
22  
23 7-category sedation strategy can be found in the supplementary results(Supplementary Digital Content - Table 1 &  
24  
25 Table 2, respectively). There was a statistically significant association between fentanyl dominant sedation strategy  
26  
27 and ICU(OR=1.50 (1.07-2.12)) and 30-day mortality(OR=1.35 (1.02-1.79)) in propensity score-matched  
28  
29 analyses(Supplementary Digital Content - Table 3). An additional sensitivity analysis of the same propensity score-  
30  
31 matched cohort evaluating sedation strategy dominance for greater than 6 hours can be found in Table 4. This  
32  
33 analysis demonstrated a statistically significant association between fentanyl dominant strategies and a composite of  
34  
35 delirium or death, ICU mortality, hospital mortality, 30 day mortality, 1 year mortality, hospital length of stay and  
36  
37 duration of mechanical ventilation.

### 38 *Discussion:*

39  
40 Sedative strategies may increase the risk of adverse patient complications such as delirium, or prolonged  
41  
42 mechanical ventilation. We found a midazolam dominant sedation strategy was associated with increased risk of  
43  
44 developing delirium, duration of mechanical ventilation, and a composite of delirium and death. Alternatively,  
45  
46 fentanyl was associated with multiple detrimental outcomes including an increased risk of delirium, a composite  
47  
48 outcome of delirium or death, ICU & hospital LOS and duration of mechanical ventilation.

49  
50 The association between benzodiazepine-based sedation strategies and delirium has been suggested in prior  
51  
52 literature<sup>8 17 18</sup>. The importance of these findings should not be understated as patients with delirium suffer  
53  
54 prolonged hospital stays, an increased risk of mortality and long term cognitive impairment<sup>7 8</sup>. Sedation using  
55  
56 multiple agents was also associated with increased delirium risk, duration of mechanical ventilation, ICU LOS and  
57  
58

1  
2  
3 hospital LOS. Whether these effects are a direct result from the sedation strategy, the resulting delirium or as a result  
4 of other aspects of their critical illness is unclear.  
5

6  
7 We also re-confirmed the association between midazolam dominant sedation strategies and longer  
8 mechanical ventilation but not mortality as reported by Lonardo *et al.*<sup>11</sup>. The mechanism between the association of  
9 benzodiazepines and mortality is unclear, however prolonged mechanical ventilation is a known risk factor for  
10 mortality<sup>28</sup>. A meta-analysis by Ho *et al.* comparing propofol to other sedation strategies did not demonstrate an  
11 impact on mortality; however, it did not specifically look at midazolam compared to other benzodiazepines<sup>29</sup>. The  
12 heterogeneity in mortality outcomes may be attributable to variation in sedation depth, as early deep sedation is an  
13 independent predictor of delayed time to extubation and long term mortality<sup>12</sup>. Therefore, not only agent choice but  
14 also sedation depth might contribute to the variation in mortality risk observed with benzodiazepines.  
15  
16  
17  
18  
19  
20  
21

22 Sedation with midazolam and fentanyl is often selected for patients with significant hemodynamic  
23 instability to avoid the negative inotropic and vasodilatory effects of propofol. In our study, those receiving  
24 midazolam dominant sedation strategies demonstrated significantly higher SOFA scores, APACHE II scores on  
25 admission and were more likely to receive vasoactive medications and continuous renal replacement. All of these  
26 may impact mortality when unaccounted for and may explain the heterogeneity observed in the literature<sup>30</sup>. For  
27 example, Lonardo *et al.* did not control for the presence of renal replacement which has been associated with a high  
28 rate of mortality in critically ill patients<sup>11 31</sup>. Our use of detailed clinical data for risk adjustment may help explain  
29 the differences in mortality compared to prior reports.  
30  
31  
32  
33  
34  
35  
36

37 A fentanyl dominant sedation strategy was significantly associated with an increased risk of delirium, a  
38 composite of delirium or death, ICU LOS, hospital LOS and duration of mechanical ventilation. Prior literature  
39 shows associations with delayed extubation when given in the first 48 hours, which supports our findings<sup>12</sup>. What is  
40 unclear is whether our result is a direct effect of fentanyl, an indirect effect from resulting complications of fentanyl  
41 use, for example a pulmonary embolism or pneumonia, or simply an observed association driven by an unidentified  
42 confounder. Fentanyl dominant strategies were associated with increased risk of ICU mortality, 30-day mortality,  
43 and at hospital discharge but not 1 year. It is difficult to know what to make of these observations. The relationship  
44 between fentanyl use and ICU mortality has been incompletely explored in the literature. The mortality risk  
45 associated with fentanyl use may be attributable to prolongations in mechanical ventilation<sup>28</sup>. In our data, the effect  
46 of mortality appeared strongest in those receiving only fentanyl and was less robust when used in combination.  
47  
48  
49  
50  
51  
52  
53  
54  
55  
56  
57  
58  
59  
60

1  
2  
3 However, when fentanyl was the dominant strategy for greater than 6 hours compared to the other two strategies, the  
4 association between fentanyl and negative patient centred outcomes was more consistent. This may suggest the  
5 detrimental association between fentanyl dominant strategies and patient centred outcomes observed is time  
6 dependent. Another possibility could be the immunomodulatory effects of narcotics. The mu-opioid receptor is  
7 expressed on macrophages and T-lymphocytes, and chronic administration may increase the risk of bacterial  
8 infection<sup>32-34</sup>. Therefore, large doses of fentanyl may contribute to further immune dysregulation thereby placing  
9 critically ill patients at risk of infection. A final possibility is the use of fentanyl in the provision of palliative  
10 symptom control, therefore the mortality association is a marker of this practice. Further study is required to better  
11 delineate the true nature of the association between fentanyl and deleterious patient outcomes in the ICU.  
12  
13  
14  
15  
16  
17  
18  
19

20 Our studies strength is our large cohort size supported by granular patient detail extracted from a  
21 prospectively collected, clinical database representing multiple ICUs and the covariates were rigorously controlled  
22 using a propensity matched model<sup>22</sup>. The multicenter study design provides a pragmatic view of how sedation  
23 strategies are utilized in clinical practice. Limitations of our study include the possibility of confounding bias due to  
24 unmeasured impactful covariates or confounding by indication. Patients receiving midazolam dominant strategies  
25 were clearly more critically ill compared to those receiving propofol dominant strategies manifest by higher  
26 APACHE II scores, greater vasopressor requirements, and higher rates of renal replacement. To compensate, we  
27 conducted propensity score-matched analyses adjusted for known covariates. Additionally, fentanyl and midazolam  
28 are often used concurrently. Clearly teasing apart the isolated effects of each medication may be challenging.  
29 Adjustment with our statistical model should minimize this effect, however, it is possible that unrecognized  
30 confounders which are not accounted for in the model could introduce unrecognized bias. Randomized controlled  
31 trials would better assess this limitation. Moreover, we focused primarily on the presence or absence of continuous  
32 infusions and did not quantify the impact of independent drug boluses. However, this effect would lessen the  
33 association with our primary outcome suggesting our observed associations are conservative. Another limitation is  
34 the use of drug duration as a surrogate for the impact of the sedation strategy rather than in vivo plasma  
35 concentrations. Patient factors may impact midazolam metabolism due to differences in age, hepatic or renal  
36 dysfunction or co-administration of medications with similar metabolic pathways<sup>35-37</sup>. Finally, the definition of  
37 dominant sedation strategy based on longest duration of infusion prior to first ICDSC may be considered arbitrary. It  
38 is also possible that the current definition classifies some patients as having one dominant sedation strategy when  
39  
40  
41  
42  
43  
44  
45  
46  
47  
48  
49  
50  
51  
52  
53  
54  
55  
56  
57  
58  
59  
60

1  
2  
3 multiple infusions were discontinued in a noticeably short time frame. However, defining sedation in the setting of  
4 multiple agents has been incompletely explored in the literature, therefore novel definitions are required. Our data  
5 closely reflects multiple findings previously reported with both midazolam and fentanyl sedation. Furthermore,  
6  
7 when restricted to patients who received a dominant sedation strategy for greater than 6 hours, the association  
8  
9 between fentanyl dominant strategies and negative patient outcomes was more apparent. This reduces the possibility  
10  
11 our findings are pure chance.  
12  
13

#### 14 *Conclusion:*

15  
16 This multi-center, propensity score-matched cohort study demonstrates a novel association between fentanyl  
17 dominant sedation strategies and negative outcomes in the ICU. Fentanyl dominant sedation strategies were  
18 associated with an increased risk of delirium, a composite of delirium or death, duration of ventilation, ICU LOS  
19 and hospital LOS. We also confirmed previous reports including an increased risk of delirium and duration of  
20 mechanical ventilation with midazolam dominant sedation strategies. This study highlights the need for additional  
21 research to further evaluate potentially negative effects of fentanyl and midazolam based sedation strategies.  
22  
23  
24  
25  
26  
27  
28  
29

#### 30 Sources of Funding:

31 This project was unfunded.  
32  
33  
34

#### 35 Disclosures:

36 The authors have no conflicts of interest.  
37  
38  
39  
40

#### 41 Acknowledgements:

42  
43 The authors would like to thank the Hotchkiss Brain institute, the O'Brien Institute for Public Health, and the  
44 University of Calgary Departments of Critical Care, Community Health Sciences and Psychiatry for their on-going  
45 support. Moreover, we would like to thank the reviewers and editorial team for their hard work and consideration.  
46  
47  
48  
49  
50

51 Contributorship Statement: Dr CC was involved in the concept, study protocol, study oversight, statistical modeling,  
52 and all aspects of writing the manuscript. Drs AS & CHL were involved in the statistical modeling and contributed  
53  
54  
55  
56  
57  
58  
59  
60

1  
2  
3 to the methods section of the manuscript. Drs KF, DN, TS, PC were involved in developing the concept, study  
4 protocol, study oversight and contributed to the discussion of the manuscript.  
5  
6  
7

8  
9 Data Sharing Statement: Raw data were generated at the University of Calgary. Derived data supporting the findings  
10 of this study are available from the corresponding author CC on request.  
11  
12  
13

14  
15 References:

- 16  
17 1. Association AP. Diagnostic and Statistical Manual of Mental Disorders(DSM-5). Arlington, VA:  
18 American Psychiatric Association 2013.
- 19  
20 2. Ely EW, Inouye SK, Bernard GR, et al. Delirium in mechanically ventilated patients: validity  
21 and reliability of the confusion assessment method for the intensive care unit (CAM-  
22 ICU). *JAMA* 2001;286(21):2703-10.
- 23  
24 3. Dubois MJ, Bergeron N, Dumont M, et al. Delirium in an intensive care unit: a study of risk  
25 factors. *Intensive Care Med* 2001;27(8):1297-304.
- 26  
27 4. Pandharipande P, Cotton BA, Shintani A, et al. Prevalence and risk factors for development of  
28 delirium in surgical and trauma intensive care unit patients. *J Trauma* 2008;65(1):34-41.  
29 doi: 10.1097/TA.0b013e31814b2c4d
- 30  
31 5. Girard TD, Kress JP, Fuchs BD, et al. Efficacy and safety of a paired sedation and ventilator  
32 weaning protocol for mechanically ventilated patients in intensive care (Awakening and  
33 Breathing Controlled trial): a randomised controlled trial. *Lancet* 2008;371(9607):126-  
34 34. doi: 10.1016/S0140-6736(08)60105-1
- 35  
36 6. Zaal IJ, Devlin JW, Peelen LM, et al. A systematic review of risk factors for delirium in the ICU.  
37 *Crit Care Med* 2015;43(1):40-7. doi: 10.1097/CCM.0000000000000625
- 38  
39 7. Thomason JW, Shintani A, Peterson JF, et al. Intensive care unit delirium is an independent  
40 predictor of longer hospital stay: a prospective analysis of 261 non-ventilated patients.  
41 *Crit Care* 2005;9(4):R375-81. doi: 10.1186/cc3729
- 42  
43 8. Ely E, Shintani A, Truman B, et al. Delirium as a predictor of mortality in mechanically  
44 ventilated patients in the intensive care unit. . *JAMA* 2004;291(14):1753-62.
- 45  
46 9. Needham DM, Bronskill SE, Calinawan JR, et al. Projected incidence of mechanical ventilation  
47 in Ontario to 2026: Preparing for the aging baby boomers. *Crit Care Med*  
48 2005;33(3):574-9.
- 49  
50 10. Jacobs P, Noseworthy TW. National estimates of intensive care utilization and costs: Canada  
51 and the United States. *Crit Care Med* 1990;18(11):1282-6.
- 52  
53 11. Lonardo NW, Mone MC, Nirula R, et al. Propofol is associated with favorable outcomes  
54 compared with benzodiazepines in ventilated intensive care unit patients. *Am J Respir*  
55 *Crit Care Med* 2014;189(11):1383-94. doi: 10.1164/rccm.201312-2291OC
- 56  
57 12. Shehabi Y, Bellomo R, Reade MC, et al. Early intensive care sedation predicts long-term  
58 mortality in ventilated critically ill patients. *Am J Respir Crit Care Med* 2012;186(8):724-  
59 31. doi: 10.1164/rccm.201203-0522OC  
60



13. Riker RR, Shehabi Y, Bokesch PM, et al. Dexmedetomidine vs midazolam for sedation of critically ill patients: a randomized trial. *JAMA* 2009;301(5):489-99. doi: 10.1001/jama.2009.56
14. R B-v, Mar Sanchez-Soria M, Morales-Garcia C, et al. Prolonged sedation of critically ill patients with midazolam or propofol: impact on weaning and costs. *Crit Care Med* 1997;25(1):33-40.
15. Aitkenhead AR, Pepperman ML, Willatts SM, et al. Comparison of propofol and midazolam for sedation in critically ill patients. *Lancet* 1989;2(8665):704-9.
16. Chamorro C, de Latorre FJ, Montero A, et al. Comparative study of propofol versus midazolam in the sedation of critically ill patients: results of a prospective, randomized, multicenter trial. *Crit Care Med* 1996;24(6):932-9.
17. Barr J, Fraser GL, Puntillo K, et al. Clinical practice guidelines for the management of pain, agitation, and delirium in adult patients in the intensive care unit. *Crit Care Med* 2013;41(1):263-306. doi: 10.1097/CCM.0b013e3182783b72
18. Pandhairpande P, Shintani A, Peterson J, et al. Lorazepam is an independent risk factor for transitioning to delirium in intensive care unit patients. *Anesthesiology* 2006;104(1):21-26.
19. Cammarano WB, Pittet JF, Weitz S, et al. Acute withdrawal syndrome related to the administration of analgesic and sedative medications in adult intensive care unit patients. *Crit Care Med* 1998;26(4):676-84.
20. von Elm E, Altman DG, Egger M, et al. The Strengthening the Reporting of Observational Studies in Epidemiology (STROBE) statement: guidelines for reporting observational studies. *The Lancet* 2007;370(9596):1453-57. doi: 10.1016/s0140-6736(07)61602-x
21. Chiasson TC, Manns BJ, Stelfox HT. An economic evaluation of venous thromboembolism prophylaxis strategies in critically ill trauma patients at risk of bleeding. *PLoS Med* 2009;6(6):e1000098. doi: 10.1371/journal.pmed.1000098
22. Brundin-Mather R, Soo A, Zuege DJ, et al. Secondary EMR data for quality improvement and research: A comparison of manual and electronic data collection from an integrated critical care electronic medical record system. *J Crit Care* 2018;47:295-301. doi: 10.1016/j.jcrc.2018.07.021
23. Stelfox HT, Soo A, Niven DJ, et al. Assessment of the Safety of Discharging Select Patients Directly Home From the Intensive Care Unit: A Multicenter Population-Based Cohort Study. *JAMA Intern Med* 2018;178(10):1390-99. doi: 10.1001/jamainternmed.2018.3675
24. Sessler CN, Gosnell MS, Grap MJ, et al. The Richmond Agitation-Sedation Scale: validity and reliability in adult intensive care unit patients. *Am J Respir Crit Care Med* 2002;166(10):1338-44. doi: 10.1164/rccm.2107138
25. Bergeron N, Dubois MJ, Dumont M, et al. Intensive Care Delirium Screening Checklist: evaluation of a new screening tool. *Intensive Care Med* 2001;27(5):859-64.
26. Austin PC. Optimal caliper widths for propensity-score matching when estimating differences in means and differences in proportions in observational studies. *Pharm Stat* 2011;10(2):150-61. doi: 10.1002/pst.433
27. Team RC. R: A language and environment for statistical computing. . 2018

28. Feng Y, Amoateng-Adjepong Y, Kaufman D, et al. Age, duration of mechanical ventilation, and outcomes of patients who are critically ill. *Chest* 2009;136(3):759-64. doi: 10.1378/chest.09-0515
29. Ho KM, Ng JY. The use of propofol for medium and long-term sedation in critically ill adult patients: a meta-analysis. *Intensive Care Med* 2008;34(11):1969-79. doi: 10.1007/s00134-008-1186-5
30. Soo A, Zuege DJ, Fick GH, et al. Describing organ dysfunction in the intensive care unit: a cohort study of 20,000 patients. *Crit Care* 2019;23(1):186. doi: 10.1186/s13054-019-2459-9
31. Uchino S, Kellum JA, Bellomo R, et al. Acute renal failure in critically ill patients: a multinational, multicenter study. *JAMA* 2005;294(7):813-8. doi: 10.1001/jama.294.7.813
32. Risdahl JM, Khanna KV, Peterson PK, et al. Opiates and infection. *J Neuroimmunol* 1998;83(1-2):4-18.
33. Roy S, Loh HH. Effects of opioids on the immune system. *Neurochem Res* 1996;21(11):1375-86.
34. Roy S, Wang J, Kelschenbach J, et al. Modulation of immune function by morphine: implications for susceptibility to infection. *J Neuroimmune Pharmacol* 2006;1(1):77-89. doi: 10.1007/s11481-005-9009-8
35. Barr J, Zomorodi K, Bertaccini EJ, et al. A double-blind, randomized comparison of i.v. lorazepam versus midazolam for sedation of ICU patients via a pharmacologic model. *Anesthesiology* 2001;95(2):286-98.
36. Swart EL, Zuideveld KP, de Jongh J, et al. Comparative population pharmacokinetics of lorazepam and midazolam during long-term continuous infusion in critically ill patients. *Br J Clin Pharmacol* 2004;57(2):135-45.
37. Oldenhof H, de Jong M, Steenhoek A, et al. Clinical pharmacokinetics of midazolam in intensive care patients, a wide interpatient variability? *Clin Pharmacol Ther* 1988;43(3):263-9.

Tables:

**Table 1: Baseline Characteristics**

|                         | Overall cohort    |                   |                   | Dominant sedation strategy matched cohorts |                   |                                      |                  |
|-------------------------|-------------------|-------------------|-------------------|--------------------------------------------|-------------------|--------------------------------------|------------------|
|                         | Propofol (n=1412) | Fentanyl (n=1069) | Midazolam (n=356) | Propofol vs. Midazolam matched cohort      |                   | Propofol vs. Fentanyl matched cohort |                  |
| Characteristic          |                   |                   |                   | Propofol (n=356)                           | Midazolam (n=356) | Propofol (n=866)                     | Fentanyl (n=866) |
| Age, median (IQR)       | 56 (42-67)        | 59 (44-69)        | 59 (46-71)        | 58 (48-69)                                 | 59 (46-71)        | 57 (46-68)                           | 57 (42-69)       |
| Male, n (%)             | 843 (59.7)        | 656 (61.4)        | 223 (62.6)        | 227 (63.8)                                 | 223 (62.6)        | 533 (61.5)                           | 520 (60.0)       |
| Admission reason, n (%) |                   |                   |                   |                                            |                   |                                      |                  |
| Medical                 | 791 (56.0)        | 379 (35.5)        | 259 (72.8)        | 253 (71.1)                                 | 259 (72.8)        | 426 (49.2)                           | 379 (43.8)       |
| Surgical                | 265 (18.8)        | 405 (37.9)        | 69 (19.4)         | 74 (20.8)                                  | 69 (19.4)         | 256 (29.6)                           | 248 (28.6)       |

|                                             |                |                |                |               |            |               |               |
|---------------------------------------------|----------------|----------------|----------------|---------------|------------|---------------|---------------|
| Neurological                                | 245<br>(17.4)  | 73 (6.8)       | 19 (5.3)       | 18 (5.1)      | 19 (5.3)   | 76 (8.8)      | 73 (8.4)      |
| Trauma                                      | 109 (7.7)      | 211 (19.7)     | 9 (2.5)        | 11 (3.1)      | 9 (2.5)    | 108<br>(12.5) | 166<br>(19.2) |
| Location admitted from                      |                |                |                |               |            |               |               |
| Emergency Room                              | 833<br>(59.0%) | 413<br>(38.6%) | 190<br>(53.4%) | 202<br>(56.7) | 190 (53.4) | 441<br>(50.9) | 369<br>(42.6) |
| Operating Room/Recovery                     | 278<br>(19.7%) | 399<br>(37.3%) | 59 (16.6%)     | 63 (17.7)     | 59 (16.6)  | 232<br>(26.8) | 271<br>(31.3) |
| Hospital Ward                               | 254<br>(18.0%) | 209<br>(19.6%) | 91 (25.6%)     | 85 (23.9)     | 91 (25.6)  | 165<br>(19.1) | 180<br>(20.8) |
| Another Hospital                            | 26<br>(1.8%)   | 24 (2.2%)      | 7 (2.0%)       | 4 (1.1)       | 7 (2.0)    | 17 (2.0)      | 23 (2.7)      |
| Other                                       | 21<br>(1.5%)   | 24 (2.2%)      | 9 (2.5%)       | 2 (0.6)       | 9 (2.5)    | 11 (1.3)      | 23 (2.7)      |
| Charlson score, n (%)                       |                |                |                |               |            |               |               |
| 0                                           | 582<br>(41.2%) | 422<br>(39.5%) | 121<br>(34.0%) | 127<br>(35.7) | 121 (34.0) | 322<br>(37.2) | 336<br>(38.8) |
| 1                                           | 317<br>(22.5%) | 239<br>(22.4%) | 70 (19.7%)     | 61 (17.1)     | 70 (19.7)  | 201<br>(23.2) | 207<br>(23.9) |
| 2+                                          | 513<br>(36.3%) | 408<br>(38.2%) | 165<br>(46.3%) | 168<br>(47.2) | 165 (46.3) | 343<br>(39.6) | 323<br>(37.3) |
| Charlson score, median (IQR)                | 1 (0-2)        | 1 (0-2)        | 1 (0-3)        | 1 (0-3)       | 1 (0-3)    | 1 (0-3)       | 1 (0-2)       |
| Admission SOFA score, median (IQR)          | 6 (4-8)        | 7 (5-10)       | 8 (6-11)       | 8 (5-10)      | 8 (6-11)   | 7 (4-9)       | 7 (4-10)      |
| Admission APACHE II score, median (IQR)     | 18 (13-24)     | 19 (14-25)     | 23 (16-28)     | 21 (16-27)    | 23 (16-28) | 19 (14-24)    | 19 (13-26)    |
| Vasoactive medications, n (%)               | 639<br>(45.3%) | 690<br>(64.5%) | 245<br>(68.8%) | 241<br>(67.7) | 245 (68.8) | 526<br>(60.7) | 488<br>(56.4) |
| Continuous renal replacement therapy, n (%) | 59<br>(4.2%)   | 78 (7.3%)      | 33 (9.3%)      | 28 (7.9)      | 33 (9.3)   | 52 (6.0)      | 73 (8.4)      |

**Table 2: Sensitivity Analyses examining the relationship between delirium and individual sedation agents prior to first ICDS assessment**

| Sedation agent prior to first ICDS assessment | Overall Cohort     |                      |                                   | Matched cohorts              |                                                                 |                      |                                                                    |
|-----------------------------------------------|--------------------|----------------------|-----------------------------------|------------------------------|-----------------------------------------------------------------|----------------------|--------------------------------------------------------------------|
|                                               | Number of patients | Ever Delirium, n (%) | Adjusted OR (95% CI) <sup>1</sup> | Number of patients per group | Ever Delirium for propofol patients from matched cohorts, n (%) | Ever Delirium, n (%) | Propensity score-matched OR for Ever delirium(95% CI) <sup>2</sup> |
| Propofol                                      | 887                | 509 (57.4)           | 1.00 (reference group)            | N/A <sup>3</sup>             | N/A <sup>3</sup>                                                | N/A <sup>3</sup>     | 1.00 (reference group)                                             |
| Fentanyl                                      | 158                | 91 (57.6)            | 1.04 (0.71-1.52)                  | 152                          | 74 (48.7)                                                       | 87 (57.2)            | 1.41 (0.90-2.22)                                                   |
| Midazolam                                     | 124                | 77 (62.1)            | 1.11 (0.73-1.69)                  | 122                          | 69 (56.6)                                                       | 75 (61.5)            | 1.23 (0.74-2.05)                                                   |
| Propofol + Fentanyl                           | 854                | 543 (63.6)           | 1.32 (1.06-1.65)                  | 565                          | 323 (57.2)                                                      | 347 (61.4)           | 1.19 (0.94-1.51)                                                   |

|                      |     |            |                  |     |            |            |                  |
|----------------------|-----|------------|------------------|-----|------------|------------|------------------|
| Propofol + Midazolam | 224 | 163 (72.8) | 1.72 (1.23-2.43) | 223 | 143 (64.1) | 162 (72.6) | 1.49 (1.00-2.23) |
| Fentanyl + Midazolam | 222 | 160 (72.1) | 1.72 (1.22-2.46) | 214 | 119 (55.6) | 153 (71.5) | 2.00 (1.34-3.00) |
| All 3                | 368 | 269 (73.1) | 1.84 (1.38-2.47) | 335 | 199 (59.4) | 241 (71.9) | 1.75 (1.27-2.42) |

**Table 3: Delirium subtype by dominant sedation strategy prior to first ICDSC assessment among patients experiencing delirium for the propensity score-matched cohorts**

|                                     | Dominant sedation strategy                                          |                  |                                                                      |                   |
|-------------------------------------|---------------------------------------------------------------------|------------------|----------------------------------------------------------------------|-------------------|
|                                     | Propofol vs. Fentanyl matched cohort patients experiencing delirium |                  | Propofol vs. Midazolam matched cohort patients experiencing delirium |                   |
| Delirium Subtype                    | Propofol (n=529)                                                    | Fentanyl (n=569) | Propofol (n=228)                                                     | Midazolam (n=257) |
| Hyperactive only, n (%)             | 47 (8.9)                                                            | 40 (7.0)         | 15 (6.6)                                                             | 25 (9.7)          |
| Hypoactive only, n (%)              | 210 (39.7)                                                          | 228 (40.1)       | 104 (45.6)                                                           | 106 (41.2)        |
| Mixed, n (%)                        | 254 (48.0)                                                          | 289 (50.8)       | 103 (45.2)                                                           | 123 (47.9)        |
| Unable to assess or classify, n (%) | 18 (3.4)                                                            | 12 (2.1)         | 6 (2.6)                                                              | 3 (1.2)           |

Table 4: Sensitivity analyses based on those on a single sedation strategy or those whose sedation strategy was dominant for  $\geq 6$  hours over the other 2 strategies.

| Outcome                                      | Dominant Sedation Strategy | Propensity score-matched odds ratio, mean ratio or rate ratio (95% CI) <sup>1</sup> |
|----------------------------------------------|----------------------------|-------------------------------------------------------------------------------------|
| Delirium ever                                | Propofol                   | 1.00 (reference group)                                                              |
|                                              | Fentanyl                   | 1.29 (0.99-1.69)                                                                    |
|                                              | Midazolam                  | <b>1.64 (1.12-2.41)</b>                                                             |
| Delirium or ICU death                        | Propofol                   | 1.00 (reference group)                                                              |
|                                              | Fentanyl                   | <b>1.38 (1.05-1.81)</b>                                                             |
|                                              | Midazolam                  | <b>1.75 (1.18-2.60)</b>                                                             |
| ICU Mortality                                | Propofol                   | 1.00 (reference group)                                                              |
|                                              | Fentanyl                   | <b>1.82 (1.18-2.84)</b>                                                             |
|                                              | Midazolam                  | 1.31 (0.73-2.39)                                                                    |
| Hospital Mortality                           | Propofol                   | 1.00 (reference group)                                                              |
|                                              | Fentanyl                   | <b>1.69 (1.19-2.42)</b>                                                             |
|                                              | Midazolam                  | 1.50 (0.92-2.49)                                                                    |
| Died within 30 days of ICU admission         | Propofol                   | 1.00 (reference group)                                                              |
|                                              | Fentanyl                   | <b>1.84 (1.27-2.68)</b>                                                             |
|                                              | Midazolam                  | 1.14 (0.69-1.89)                                                                    |
| Died within 1 year of ICU admission          | Propofol                   | 1.00 (reference group)                                                              |
|                                              | Fentanyl                   | <b>1.38 (1.02-1.86)</b>                                                             |
|                                              | Midazolam                  | 1.16 (0.77-1.76)                                                                    |
| Died within 1.5 years of ICU admission       | Propofol                   | 1.00 (reference group)                                                              |
|                                              | Fentanyl                   | 1.25 (0.94-1.66)                                                                    |
|                                              | Midazolam                  | 1.25 (0.84-1.85)                                                                    |
| ICU length of stay, mean ratio (95% CI)      | Propofol                   | 1.00 (reference group)                                                              |
|                                              | Fentanyl                   | <b>1.23 (1.09-1.39)</b>                                                             |
|                                              | Midazolam                  | 1.01 (0.86-1.20)                                                                    |
| Hospital length of stay, mean ratio (95% CI) | Propofol                   | 1.00 (reference group)                                                              |
|                                              | Fentanyl                   | <b>1.31 (1.13-1.51)</b>                                                             |
|                                              | Midazolam                  | 1.01 (0.83-1.22)                                                                    |
| Duration of invasive ventilation, mean       | Propofol                   | 1.00 (reference group)                                                              |

|                                              |           |                         |
|----------------------------------------------|-----------|-------------------------|
| ratio (95% CI)                               | Fentanyl  | <b>1.35 (1.14-1.59)</b> |
|                                              | Midazolam | 1.17 (0.94-1.46)        |
| Number of delirium days, rate ratio (95% CI) | Propofol  | 1.00 (reference group)  |
|                                              | Fentanyl  | 1.19 (0.99-1.43)        |
|                                              | Midazolam | 1.11 (0.85-1.44)        |

<sup>1</sup>Data presented as odds ratios unless otherwise indicated

Figure Legends:

**Figure 1: Cohort diagram**

**Figure 2: Propensity score-matched odds ratios of delirium by dominant sedation strategy prior to first ICDSC assessment**

**Figure 3: Forest plot of propensity score-matched mean or rate ratios of secondary outcomes and sedation strategy**

**Figure 1: Cohort diagram**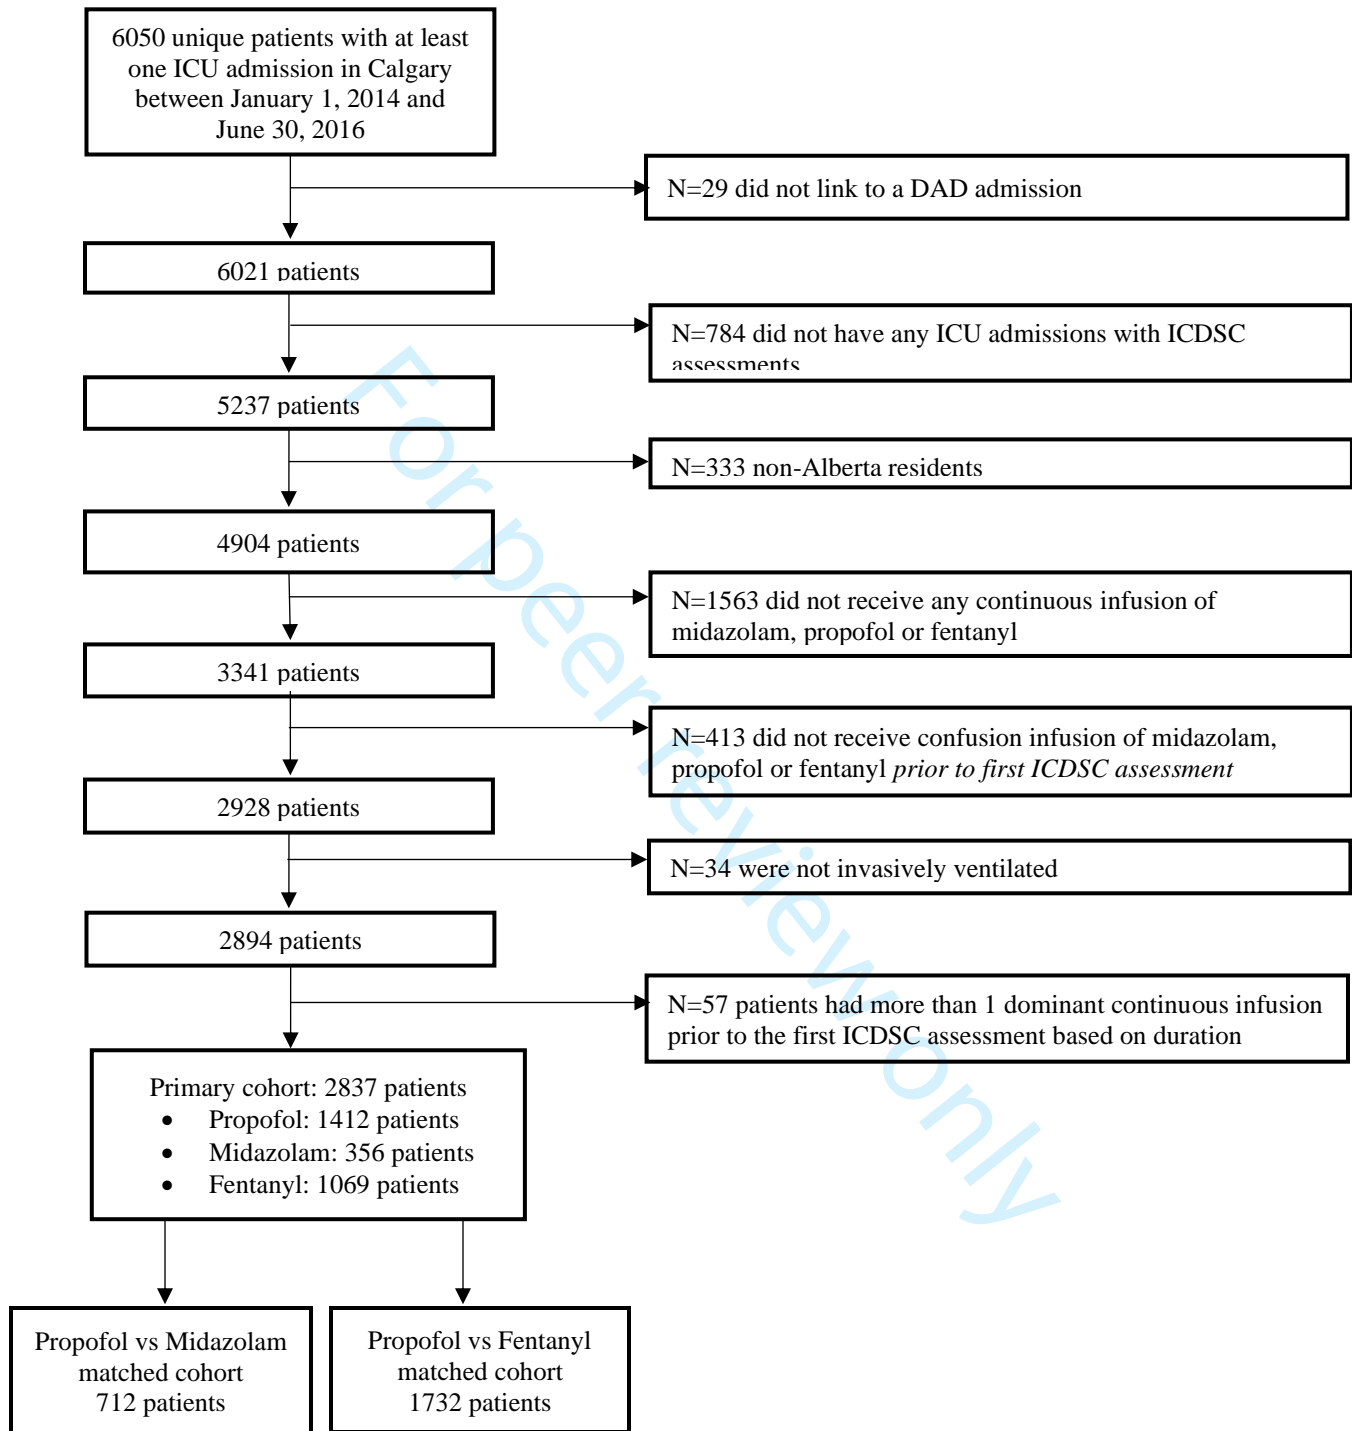

**Figure 2: Propensity score-matched odds ratios of delirium by dominant sedation strategy prior to first ICDSC assessment**



Peer review only

**Figure 3: Forest plot of propensity score-matched mean or rate ratios of secondary outcomes and sedation strategy**

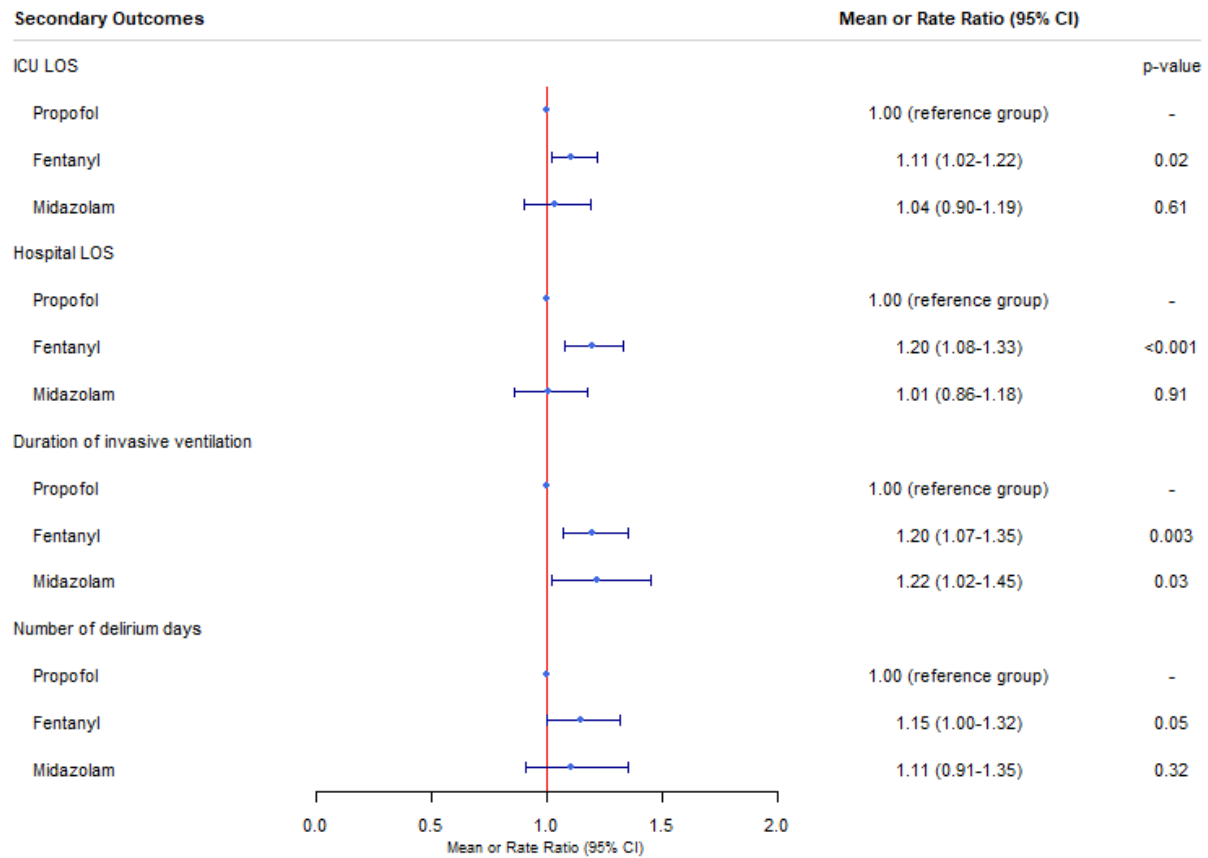



**Table S1: Secondary outcomes by sedation strategy prior to first ICDC assessment**

| Propensity score-matched mean ratio or rate ratio (95% CI) <sup>1</sup> | ICU LOS                 | Hospital LOS            | Duration of invasive ventilation | Number of delirium days |
|-------------------------------------------------------------------------|-------------------------|-------------------------|----------------------------------|-------------------------|
| Sedation prior to first ICDC assessment                                 |                         |                         |                                  |                         |
| Propofol                                                                | 1.00 (reference group)  | 1.00 (reference group)  | 1.00 (reference group)           | 1.00 (reference group)  |
| Fentanyl                                                                | 1.06 (0.85-1.33)        | 1.25 (0.97-1.61)        | 1.00 (0.74-1.35)                 | 1.03 (0.69-1.55)        |
| Midazolam                                                               | 0.83 (0.65-1.06)        | 0.98 (0.75-1.28)        | 1.00 (0.73-1.38)                 | 0.88 (0.59-1.31)        |
| Propofol + Fentanyl                                                     | <b>1.17 (1.05-1.30)</b> | <b>1.20 (1.05-1.38)</b> | <b>1.37 (1.18-1.58)</b>          | 1.08 (0.90-1.31)        |
| Propofol + Midazolam                                                    | 1.16 (0.99-1.36)        | 0.86 (0.68-1.08)        | <b>1.59 (1.28-1.99)</b>          | 1.11 (0.87-1.41)        |
| Fentanyl + Midazolam                                                    | <b>1.40 (1.17-1.67)</b> | <b>1.27 (1.02-1.57)</b> | <b>1.95 (1.54-2.46)</b>          | 1.28 (0.97-1.69)        |
| All 3                                                                   | <b>1.73 (1.52-1.98)</b> | <b>1.39 (1.18-1.63)</b> | <b>2.47 (2.06-2.97)</b>          | <b>1.35 (1.10-1.67)</b> |

<sup>1</sup>Propensity score based on age, sex, admission class, Charlson comorbidity category (0, 1, 2+), admission APACHE II score, vasoactive medications, continuous renal replacement therapy. 1:1 nearest-neighbor matching without replacement using the logit of the propensity score and specified caliper width equal to 0.2 of the standard deviation of the logit of the propensity score

**Table S2: Propensity score matched models of the relationship between mortality outcomes and dominant sedation strategy prior to first ICDSC assessment**

| Outcome                              | Dominant Sedation Strategy | Mortality, n (%) | Propensity score-matched OR (95% CI) <sup>2</sup> |
|--------------------------------------|----------------------------|------------------|---------------------------------------------------|
| ICU Mortality                        | Propofol                   | 94 (6.7)         | 1.00 (reference)                                  |
|                                      | Fentanyl                   | 104 (9.7)        | <b>1.50 (1.07-2.12)</b>                           |
|                                      | Midazolam                  | 39 (11.0)        | 1.20 (0.74-1.97)                                  |
| Hospital Mortality                   | Propofol                   | 157 (11.1)       | 1.00 (reference)                                  |
|                                      | Fentanyl                   | 166 (15.5)       | 1.27 (0.97-1.67)                                  |
|                                      | Midazolam                  | 59 (16.6)        | 1.14 (0.76-1.70)                                  |
| Died within 30 days of ICU admission | Propofol                   | 148 (10.5)       | 1.00 (reference)                                  |
|                                      | Fentanyl                   | 148 (13.8)       | <b>1.35 (1.02-1.79)</b>                           |
|                                      | Midazolam                  | 50 (14.0)        | 1.02 (0.67-1.57)                                  |
| Died within 1 year of ICU admission  | Propofol                   | 268 (19.0)       | 1.00 (reference)                                  |
|                                      | Fentanyl                   | 248 (23.2)       | 1.13 (0.90-1.43)                                  |
|                                      | Midazolam                  | 91 (25.6)        | 1.01 (0.72-1.42)                                  |

Supplementary Table 3: Table of baseline characteristics for sensitivity analyses

|                         | Propofol<br>(n=887) | Fentanyl<br>(n=158) | Midazolam<br>(n=124) | Propofol<br>+<br>Fentanyl<br>(n=854) | Propofol +<br>Midazolam<br>(n=224) | Fentanyl +<br>Midazolam<br>(n=222) | All 3<br>(n=368) |
|-------------------------|---------------------|---------------------|----------------------|--------------------------------------|------------------------------------|------------------------------------|------------------|
| <b>Characteristic</b>   |                     |                     |                      |                                      |                                    |                                    |                  |
| Age, median (IQR)       | 58 (46-69)          | 64 (54-74)          | 66 (54-74)           | 55 (40-67)                           | 51 (35-60)                         | 61 (51-71)                         | 52 (40-65)       |
| Male, n (%)             | 506 (57.0)          | 79 (50.0)           | 79 (63.7)            | 532 (62.3)                           | 145 (64.7)                         | 133 (59.9)                         | 248 (67.4)       |
| Admission reason, n (%) |                     |                     |                      |                                      |                                    |                                    |                  |
| Medical                 | 518 (58.5)          | 59 (37.3)           | 87 (70.2)            | 236 (27.7)                           | 176 (78.6)                         | 121 (54.5)                         | 232 (63.0)       |
| Surgical                | 163 (18.4)          | 72 (45.6)           | 30 (24.2)            | 299 (35.1)                           | 7 (3.1)                            | 81 (36.5)                          | 87 (23.6)        |
| Neurological            | 169 (19.1)          | 10 (6.3)            | 6 (4.8)              | 102 (12.0)                           | 37 (16.5)                          | 3 (1.4)                            | 10 (2.7)         |
| Trauma                  | 35 (4.0)            | 17 (10.8)           | 1 (0.8)              | 216 (25.3)                           | 4 (1.8)                            | 17 (7.7)                           | 39 (10.6)        |
| Location admitted from  |                     |                     |                      |                                      |                                    |                                    |                  |
| Emergency Room          | 520 (58.6)          | 53 (33.5)           | 49 (39.5)            | 367 (43.0)                           | 168 (75.0)                         | 93 (41.9)                          | 186 (50.5)       |
| Operating Room/Recovery | 170 (19.2)          | 62 (39.2)           | 27 (21.8)            | 320 (37.5)                           | 6 (2.7)                            | 65 (29.3)                          | 86 (23.4)        |
| Hospital Ward           | 166 (18.7)          | 39 (24.7)           | 43 (34.7)            | 140 (16.4)                           | 40 (17.9)                          | 49 (22.1)                          | 77 (20.9)        |
| Another Hospital        | 17 (1.9)            | 3 (1.9)             | 2 (1.6)              | 13 (1.5)                             | 7 (3.1)                            | 7 (3.2)                            | 8 (2.2)          |
| Other                   | 14 (1.6)            | 1 (0.6)             | 3 (2.4)              | 14 (1.6)                             | 3 (1.3)                            | 8 (3.6)                            | 11 (3.0)         |
| Charlson score, n (%)   |                     |                     |                      |                                      |                                    |                                    |                  |
| 0                       | 338 (38.1)          | 47 (29.7)           | 30 (24.2)            | 387 (45.3)                           | 106 (47.3)                         | 74 (33.3)                          | 143 (38.9)       |
| 1                       | 204 (23.0)          | 35 (22.2)           | 19 (15.3)            | 171 (20.0)                           | 55 (24.6)                          | 50 (22.5)                          | 92 (25.0)        |
| 2+                      | 345 (38.9)          | 76 (48.1)           | 75 (60.5)            | 296 (34.7)                           | 63 (28.1)                          | 98 (44.1)                          | 133 (36.1)       |

|                                             |            |            |            |            |            |            |            |
|---------------------------------------------|------------|------------|------------|------------|------------|------------|------------|
| Charlson score, median (IQR)                | 1 (0-3)    | 1 (0-3)    | 2 (1-4)    | 1 (0-2)    | 1 (0-2)    | 1 (0-3)    | 1 (0-2)    |
| Admission SOFA score, median (IQR)          | 6 (4-8)    | 8 (5-10)   | 8 (5-10)   | 6 (4-9)    | 7 (5-9)    | 9 (6-11)   | 8 (5-11)   |
| Admission APACHE II score, median (IQR)     | 18 (14-23) | 20 (15-26) | 23 (16-28) | 17 (12-22) | 20 (14-25) | 22 (16-29) | 21 (14-26) |
| Vasoactive medications, n (%)               | 356 (40.1) | 105 (66.5) | 81 (65.3)  | 477 (55.9) | 117 (52.2) | 175 (78.8) | 263 (71.5) |
| Continuous renal replacement therapy, n (%) | 35 (3.9)   | 10 (6.3)   | 9 (7.3)    | 41 (4.8)   | 7 (3.1)    | 32 (14.4)  | 36 (9.8)   |

STROBE Statement—Checklist of items that should be included in reports of *cohort studies*

|                           | Item No | Recommendation                                                                                                                                                                                                                                                                                                         | Page No               |
|---------------------------|---------|------------------------------------------------------------------------------------------------------------------------------------------------------------------------------------------------------------------------------------------------------------------------------------------------------------------------|-----------------------|
| <b>Title and abstract</b> | 1       | (a) Indicate the study's design with a commonly used term in the title or the abstract<br>(b) Provide in the abstract an informative and balanced summary of what was done and what was found                                                                                                                          | 1, 2                  |
| <b>Introduction</b>       |         |                                                                                                                                                                                                                                                                                                                        |                       |
| Background/rationale      | 2       | Explain the scientific background and rationale for the investigation being reported                                                                                                                                                                                                                                   | 3                     |
| Objectives                | 3       | State specific objectives, including any prespecified hypotheses                                                                                                                                                                                                                                                       | 3                     |
| <b>Methods</b>            |         |                                                                                                                                                                                                                                                                                                                        |                       |
| Study design              | 4       | Present key elements of study design early in the paper                                                                                                                                                                                                                                                                | 4                     |
| Setting                   | 5       | Describe the setting, locations, and relevant dates, including periods of recruitment, exposure, follow-up, and data collection                                                                                                                                                                                        | 4                     |
| Participants              | 6       | (a) Give the eligibility criteria, and the sources and methods of selection of participants. Describe methods of follow-up<br>(b) For matched studies, give matching criteria and number of exposed and unexposed                                                                                                      | 4                     |
| Variables                 | 7       | Clearly define all outcomes, exposures, predictors, potential confounders, and effect modifiers. Give diagnostic criteria, if applicable                                                                                                                                                                               | 5,6                   |
| Data sources/measurement  | 8*      | For each variable of interest, give sources of data and details of methods of assessment (measurement). Describe comparability of assessment methods if there is more than one group                                                                                                                                   | 4, 6                  |
| Bias                      | 9       | Describe any efforts to address potential sources of bias                                                                                                                                                                                                                                                              | 6                     |
| Study size                | 10      | Explain how the study size was arrived at                                                                                                                                                                                                                                                                              | 5                     |
| Quantitative variables    | 11      | Explain how quantitative variables were handled in the analyses. If applicable, describe which groupings were chosen and why                                                                                                                                                                                           | 4,6                   |
| Statistical methods       | 12      | (a) Describe all statistical methods, including those used to control for confounding<br>(b) Describe any methods used to examine subgroups and interactions<br>(c) Explain how missing data were addressed<br>(d) If applicable, explain how loss to follow-up was addressed<br>(e) Describe any sensitivity analyses | 6, Supplement methods |
| <b>Results</b>            |         |                                                                                                                                                                                                                                                                                                                        |                       |
| Participants              | 13*     | (a) Report numbers of individuals at each stage of study—eg numbers potentially eligible, examined for eligibility, confirmed eligible, included in the study, completing follow-up, and analysed<br>(b) Give reasons for non-participation at each stage<br>(c) Consider use of a flow diagram                        | 7, Figure 1           |
| Descriptive data          | 14*     | (a) Give characteristics of study participants (eg demographic, clinical, social) and information on exposures and potential confounders<br>(b) Indicate number of participants with missing data for each variable of interest<br>(c) Summarise follow-up time (eg, average and total amount)                         | 4, 7 Table 1          |
| Outcome data              | 15*     | Report numbers of outcome events or summary measures over time                                                                                                                                                                                                                                                         | 7 Table 2, 3,         |

1  
2  
3  
4  
5  
6  
7  
8  
9  
10  
11  
12  
13  
14  
15  
16  
17  
18  
19  
20  
21  
22  
23  
24  
25  
26  
27  
28  
29  
30  
31  
32  
33  
34  
35  
36  
37  
38  
39  
40  
41  
42  
43  
44  
45  
46  
47  
48  
49  
50  
51  
52  
53  
54  
55  
56  
57  
58  
59  
60

For peer review only

|    |                          |    |                                                                                                                                                                                                              |           |
|----|--------------------------|----|--------------------------------------------------------------------------------------------------------------------------------------------------------------------------------------------------------------|-----------|
| 1  | Main results             | 16 | (a) Give unadjusted estimates and, if applicable, confounder-adjusted estimates and their precision (eg, 95% confidence interval). Make clear which confounders were adjusted for and why they were included | Table 2,3 |
| 2  |                          |    | (b) Report category boundaries when continuous variables were categorized                                                                                                                                    |           |
| 3  |                          |    | (c) If relevant, consider translating estimates of relative risk into absolute risk for a meaningful time period                                                                                             |           |
| 4  | Other analyses           | 17 | Report other analyses done—eg analyses of subgroups and interactions, and sensitivity analyses                                                                                                               | 7         |
| 5  | <b>Discussion</b>        |    |                                                                                                                                                                                                              |           |
| 6  | Key results              | 18 | Summarise key results with reference to study objectives                                                                                                                                                     | 8         |
| 7  | Limitations              | 19 | Discuss limitations of the study, taking into account sources of potential bias or imprecision. Discuss both direction and magnitude of any potential bias                                                   | 10        |
| 8  | Interpretation           | 20 | Give a cautious overall interpretation of results considering objectives, limitations, multiplicity of analyses, results from similar studies, and other relevant evidence                                   | 8,9,10    |
| 9  | Generalisability         | 21 | Discuss the generalisability (external validity) of the study results                                                                                                                                        | 8,9,10    |
| 10 | <b>Other information</b> |    |                                                                                                                                                                                                              |           |
| 11 | Funding                  | 22 | Give the source of funding and the role of the funders for the present study and, if applicable, for the original study on which the present article is based                                                | 11        |

\*Give information separately for exposed and unexposed groups.

**Note:** An Explanation and Elaboration article discusses each checklist item and gives methodological background and published examples of transparent reporting. The STROBE checklist is best used in conjunction with this article (freely available on the Web sites of PLoS Medicine at <http://www.plosmedicine.org/>, Annals of Internal Medicine at <http://www.annals.org/>, and Epidemiology at <http://www.epidem.com/>). Information on the STROBE Initiative is available at <http://www.strobe-statement.org>.

# BMJ Open

## Sedation strategy and ICU Delirium: A multi-center, population-based propensity score-matched cohort study

|                                 |                                                                                                                                                                                                                                                                                                                                                                                                                                                                                                                                                                                                                                                                                    |
|---------------------------------|------------------------------------------------------------------------------------------------------------------------------------------------------------------------------------------------------------------------------------------------------------------------------------------------------------------------------------------------------------------------------------------------------------------------------------------------------------------------------------------------------------------------------------------------------------------------------------------------------------------------------------------------------------------------------------|
| Journal:                        | <i>BMJ Open</i>                                                                                                                                                                                                                                                                                                                                                                                                                                                                                                                                                                                                                                                                    |
| Manuscript ID                   | bmjopen-2020-045087.R2                                                                                                                                                                                                                                                                                                                                                                                                                                                                                                                                                                                                                                                             |
| Article Type:                   | Original research                                                                                                                                                                                                                                                                                                                                                                                                                                                                                                                                                                                                                                                                  |
| Date Submitted by the Author:   | 10-Jun-2021                                                                                                                                                                                                                                                                                                                                                                                                                                                                                                                                                                                                                                                                        |
| Complete List of Authors:       | Casault, Colin; University of Calgary Cumming School of Medicine, Department of Critical Care Medicine<br>Soo, Andrea; University of Calgary Cumming School of Medicine, Critical Care Medicine<br>Lee, Chel; University of Calgary Cumming School of Medicine, Department of Critical Care<br>Couillard, Philippe; University of Calgary Cumming School of Medicine, Critical Care Medicine<br>Niven, Daniel; University of Calgary Cumming School of Medicine, Critical Care Medicine<br>Stelfox, Tom; University of Calgary Cumming School of Medicine, Department of Critical Care<br>Fiest, Kirsten; University of Calgary Cumming School of Medicine, Critical Care Medicine |
| <b>Primary Subject Heading</b>: | Intensive care                                                                                                                                                                                                                                                                                                                                                                                                                                                                                                                                                                                                                                                                     |
| Secondary Subject Heading:      | Anaesthesia, Intensive care, Patient-centred medicine                                                                                                                                                                                                                                                                                                                                                                                                                                                                                                                                                                                                                              |
| Keywords:                       | Adult intensive & critical care < ANAESTHETICS, Health & safety < HEALTH SERVICES ADMINISTRATION & MANAGEMENT, Quality in health care < HEALTH SERVICES ADMINISTRATION & MANAGEMENT, Adult intensive & critical care < INTENSIVE & CRITICAL CARE, Delirium & cognitive disorders < PSYCHIATRY                                                                                                                                                                                                                                                                                                                                                                                      |
|                                 |                                                                                                                                                                                                                                                                                                                                                                                                                                                                                                                                                                                                                                                                                    |

SCHOLARONE™  
Manuscripts





I, the Submitting Author has the right to grant and does grant on behalf of all authors of the Work (as defined in the below author licence), an exclusive licence and/or a non-exclusive licence for contributions from authors who are: i) UK Crown employees; ii) where BMJ has agreed a CC-BY licence shall apply, and/or iii) in accordance with the terms applicable for US Federal Government officers or employees acting as part of their official duties; on a worldwide, perpetual, irrevocable, royalty-free basis to BMJ Publishing Group Ltd ("BMJ") its licensees and where the relevant Journal is co-owned by BMJ to the co-owners of the Journal, to publish the Work in this journal and any other BMJ products and to exploit all rights, as set out in our [licence](#).

The Submitting Author accepts and understands that any supply made under these terms is made by BMJ to the Submitting Author unless you are acting as an employee on behalf of your employer or a postgraduate student of an affiliated institution which is paying any applicable article publishing charge ("APC") for Open Access articles. Where the Submitting Author wishes to make the Work available on an Open Access basis (and intends to pay the relevant APC), the terms of reuse of such Open Access shall be governed by a Creative Commons licence – details of these licences and which [Creative Commons](#) licence will apply to this Work are set out in our licence referred to above.

Other than as permitted in any relevant BMJ Author's Self Archiving Policies, I confirm this Work has not been accepted for publication elsewhere, is not being considered for publication elsewhere and does not duplicate material already published. I confirm all authors consent to publication of this Work and authorise the granting of this licence.

1  
2  
3  
4  
5  
6  
7  
8  
9  
10  
11 Sedation strategy and ICU Delirium: A multi-center, population-based propensity score-matched cohort study  
12

13 Colin Casault<sup>a</sup>, MD; Andrea Soo<sup>a</sup>, PhD; Chel Hee Lee, PhD; Philippe Couillard<sup>a</sup>, MD; Daniel J Niven<sup>a,b</sup>, MD/PhD;  
14 Tom Stelfox<sup>a,b</sup>, MD/PhD; Kirsten M. Fiest<sup>a,b,c</sup>, PhD.  
15

16  
17  
18 a: Department of Critical Care Medicine, University of Calgary and Alberta Health Services, Calgary Alberta,  
19 Canada.

20 b: Department of Community Health Sciences and O'Brien Institute for Public Health, University of Calgary,  
21 Calgary, Alberta, Canada

22 c: Department of Psychiatry and Hotchkiss Brain Institute, University of Calgary, Calgary, Alberta, Canada  
23

24  
25 Address for Correspondence:

26 Colin Casault

27 Department of Critical Care, University of Calgary

28 Calgary, Alberta, Canada

29 T2N-1N4

30 (587) 432-6762

31 casaultc@gmail.com  
32

33 Abstract: 303 words

34 Manuscript: 3484 words

35 Tables: 4

36 Figures: 3  
37

38  
39 Conflicts of Interest: No author has a conflict of interest to declare.  
40

41 Keywords: Delirium, ICU sedation, fentanyl sedation, midazolam sedation  
42  
43  
44  
45  
46  
47  
48  
49  
50  
51  
52  
53  
54  
55  
56  
57  
58  
59  
60

1  
2  
3  
4  
5 **Objectives:** We examined the relationship between dominant sedation strategy, risk of delirium, and patient-centered outcomes in adults admitted to intensive care units(ICUs).

6  
7  
8 **Design:** Retrospective propensity-matched cohort study.

9  
10 **Setting:** Mechanically-ventilated adults ( $\geq 18$  years) admitted to four Canadian hospital medical/surgical ICUs from 2014 – 2016 in Calgary, Alberta, Canada.

11  
12  
13 **Participants:** 2837 mechanically-ventilated adults ( $\geq 18$  years) requiring admission to a medical/surgical ICU were evaluated for the relationship between sedation strategy and delirium.

14  
15 **Interventions:** None.

16  
17 **Primary and secondary outcome measures:** The primary exposure was dominant sedation strategy, defined as the sedative infusion, including midazolam, propofol or fentanyl, with the longest duration before the first delirium assessment. The primary outcome was 'ever delirium' identified using the Intensive Care Delirium Screening Checklist (ICDSC). Secondary outcomes included mortality, length of stay (LOS), duration of ventilation, and number of days with delirium. We analyzed the cohort with two propensity score (patient characteristics and therapies received) matched cohorts (propofol vs. fentanyl and propofol vs. midazolam).

18  
19  
20  
21  
22  
23  
24 **Results:** 2,837 patients (60.7% male; median age 57 years (interquartile range 43-68)) were considered for propensity matching. In propensity score-matched cohorts(propofol vs. midazolam, n=712; propofol vs. fentanyl, n=1,732), the odds of delirium were significantly higher with midazolam (odds ratio (OR) 1.46 (95% confidence interval(CI) 1.06-2.00)) and fentanyl (OR 1.22 (95% CI 1.00-1.48)) compared to propofol dominant sedation strategies. Dominant sedation strategy with midazolam and fentanyl were associated with a longer duration of ventilation compared to propofol. Fentanyl was also associated with increased ICU mortality(OR 1.50 (1.07-2.12)) ICU and hospital LOS compared to a propofol dominant sedation strategy.

25  
26  
27  
28  
29  
30  
31 **Conclusions:** We identified a novel association between fentanyl dominant sedation strategies and an increased risk of delirium, a composite outcome of delirium or death, duration of mechanical ventilation, ICU LOS, and hospital LOS. Midazolam dominant sedation strategies were also associated with increased delirium risk and duration of mechanical ventilation.

32  
33  
34  
35  
36  
37 **Article Summary:**

- 38  
39  
40  
41  
42  
43  
44  
45  
46  
47  
48  
49  
50  
51  
52  
53  
54  
55  
56  
57  
58  
59  
60
- We examine the effects of midazolam and fentanyl sedation strategies on delirium and patient-centered outcomes using a large cohort of general intensive care patients.
  - To reduce bias, we used a propensity score matching process on a extensive database.
  - One fundamental limitation is secondary to the concurrent use of multiple overlapping sedation strategies, which may impact the results.
  - Based on the limitations and the nature of cohort studies, this study as hypothesis-generating.

1  
2  
3 *Introduction:*  
4

5 Delirium in critically ill patients is an acute confusional state marked by severe disorganization of  
6 cognition, fluctuating course, attentional deficit, and a disturbance of awareness<sup>1</sup>. Older age, severity of illness,  
7 presence of mechanical ventilation, coma, and sedative medications place over 50% of ICU patients at risk for  
8 developing delirium<sup>2-6</sup>. Delirium in the ICU is common and may prolong hospital stay, increase mortality risk and  
9 contribute to long-term cognitive impairment<sup>7,8</sup>. With a burgeoning elderly population, ICU admission requiring  
10 mechanical ventilation is estimated to increase by 80% by 2026; therefore understanding potential contributors to  
11 delirium is paramount<sup>9,10</sup>.

12  
13  
14  
15  
16  
17  
18 Over-sedation in the ICU, with benzodiazepines, in particular, may be harmful<sup>11,12</sup>. Prospective cohort and  
19 randomized controlled trials support shorter durations of mechanical ventilation, more rapid awakening with  
20 propofol or dexmedetomidine than midazolam<sup>13-17</sup>. Similarly, a population-based study by Lonardo *et al.*  
21 demonstrated higher mortality, longer duration of mechanical ventilation, and longer ICU length of stay (LOS) in  
22 patients managed with benzodiazepines compared to propofol<sup>11</sup>. Lonardo *et al.* postulated midazolam's mortality  
23 effect might be due to increased rates of delirium. Delirium is associated with mortality, and some evidence supports  
24 patients treated with benzodiazepines may demonstrate higher rates of delirium in the ICU<sup>8,13,18,19</sup>. However, the  
25 association between benzodiazepines and delirium is inconsistent<sup>6</sup>.

26  
27  
28  
29  
30  
31  
32  
33 Sedation strategies often employ both a sedative, like propofol, and an analgesic, like fentanyl,  
34 simultaneously to achieve the desired effect. However, studies evaluating the clinical effects of these sedation  
35 strategies are lacking. Additional research is necessary to understand the effects of sedation strategies on delirium,  
36 hospital length of stay (LOS), and survival outcomes. Our study examined the relationship between dominant  
37 sedation strategy (continuously infused propofol, fentanyl, and/or midazolam), delirium, and important patient-  
38 centered outcomes, in a multi-center population-based sample of mechanically-ventilated adults admitted to ICU.

39  
40  
41  
42  
43  
44  
45 *Methods:*  
46

47 *Ethics Approval Statement:*  
48

49 This retrospective cohort study was reported in compliance with the Strengthening the Reporting of Observational  
50 Studies in Epidemiology (STROBE) statement<sup>20</sup> and approved by the conjoint health research ethics board at the  
51 University of Calgary (REB17-0389).  
52

53  
54  
55 *Patient & Public Involvement Statement:*  
56  
57  
58  
59  
60

Neither patients, nor the public were not involved in the design, collection, compilation or completion of this research study.

*Study Setting & Population:*

We identified consecutive mechanical ventilated adults ( $\geq 18$  years) admitted to four medical-surgical ICUs in Calgary, Alberta, Canada between January 1, 2014, to June 30<sup>th</sup>, 2016. Patients were excluded if:

- 1) Their ICU electronic health data did not link to an appropriate inpatient (hospital) admission
- 2) They did not have any ICU admissions with at least 1 Intensive Care Delirium Screening Checklist (ICDSC) assessment (details described in the *Outcome Measures* section)
- 3) They were non-Alberta residents (to allow for mortality outcome follow-up post hospital discharge)
- 4) They did not receive at least 1 continuous infusion of midazolam, propofol or fentanyl prior to the first ICDSC assessment.
- 5) They were never invasively ventilated during their ICU stay.
- 6) They did not have a single dominant continuous infusion prior to the first ICDSC assessment (see definition of dominant sedation strategy in the *Exposure Measure* section below for further detail).

If the patient was readmitted to ICU more than once during the study period, then only the first admission with at least 1 ICDSC assessment was used. The ICUs are staffed by accredited intensive care physicians which provide mechanical ventilation, vasoactive medications, and invasive monitoring.

*Data sources:*

Study data was derived from three electronic databases<sup>21-23</sup>. eCritical Alberta, a database and electronic medical record, that prospectively captures detailed clinical and demographic information<sup>22</sup>. The discharge abstract database (DAD) captures data on all hospitalized patients, including admission date, discharge, survival status, and up to 25 diagnostic codes from the International Classification of Diseases, 10<sup>th</sup> revision, Canadian enhancement. Out of hospital deaths were obtained from Alberta Vital Statistics, which captures all deaths occurring in Alberta. Data from Alberta Vital Statistics was available up to December 30, 2017, which provided at least 18 months of follow-up from the ICU admission date.

*Exposures and Definitions:*

The main study exposure was dominant sedation strategy prior to the first ICDSC assessment. A sedation strategy was defined as a continuous analgo-sedative infusion limited to midazolam, fentanyl, and propofol.

1  
2  
3 Infusions were selected based on a screening survey which demonstrated small populations utilizing alternative  
4 sedation strategies. There were seven possible combinations for the sedation strategy prior to the first ICDSC  
5 assessment: 1) propofol only, 2) fentanyl only, 3) midazolam only, 4) propofol and fentanyl, 5) propofol and  
6 midazolam, 6) fentanyl and midazolam, and 7) all three agents. A high number of patients received more than 1  
7 agent, therefore we classified patients into a dominant sedation strategy, defined as the longest continuous duration  
8 of infusion prior to the first ICDSC assessment, which consists of three categories for the primary analyses. For  
9 example, if fentanyl was provided for the longest duration, fentanyl was considered the dominant sedation strategy.  
10 It is possible the patient could have received propofol or midazolam (or neither) for a duration less than fentanyl. If  
11 the patient received two agents for the same duration, the patient was excluded as no strategy was dominant. As  
12 sensitivity analyses, all seven possible combinations of the sedation strategy used prior to the first ICDSC  
13 assessment were considered.

#### 24 *Outcome Measures:*

25  
26 The primary outcome was categorized as ‘ever/never delirium’ during ICU admission compatible with  
27 previously established delirium outcome measures<sup>7</sup>. All ICU patients with a Richmond Agitation Sedation  
28 Scale(RASS)<sup>24</sup> score  $\geq -3$  were evaluated twice daily using the ICDSC tool<sup>25</sup> and received a protocolized sedation  
29 awakening trial. The ICDSC is a validated delirium assessment tool<sup>25</sup>. Ever delirium patients were those with an  
30 *ICDSC score*  $\geq 4$ ; never delirium were those with an *ICDSC score*  $< 4$ . Total number of days with an *ICDSC score*  $\geq 4$   
31 defined delirium duration. Duration of delirium (days) was examined in secondary analyses.

32  
33 Delirium motor subtypes were identified using the RASS, based on previously published criteria<sup>18</sup>, and  
34 associated positive ICDSC score of  $\geq 4$ . The scale is scored from -5 points (unarousable) to 0 points (calm) to +4  
35 points (combative), where scores between -3 to 0 indicate hypoactive delirium, scores between 1 to 3 indicate  
36 hyperactive delirium, and scores that fluctuate between hypoactive and hyperactive indicate mixed delirium. All  
37 ICDSC scores  $\geq 4$  were linked to the closest RASS score within 4 hours of charting. If there was no RASS score  
38 documented within 4 hours of the ICDSC score, the sub-type was considered “unable to be classified”. If there was a  
39 RASS score within 4 hours of the ICDSC score but the RASS was -5, -4 or +4, the sub-type was considered “unable  
40 to be assessed”. If at least 1 assessment indicated hypoactive delirium and at least 1 assessment indicated  
41 hyperactive delirium the sub-type was considered mixed for that specific patient.

1  
2  
3 Secondary outcomes were mortality in the ICU and hospital, duration of mechanical ventilation, and ICU &  
4 hospital lengths of stay (LOS). Patient mortality was also reported at 30-days and 1-year. Duration of invasive  
5 mechanical ventilation was defined as the time a patient required the use of invasive ventilator.  
6  
7

8  
9 *Statistical Analysis:*

10 Baseline characteristics were summarized using median with interquartile range (IQR) and frequency with  
11 percent and compared between sedation strategies using chi-squared tests and Kruskal-Wallis rank sum tests, as  
12 appropriate. For the primary outcome analysis, logistic regression was used to assess the association between  
13 dominant sedation strategy (propofol vs midazolam vs fentanyl) and risk of developing delirium. The relationship  
14 between dominant sedation strategy and delirium duration was analyzed using negative binomial models. The  
15 relationship between dominant sedation strategy and mortality outcomes were analyzed using logistic regression  
16 models. The relationship between dominant sedation strategy and LOS outcomes (ICU and hospital) were analyzed  
17 using linear regression models with a log-transformation of ICU LOS and hospital LOS. Primary analyses for all  
18 outcomes were based on forming two propensity score-matched cohorts: 1) propofol vs fentanyl and 2) propofol vs  
19 midazolam. Propensity scores were based on age, sex, reason for admission to ICU, Charlson comorbidity category  
20 (0, 1, 2+), admission APACHE II score, use of vasoactive medications and use of continuous renal replacement  
21 therapy. The cohorts were formed based on 1:1 nearest-neighbor matching without replacement using the logit of the  
22 propensity score and specified caliper width equal to 0.2 of the standard deviation of the logit of the propensity  
23 score<sup>26</sup>. Sensitivity analyses were based on the full cohort with models adjusted a priori for the same patient  
24 characteristics used in the propensity scores. The above analyses were repeated for the 7-category sedation strategy  
25 prior to the first ICDSC assessment. For these analyses, we formed six pairwise propensity score-matched cohorts  
26 similar to the primary analyses, matching with patients on propofol only for each of the other 6 categories of  
27 sedation strategy prior to the first ICDSC assessment. A two-sided p-value < 0.05 was considered statistically  
28 significant. Analyses were conducted in R, version 3.5.1.<sup>27</sup> Propensity-score matching was performed using the R  
29 package “MatchIt”, version 3.0.2. Additionally, to control for the competing effects of delirium and death, a  
30 sensitivity analysis of a composite endpoint of delirium or death was calculated.  
31  
32  
33  
34  
35  
36  
37  
38  
39  
40  
41  
42  
43  
44  
45  
46  
47  
48  
49  
50

51 *Results:*

52 There were 2,837 patients in the study cohort (Figure 1), which included 1412 patients (49.8%) receiving a propofol  
53 dominant strategy, 356 patients (12.5%) receiving a midazolam dominant strategy and 1069 patients (37.7%)  
54 receiving a fentanyl dominant strategy. For those receiving propofol dominant sedation, it was common to receive a  
55  
56  
57  
58  
59  
60

1  
2  
3 single agent of only propofol (62.8%). While among those receiving fentanyl and midazolam dominant sedation  
4 strategies, single agent use was less common with 14.8% and 34.8% only receiving a single agent, respectively.”  
5  
6 Most patients were male (60.7%) with a median age of 57 (IQR 43-68) years and admitted for a medical reason  
7 (50.4%). The median Charlson comorbidity score was 1 (IQR 0-2), admission SOFA score 7 (IQR 4-9) and  
8 admission APACHE II score 19 (IQR 14-25). Patients who received a midazolam dominant sedation strategy were  
9 more likely admitted for medical reasons (72.8%) and had higher Charlson comorbidity scores, admission SOFA  
10 scores and admission APACHE II scores than those receiving propofol and fentanyl dominant sedation strategies.  
11 Patients receiving midazolam dominant strategies were also more likely to receive vasoactive medications (68.8%)  
12 compared to those predominantly receiving propofol (45.3%) and fentanyl dominant sedation strategies (64.5%).  
13 (Table 1).  
14  
15  
16  
17  
18  
19  
20  
21

22 Due to missing patient characteristics for 5 patients (0.2%), propensity scores were calculated for 1,409  
23 patients receiving propofol dominant strategies, 1,067 patients receiving fentanyl dominant sedation strategies and  
24 356 patients receiving midazolam dominant sedation strategies. Of the patients receiving fentanyl dominant sedation  
25 strategies, 201 (18.8%) could not be matched to a patient receiving propofol dominant sedation strategies within the  
26 specified caliper width of 0.2; therefore, this resulted in a matched cohort for propofol and fentanyl of 1,732  
27 patients. Of the patients receiving midazolam dominant sedation strategies, all 356 patients could be matched to a  
28 patient receiving propofol dominant sedation strategies; therefore, this resulted in a matched cohort for patients with  
29 propofol and midazolam dominant sedation strategies of 712 patients. After matching, the baseline characteristics  
30 were balanced (Table 1). The median time from admission to first ICDSC in hours were similar between the  
31 propofol (median time = 17.1 hrs (IQR = 8.5-34.7)), midazolam (median time = 17.6 hrs (IQR = 8.8-41.2)) and  
32 fentanyl (median time = 16.5 hrs (8.8-35.4)) dominant strategies. Additionally, the median number of ICDSC  
33 assessments per ICU day was similar for propofol (1.4 (IQR = 1.0-1.8)), fentanyl (1.4 (IQR 1.0-1.8)), midazolam (1.3  
34 (IQR 1.0-1.7)) dominant sedation strategies.  
35  
36  
37  
38  
39  
40  
41  
42  
43  
44  
45  
46

47 In the propensity score-matched cohorts, there was a statistically significant association between delirium  
48 and midazolam dominant (odds ratio [OR] 1.46 (95% confidence interval 1.06-2.00);  $p=0.02$ ) as well as fentanyl  
49 dominant (OR 1.22 (95% CI 1.00-1.48);  $p=0.05$ ) sedation strategies compared to propofol dominant sedation  
50 strategies (Figure 2). To control for the effects of death on delirium rates, a sensitivity analysis of the matched cohort  
51 was performed using a composite outcome of delirium or death. A statistically significant association between the  
52  
53  
54  
55  
56  
57  
58  
59  
60



1  
2  
3 composite outcome of delirium and death with midazolam dominant(OR 1.53 (95% CI 1.10-2.12; p=0.011) and  
4  
5 fentanyl dominant(OR 1.27 (95% CI 1.04-1.55; p=0.020) strategies was observed, however not for propofol  
6  
7 dominant strategies. Sensitivity analyses based on the 7-category sedation strategy prior to the first ICDS  
8  
9 assessment showed an increased odds of delirium for those on more than one agent compared to those on propofol  
10  
11 only (Table 2). Among those who ever experienced delirium, the distribution of delirium subtypes was similar  
12  
13 between dominant sedation strategies (Table 3). Based on the propensity score-matched cohorts, a fentanyl  
14  
15 dominant sedation strategy was associated with longer duration of mechanical ventilation, longer ICU and hospital  
16  
17 LOS and more delirium days compared to a propofol dominant sedation strategy, while a midazolam dominant  
18  
19 sedation strategy was associated with a longer duration of mechanical ventilation compared to a propofol dominant  
20  
21 sedation strategy(Figure 3). Sensitivity analyses of the secondary outcomes and cohort characteristics based on the  
22  
23 7-category sedation strategy can be found in the supplementary results(Supplementary Digital Content - Table 1 &  
24  
25 Table 2, respectively). There was a statistically significant association between fentanyl dominant sedation strategy  
26  
27 and ICU(OR=1.50 (1.07-2.12)) and 30-day mortality(OR=1.35 (1.02-1.79)) in propensity score-matched  
28  
29 analyses(Supplementary Digital Content - Table 3). An additional sensitivity analysis of the same propensity score-  
30  
31 matched cohort evaluating sedation strategy dominance for greater than 6 hours can be found in Table 4. This  
32  
33 analysis demonstrated a statistically significant association between fentanyl dominant strategies and a composite of  
34  
35 delirium or death, ICU mortality, hospital mortality, 30 day mortality, 1 year mortality, hospital length of stay and  
36  
37 duration of mechanical ventilation.

### 38 *Discussion:*

39  
40 Sedative strategies may increase the risk of adverse patient complications such as delirium, or prolonged  
41  
42 mechanical ventilation. We found a midazolam dominant sedation strategy was associated with increased risk of  
43  
44 developing delirium, duration of mechanical ventilation, and a composite of delirium and death. Alternatively,  
45  
46 fentanyl was associated with multiple detrimental outcomes including an increased risk of delirium, a composite  
47  
48 outcome of delirium or death, ICU & hospital LOS and duration of mechanical ventilation.

49  
50 The association between benzodiazepine-based sedation strategies and delirium has been suggested in prior  
51  
52 literature<sup>8 17 18</sup>. The importance of these findings should not be understated as patients with delirium suffer  
53  
54 prolonged hospital stays, an increased risk of mortality and long term cognitive impairment<sup>7 8</sup>. Sedation using  
55  
56 multiple agents was also associated with increased delirium risk, duration of mechanical ventilation, ICU LOS and  
57  
58

1  
2  
3 hospital LOS. Whether these effects are a direct result from the sedation strategy, the resulting delirium or as a result  
4 of other aspects of their critical illness is unclear.  
5

6  
7 We also re-confirmed the association between midazolam dominant sedation strategies and longer  
8 mechanical ventilation but not mortality as reported by Lonardo *et al.*<sup>11</sup>. The mechanism between the association of  
9 benzodiazepines and mortality is unclear, however prolonged mechanical ventilation is a known risk factor for  
10 mortality<sup>28</sup>. A meta-analysis by Ho *et al.* comparing propofol to other sedation strategies did not demonstrate an  
11 impact on mortality; however, it did not specifically look at midazolam compared to other benzodiazepines<sup>29</sup>. The  
12 heterogeneity in mortality outcomes may be attributable to variation in sedation depth, as early deep sedation is an  
13 independent predictor of delayed time to extubation and long term mortality<sup>12</sup>. Therefore, not only agent choice but  
14 also sedation depth might contribute to the variation in mortality risk observed with benzodiazepines.  
15  
16  
17  
18  
19  
20  
21

22 Sedation with midazolam and fentanyl is often selected for patients with significant hemodynamic  
23 instability to avoid the negative inotropic and vasodilatory effects of propofol. In our study, those receiving  
24 midazolam dominant sedation strategies demonstrated significantly higher SOFA scores, APACHE II scores on  
25 admission and were more likely to receive vasoactive medications and continuous renal replacement. All of these  
26 may impact mortality when unaccounted for and may explain the heterogeneity observed in the literature<sup>30</sup>. For  
27 example, Lonardo *et al.* did not control for the presence of renal replacement which has been associated with a high  
28 rate of mortality in critically ill patients<sup>11 31</sup>. Our use of detailed clinical data for risk adjustment may help explain  
29 the differences in mortality compared to prior reports.  
30  
31  
32  
33  
34  
35  
36

37 A fentanyl dominant sedation strategy was significantly associated with an increased risk of delirium, a  
38 composite of delirium or death, ICU LOS, hospital LOS and duration of mechanical ventilation. Prior literature  
39 shows associations with delayed extubation when given in the first 48 hours, which supports our findings<sup>12</sup>. What is  
40 unclear is whether our result is a direct effect of fentanyl, an indirect effect from resulting complications of fentanyl  
41 use, for example a pulmonary embolism or pneumonia, or simply an observed association driven by an unidentified  
42 confounder. Fentanyl dominant strategies were associated with increased risk of ICU mortality, 30-day mortality,  
43 and at hospital discharge but not 1 year. It is difficult to know what to make of these observations. The relationship  
44 between fentanyl use and ICU mortality has been incompletely explored in the literature. The mortality risk  
45 associated with fentanyl use may be attributable to prolongations in mechanical ventilation<sup>28</sup>. In our data, the effect  
46 of mortality appeared strongest in those receiving only fentanyl and was less robust when used in combination. It is  
47  
48  
49  
50  
51  
52  
53  
54  
55  
56  
57  
58  
59  
60

1  
2  
3 possible those patients who received fentanyl monotherapy were more critically ill. The baseline characteristics of  
4 the fentanyl only subgroup revealed these patients that were older, had a higher vasopressor and CRRT use  
5 compared to a propofol only but not a midazolam only strategy (Table S3). However, when fentanyl was the  
6 dominant strategy for greater than 6 hours compared to the other two strategies, the association between fentanyl  
7 and negative patient centred outcomes was more consistent. This may suggest the detrimental association between  
8 fentanyl dominant strategies and patient centred outcomes observed is time dependent. Another possibility could be  
9 the immunomodulatory effects of narcotics. The mu-opioid receptor is expressed on macrophages and T-  
10 lymphocytes, and chronic administration may increase the risk of bacterial infection<sup>32-34</sup>. Therefore, large doses of  
11 fentanyl may contribute to further immune dysregulation thereby placing critically ill patients at risk of infection. A  
12 final possibility is the use of fentanyl in the provision of palliative symptom control, therefore the mortality  
13 association is a marker of this practice. Further study is required to better delineate the true nature of the association  
14 between fentanyl and deleterious patient outcomes in the ICU.

15  
16 Our studies strength is our large cohort size supported by granular patient detail extracted from a  
17 prospectively collected, clinical database representing multiple ICUs and the covariates were rigorously controlled  
18 using a propensity matched model<sup>22</sup>. The multicenter study design provides a pragmatic view of how sedation  
19 strategies are utilized in clinical practice. Limitations of our study include the possibility of confounding bias due to  
20 unmeasured impactful covariates or confounding by indication. Patients receiving midazolam dominant strategies  
21 were clearly more critically ill compared to those receiving propofol dominant strategies manifest by higher  
22 APACHE II scores, greater vasopressor requirements, and higher rates of renal replacement. To compensate, we  
23 conducted propensity score-matched analyses adjusted for known covariates. Additionally, fentanyl and midazolam  
24 are often used concurrently and teasing apart the isolated effects of each medication may be challenging. Adjustment  
25 with our statistical model should minimize this effect, however, it is possible that unrecognized confounders which  
26 are not accounted for in the model could introduce unrecognized bias. Randomized controlled trials would better  
27 assess this limitation.

28  
29 Moreover, we focused primarily on the presence or absence of continuous infusions and did not quantify  
30 the impact of independent drug boluses. However, this effect would lessen the association with our primary outcome  
31 suggesting our observed associations are conservative. Another limitation is the use of drug duration as a surrogate  
32 for the impact of the sedation strategy rather than in vivo plasma concentrations. Patient factors may impact

1  
2  
3 midazolam metabolism due to differences in age, hepatic or renal dysfunction or co-administration of medications  
4 with similar metabolic pathways<sup>35-37</sup>. Finally, the definition of dominant sedation strategy based on longest duration  
5 of infusion prior to first ICDSC may be considered arbitrary. It is also possible that the current definition classifies  
6 some patients as having one dominant sedation strategy when multiple infusions were discontinued in a noticeably  
7 short time frame. However, defining sedation in the setting of multiple agents has been incompletely explored in the  
8 literature, therefore novel definitions are required. Our data closely reflects multiple findings previously reported  
9 with both midazolam and fentanyl sedation. Furthermore, when restricted to patients who received a dominant  
10 sedation strategy for greater than 6 hours, the association between fentanyl dominant strategies and negative patient  
11 outcomes was more apparent. This reduces the possibility our findings are pure chance. When thresholds for longer  
12 durations of sedation dominance were used, the effects became inconsistent, however may be secondary to the  
13 effects of statistical analysis on progressively smaller populations.  
14  
15  
16  
17  
18  
19  
20  
21  
22  
23

#### 24 *Conclusion:*

25  
26 This multi-center, propensity score-matched cohort study demonstrates a novel association between fentanyl  
27 dominant sedation strategies and negative outcomes in the ICU. Fentanyl dominant sedation strategies were  
28 associated with an increased risk of delirium, a composite of delirium or death, duration of ventilation, ICU LOS  
29 and hospital LOS. We also confirmed previous reports including an increased risk of delirium and duration of  
30 mechanical ventilation with midazolam dominant sedation strategies. This study highlights the need for additional  
31 research to further evaluate potentially negative effects of fentanyl and midazolam based sedation strategies.  
32  
33  
34  
35  
36  
37  
38  
39

#### 40 Sources of Funding:

41 This project was unfunded.  
42  
43  
44

#### 45 Disclosures:

46 The authors have no conflicts of interest.  
47  
48  
49

#### 50 Acknowledgements:

51  
52  
53  
54  
55  
56  
57  
58  
59  
60

1  
2  
3 The authors would like to thank the Hotchkiss Brain institute, the O'Brien Institute for Public Health, and the  
4 University of Calgary Departments of Critical Care, Community Health Sciences and Psychiatry for their on-going  
5 support. Moreover, we would like to thank the reviewers and editorial team for their hard work and consideration.  
6  
7  
8  
9

10 Contributorship Statement: Dr CC was involved in the concept, study protocol, study oversight, statistical modeling,  
11 and all aspects of writing the manuscript. Drs AS & CHL were involved in the statistical modeling and contributed  
12 to the methods section of the manuscript. Drs KF, DN, TS, PC were involved in developing the concept, study  
13 protocol, study oversight and contributed to the discussion of the manuscript.  
14  
15  
16  
17  
18  
19

20 Data Sharing Statement: Raw data were generated at the University of Calgary. Derived data supporting the findings  
21 of this study are available from the corresponding author CC on request.  
22  
23  
24  
25

#### 26 References:

- 27  
28 1. Association AP. Diagnostic and Statistical Manual of Mental Disorders(DSM-5). Arlington, VA:  
29 American Psychiatric Association 2013.
- 30 2. Ely EW, Inouye SK, Bernard GR, et al. Delirium in mechanically ventilated patients: validity  
31 and reliability of the confusion assessment method for the intensive care unit (CAM-  
32 ICU). *JAMA* 2001;286(21):2703-10.
- 33 3. Dubois MJ, Bergeron N, Dumont M, et al. Delirium in an intensive care unit: a study of risk  
34 factors. *Intensive Care Med* 2001;27(8):1297-304.
- 35 4. Pandharipande P, Cotton BA, Shintani A, et al. Prevalence and risk factors for development of  
36 delirium in surgical and trauma intensive care unit patients. *J Trauma* 2008;65(1):34-41.  
37 doi: 10.1097/TA.0b013e31814b2c4d
- 38 5. Girard TD, Kress JP, Fuchs BD, et al. Efficacy and safety of a paired sedation and ventilator  
39 weaning protocol for mechanically ventilated patients in intensive care (Awakening and  
40 Breathing Controlled trial): a randomised controlled trial. *Lancet* 2008;371(9607):126-  
41 34. doi: 10.1016/S0140-6736(08)60105-1
- 42 6. Zaal IJ, Devlin JW, Peelen LM, et al. A systematic review of risk factors for delirium in the ICU.  
43 *Crit Care Med* 2015;43(1):40-7. doi: 10.1097/CCM.0000000000000625
- 44 7. Thomason JW, Shintani A, Peterson JF, et al. Intensive care unit delirium is an independent  
45 predictor of longer hospital stay: a prospective analysis of 261 non-ventilated patients.  
46 *Crit Care* 2005;9(4):R375-81. doi: 10.1186/cc3729
- 47 8. Ely E, Shintani A, Truman B, et al. Delirium as a predictor of mortality in mechanically  
48 ventilated patients in the intensive care unit. . *JAMA* 2004;291(14):1753-62.  
49  
50  
51  
52  
53  
54  
55  
56  
57  
58  
59  
60

- 1  
2  
3 9. Needham DM, Bronskill SE, Calinawan JR, et al. Projected incidence of mechanical ventilation  
4 in Ontario to 2026: Preparing for the aging baby boomers. *Crit Care Med*  
5 2005;33(3):574-9.
- 6  
7 10. Jacobs P, Noseworthy TW. National estimates of intensive care utilization and costs: Canada  
8 and the United States. *Crit Care Med* 1990;18(11):1282-6.
- 9  
10 11. Lonardo NW, Mone MC, Nirula R, et al. Propofol is associated with favorable outcomes  
11 compared with benzodiazepines in ventilated intensive care unit patients. *Am J Respir*  
12 *Crit Care Med* 2014;189(11):1383-94. doi: 10.1164/rccm.201312-2291OC
- 13  
14 12. Shehabi Y, Bellomo R, Reade MC, et al. Early intensive care sedation predicts long-term  
15 mortality in ventilated critically ill patients. *Am J Respir Crit Care Med* 2012;186(8):724-  
16 31. doi: 10.1164/rccm.201203-0522OC
- 17  
18 13. Riker RR, Shehabi Y, Bokesch PM, et al. Dexmedetomidine vs midazolam for sedation of  
19 critically ill patients: a randomized trial. *JAMA* 2009;301(5):489-99. doi:  
20 10.1001/jama.2009.56
- 21  
22 14. R B-v, Mar Sanchez-Soria M, Morales-Garcia C, et al. Prolonged sedation of critically ill  
23 patients with midazolam or propofol: impact on weaning and costs. *Crit Care Med*  
24 1997;25(1):33-40.
- 25  
26 15. Aitkenhead AR, Pepperman ML, Willatts SM, et al. Comparison of propofol and midazolam  
27 for sedation in critically ill patients. *Lancet* 1989;2(8665):704-9.
- 28  
29 16. Chamorro C, de Latorre FJ, Montero A, et al. Comparative study of propofol versus  
30 midazolam in the sedation of critically ill patients: results of a prospective, randomized,  
31 multicenter trial. *Crit Care Med* 1996;24(6):932-9.
- 32  
33 17. Barr J, Fraser GL, Puntillo K, et al. Clinical practice guidelines for the management of pain,  
34 agitation, and delirium in adult patients in the intensive care unit. *Crit Care Med*  
35 2013;41(1):263-306. doi: 10.1097/CCM.0b013e3182783b72
- 36  
37 18. Pandhairpande P, Shintani A, Peterson J, et al. Lorazepam is an independent risk factor for  
38 transitioning to delirium in intensive care unit patients. *Anesthesiology* 2006;104(1):21-  
39 26.
- 40  
41 19. Cammarano WB, Pittet JF, Weitz S, et al. Acute withdrawal syndrome related to the  
42 administration of analgesic and sedative medications in adult intensive care unit  
43 patients. *Crit Care Med* 1998;26(4):676-84.
- 44  
45 20. von Elm E, Altman DG, Egger M, et al. The Strengthening the Reporting of Observational  
46 Studies in Epidemiology (STROBE) statement: guidelines for reporting observational  
47 studies. *The Lancet* 2007;370(9596):1453-57. doi: 10.1016/s0140-6736(07)61602-x
- 48  
49 21. Chiasson TC, Manns BJ, Stelfox HT. An economic evaluation of venous thromboembolism  
50 prophylaxis strategies in critically ill trauma patients at risk of bleeding. *PLoS Med*  
51 2009;6(6):e1000098. doi: 10.1371/journal.pmed.1000098
- 52  
53 22. Brundin-Mather R, Soo A, Zuege DJ, et al. Secondary EMR data for quality improvement and  
54 research: A comparison of manual and electronic data collection from an integrated  
55 critical care electronic medical record system. *J Crit Care* 2018;47:295-301. doi:  
56 10.1016/j.jcrc.2018.07.021
- 57  
58 23. Stelfox HT, Soo A, Niven DJ, et al. Assessment of the Safety of Discharging Select Patients  
59 Directly Home From the Intensive Care Unit: A Multicenter Population-Based Cohort  
60 Study. *JAMA Intern Med* 2018;178(10):1390-99. doi: 10.1001/jamainternmed.2018.3675

- 1  
2  
3 24. Sessler CN, Gosnell MS, Grap MJ, et al. The Richmond Agitation-Sedation Scale: validity and  
4 reliability in adult intensive care unit patients. *Am J Respir Crit Care Med*  
5 2002;166(10):1338-44. doi: 10.1164/rccm.2107138  
6  
7 25. Bergeron N, Dubois MJ, Dumont M, et al. Intensive Care Delirium Screening Checklist:  
8 evaluation of a new screening tool. *Intensive Care Med* 2001;27(5):859-64.  
9  
10 26. Austin PC. Optimal caliper widths for propensity-score matching when estimating  
11 differences in means and differences in proportions in observational studies. *Pharm Stat*  
12 2011;10(2):150-61. doi: 10.1002/pst.433  
13  
14 27. Team RC. R: A language and environment for statistical computing. . 2018  
15 28. Feng Y, Amoateng-Adjepong Y, Kaufman D, et al. Age, duration of mechanical ventilation,  
16 and outcomes of patients who are critically ill. *Chest* 2009;136(3):759-64. doi:  
17 10.1378/chest.09-0515  
18 29. Ho KM, Ng JY. The use of propofol for medium and long-term sedation in critically ill adult  
19 patients: a meta-analysis. *Intensive Care Med* 2008;34(11):1969-79. doi:  
20 10.1007/s00134-008-1186-5  
21  
22 30. Soo A, Zuege DJ, Fick GH, et al. Describing organ dysfunction in the intensive care unit: a  
23 cohort study of 20,000 patients. *Crit Care* 2019;23(1):186. doi: 10.1186/s13054-019-  
24 2459-9  
25  
26 31. Uchino S, Kellum JA, Bellomo R, et al. Acute renal failure in critically ill patients: a  
27 multinational, multicenter study. *JAMA* 2005;294(7):813-8. doi: 10.1001/jama.294.7.813  
28  
29 32. Risdahl JM, Khanna KV, Peterson PK, et al. Opiates and infection. *J Neuroimmunol*  
30 1998;83(1-2):4-18.  
31  
32 33. Roy S, Loh HH. Effects of opioids on the immune system. *Neurochem Res* 1996;21(11):1375-  
33 86.  
34 34. Roy S, Wang J, Kelschenbach J, et al. Modulation of immune function by morphine:  
35 implications for susceptibility to infection. *J Neuroimmune Pharmacol* 2006;1(1):77-89.  
36 doi: 10.1007/s11481-005-9009-8  
37  
38 35. Barr J, Zomorodi K, Bertaccini EJ, et al. A double-blind, randomized comparison of i.v.  
39 lorazepam versus midazolam for sedation of ICU patients via a pharmacologic model.  
40 *Anesthesiology* 2001;95(2):286-98.  
41  
42 36. Swart EL, Zuideveld KP, de Jongh J, et al. Comparative population pharmacokinetics of  
43 lorazepam and midazolam during long-term continuous infusion in critically ill patients.  
44 *Br J Clin Pharmacol* 2004;57(2):135-45.  
45  
46 37. Oldenhof H, de Jong M, Steenhoek A, et al. Clinical pharmacokinetics of midazolam in  
47 intensive care patients, a wide interpatient variability? *Clin Pharmacol Ther*  
48 1988;43(3):263-9.

48 Tables:

51 **Table 1: Baseline Characteristics**

|  | Overall cohort    |                   |                   | Dominant sedation strategy matched cohorts |                   |                                      |                  |
|--|-------------------|-------------------|-------------------|--------------------------------------------|-------------------|--------------------------------------|------------------|
|  |                   |                   |                   | Propofol vs. Midazolam matched cohort      |                   | Propofol vs. Fentanyl matched cohort |                  |
|  | Propofol (n=1412) | Fentanyl (n=1069) | Midazolam (n=356) | Propofol (n=356)                           | Midazolam (n=356) | Propofol (n=866)                     | Fentanyl (n=866) |

| Characteristic                              |             |             |             |            |            |            |            |
|---------------------------------------------|-------------|-------------|-------------|------------|------------|------------|------------|
| Age, median (IQR)                           | 56 (42-67)  | 59 (44-69)  | 59 (46-71)  | 58 (48-69) | 59 (46-71) | 57 (46-68) | 57 (42-69) |
| Male, n (%)                                 | 843 (59.7)  | 656 (61.4)  | 223 (62.6)  | 227 (63.8) | 223 (62.6) | 533 (61.5) | 520 (60.0) |
| Admission reason, n (%)                     |             |             |             |            |            |            |            |
| Medical                                     | 791 (56.0)  | 379 (35.5)  | 259 (72.8)  | 253 (71.1) | 259 (72.8) | 426 (49.2) | 379 (43.8) |
| Surgical                                    | 265 (18.8)  | 405 (37.9)  | 69 (19.4)   | 74 (20.8)  | 69 (19.4)  | 256 (29.6) | 248 (28.6) |
| Neurological                                | 245 (17.4)  | 73 (6.8)    | 19 (5.3)    | 18 (5.1)   | 19 (5.3)   | 76 (8.8)   | 73 (8.4)   |
| Trauma                                      | 109 (7.7)   | 211 (19.7)  | 9 (2.5)     | 11 (3.1)   | 9 (2.5)    | 108 (12.5) | 166 (19.2) |
| Location admitted from                      |             |             |             |            |            |            |            |
| Emergency Room                              | 833 (59.0%) | 413 (38.6%) | 190 (53.4%) | 202 (56.7) | 190 (53.4) | 441 (50.9) | 369 (42.6) |
| Operating Room/Recovery                     | 278 (19.7%) | 399 (37.3%) | 59 (16.6%)  | 63 (17.7)  | 59 (16.6)  | 232 (26.8) | 271 (31.3) |
| Hospital Ward                               | 254 (18.0%) | 209 (19.6%) | 91 (25.6%)  | 85 (23.9)  | 91 (25.6)  | 165 (19.1) | 180 (20.8) |
| Another Hospital                            | 26 (1.8%)   | 24 (2.2%)   | 7 (2.0%)    | 4 (1.1)    | 7 (2.0)    | 17 (2.0)   | 23 (2.7)   |
| Other                                       | 21 (1.5%)   | 24 (2.2%)   | 9 (2.5%)    | 2 (0.6)    | 9 (2.5)    | 11 (1.3)   | 23 (2.7)   |
| Charlson score, n (%)                       |             |             |             |            |            |            |            |
| 0                                           | 582 (41.2%) | 422 (39.5%) | 121 (34.0%) | 127 (35.7) | 121 (34.0) | 322 (37.2) | 336 (38.8) |
| 1                                           | 317 (22.5%) | 239 (22.4%) | 70 (19.7%)  | 61 (17.1)  | 70 (19.7)  | 201 (23.2) | 207 (23.9) |
| 2+                                          | 513 (36.3%) | 408 (38.2%) | 165 (46.3%) | 168 (47.2) | 165 (46.3) | 343 (39.6) | 323 (37.3) |
| Charlson score, median (IQR)                | 1 (0-2)     | 1 (0-2)     | 1 (0-3)     | 1 (0-3)    | 1 (0-3)    | 1 (0-3)    | 1 (0-2)    |
| Admission SOFA score, median (IQR)          | 6 (4-8)     | 7 (5-10)    | 8 (6-11)    | 8 (5-10)   | 8 (6-11)   | 7 (4-9)    | 7 (4-10)   |
| Admission APACHE II score, median (IQR)     | 18 (13-24)  | 19 (14-25)  | 23 (16-28)  | 21 (16-27) | 23 (16-28) | 19 (14-24) | 19 (13-26) |
| Vasoactive medications, n (%)               | 639 (45.3%) | 690 (64.5%) | 245 (68.8%) | 241 (67.7) | 245 (68.8) | 526 (60.7) | 488 (56.4) |
| Continuous renal replacement therapy, n (%) | 59 (4.2%)   | 78 (7.3%)   | 33 (9.3%)   | 28 (7.9)   | 33 (9.3)   | 52 (6.0)   | 73 (8.4)   |

**Table 2: Sensitivity Analyses examining the relationship between delirium and individual sedation agents prior to first ICDSC assessment**

| Sedation agent prior to first ICDSC assessment | Overall Cohort     |                      |                                   | Matched cohorts              |                                     |                      |                                      |
|------------------------------------------------|--------------------|----------------------|-----------------------------------|------------------------------|-------------------------------------|----------------------|--------------------------------------|
|                                                | Number of patients | Ever Delirium, n (%) | Adjusted OR (95% CI) <sup>1</sup> | Number of patients per group | Ever Delirium for propofol patients | Ever Delirium, n (%) | Propensity score-matched OR for Ever |
|                                                |                    |                      |                                   |                              |                                     |                      |                                      |



|                      |     |            |                        |                  | from matched cohorts, n (%) |                  | delirium(95% CI) <sup>2</sup> |
|----------------------|-----|------------|------------------------|------------------|-----------------------------|------------------|-------------------------------|
| Propofol             | 887 | 509 (57.4) | 1.00 (reference group) | N/A <sup>3</sup> | N/A <sup>3</sup>            | N/A <sup>3</sup> | 1.00 (reference group)        |
| Fentanyl             | 158 | 91 (57.6)  | 1.04 (0.71-1.52)       | 152              | 74 (48.7)                   | 87 (57.2)        | 1.41 (0.90-2.22)              |
| Midazolam            | 124 | 77 (62.1)  | 1.11 (0.73-1.69)       | 122              | 69 (56.6)                   | 75 (61.5)        | 1.23 (0.74-2.05)              |
| Propofol + Fentanyl  | 854 | 543 (63.6) | 1.32 (1.06-1.65)       | 565              | 323 (57.2)                  | 347 (61.4)       | 1.19 (0.94-1.51)              |
| Propofol + Midazolam | 224 | 163 (72.8) | 1.72 (1.23-2.43)       | 223              | 143 (64.1)                  | 162 (72.6)       | 1.49 (1.00-2.23)              |
| Fentanyl + Midazolam | 222 | 160 (72.1) | 1.72 (1.22-2.46)       | 214              | 119 (55.6)                  | 153 (71.5)       | 2.00 (1.34-3.00)              |
| All 3                | 368 | 269 (73.1) | 1.84 (1.38-2.47)       | 335              | 199 (59.4)                  | 241 (71.9)       | 1.75 (1.27-2.42)              |

**Table 3: Delirium subtype by dominant sedation strategy prior to first ICDS assessment among patients experiencing delirium for the propensity score-matched cohorts**

|                                     | Dominant sedation strategy                                          |                  |                                                                      |                   |
|-------------------------------------|---------------------------------------------------------------------|------------------|----------------------------------------------------------------------|-------------------|
|                                     | Propofol vs. Fentanyl matched cohort patients experiencing delirium |                  | Propofol vs. Midazolam matched cohort patients experiencing delirium |                   |
| Delirium Subtype                    | Propofol (n=529)                                                    | Fentanyl (n=569) | Propofol (n=228)                                                     | Midazolam (n=257) |
| Hyperactive only, n (%)             | 47 (8.9)                                                            | 40 (7.0)         | 15 (6.6)                                                             | 25 (9.7)          |
| Hypoactive only, n (%)              | 210 (39.7)                                                          | 228 (40.1)       | 104 (45.6)                                                           | 106 (41.2)        |
| Mixed, n (%)                        | 254 (48.0)                                                          | 289 (50.8)       | 103 (45.2)                                                           | 123 (47.9)        |
| Unable to assess or classify, n (%) | 18 (3.4)                                                            | 12 (2.1)         | 6 (2.6)                                                              | 3 (1.2)           |

**Table 4: Sensitivity analyses based on those on a single sedation strategy or those whose sedation strategy was dominant for  $\geq 6$  hours over the other 2 strategies.**

| Outcome                              | Dominant Sedation Strategy | Propensity score-matched odds ratio, mean ratio or rate ratio (95% CI) <sup>1</sup> |
|--------------------------------------|----------------------------|-------------------------------------------------------------------------------------|
| Delirium ever                        | Propofol                   | 1.00 (reference group)                                                              |
|                                      | Fentanyl(n=476)            | 1.29 (0.99-1.69)                                                                    |
|                                      | Midazolam(n=231)           | <b>1.64 (1.12-2.41)</b>                                                             |
| Delirium or ICU death                | Propofol                   | 1.00 (reference group)                                                              |
|                                      | Fentanyl(n=476)            | <b>1.38 (1.05-1.81)</b>                                                             |
|                                      | Midazolam(n=231)           | <b>1.75 (1.18-2.60)</b>                                                             |
| ICU Mortality                        | Propofol                   | 1.00 (reference group)                                                              |
|                                      | Fentanyl(n=476)            | <b>1.82 (1.18-2.84)</b>                                                             |
|                                      | Midazolam(n=231)           | 1.31 (0.73-2.39)                                                                    |
| Hospital Mortality                   | Propofol                   | 1.00 (reference group)                                                              |
|                                      | Fentanyl(n=476)            | <b>1.69 (1.19-2.42)</b>                                                             |
|                                      | Midazolam(n=231)           | 1.50 (0.92-2.49)                                                                    |
| Died within 30 days of ICU admission | Propofol                   | 1.00 (reference group)                                                              |
|                                      | Fentanyl(n=476)            | <b>1.84 (1.27-2.68)</b>                                                             |
|                                      | Midazolam(n=231)           | 1.14 (0.69-1.89)                                                                    |
| Died within 1 year of ICU admission  | Propofol                   | 1.00 (reference group)                                                              |
|                                      | Fentanyl(n=476)            | <b>1.38 (1.02-1.86)</b>                                                             |

|                                                       |                  |                         |
|-------------------------------------------------------|------------------|-------------------------|
|                                                       | Midazolam(n=231) | 1.16 (0.77-1.76)        |
| Died within 1.5 years of ICU admission                | Propofol         | 1.00 (reference group)  |
|                                                       | Fentanyl(n=476)  | 1.25 (0.94-1.66)        |
|                                                       | Midazolam(n=231) | 1.25 (0.84-1.85)        |
| ICU length of stay, mean ratio (95% CI)               | Propofol         | 1.00 (reference group)  |
|                                                       | Fentanyl(n=476)  | <b>1.23 (1.09-1.39)</b> |
|                                                       | Midazolam(n=231) | 1.01 (0.86-1.20)        |
| Hospital length of stay, mean ratio (95% CI)          | Propofol         | 1.00 (reference group)  |
|                                                       | Fentanyl(n=476)  | <b>1.31 (1.13-1.51)</b> |
|                                                       | Midazolam(n=231) | 1.01 (0.83-1.22)        |
| Duration of invasive ventilation, mean ratio (95% CI) | Propofol         | 1.00 (reference group)  |
|                                                       | Fentanyl(n=476)  | <b>1.35 (1.14-1.59)</b> |
|                                                       | Midazolam(n=231) | 1.17 (0.94-1.46)        |
| Number of delirium days, rate ratio (95% CI)          | Propofol         | 1.00 (reference group)  |
|                                                       | Fentanyl(n=476)  | 1.19 (0.99-1.43)        |
|                                                       | Midazolam(n=231) | 1.11 (0.85-1.44)        |

<sup>1</sup>Data presented as odds ratios unless otherwise indicated.

Figure Legends:

**Figure 1: Cohort diagram**

**Figure 2: Propensity score-matched odds ratios of delirium by dominant sedation strategy prior to first ICDS assessment**

**Figure 3: Forest plot of propensity score-matched mean or rate ratios of secondary outcomes and sedation strategy**

**Figure 1: Cohort diagram**

**Figure 2: Propensity score-matched odds ratios of delirium by dominant sedation strategy prior to first ICDSC assessment**



Peer review only

**Figure 3: Forest plot of propensity score-matched mean or rate ratios of secondary outcomes and sedation strategy**



**Table S1: Secondary outcomes by sedation strategy prior to first ICDS assessment**

| <b>Propensity score-matched mean ratio or rate ratio (95% CI)<sup>1</sup></b> | <b>ICU LOS</b>          | <b>Hospital LOS</b>     | <b>Duration of invasive ventilation</b> | <b>Number of delirium days</b> |
|-------------------------------------------------------------------------------|-------------------------|-------------------------|-----------------------------------------|--------------------------------|
| Sedation prior to first ICDS assessment                                       |                         |                         |                                         |                                |
| Propofol                                                                      | 1.00 (reference group)  | 1.00 (reference group)  | 1.00 (reference group)                  | 1.00 (reference group)         |
| Fentanyl                                                                      | 1.06 (0.85-1.33)        | 1.25 (0.97-1.61)        | 1.00 (0.74-1.35)                        | 1.03 (0.69-1.55)               |
| Midazolam                                                                     | 0.83 (0.65-1.06)        | 0.98 (0.75-1.28)        | 1.00 (0.73-1.38)                        | 0.88 (0.59-1.31)               |
| Propofol + Fentanyl                                                           | <b>1.17 (1.05-1.30)</b> | <b>1.20 (1.05-1.38)</b> | <b>1.37 (1.18-1.58)</b>                 | 1.08 (0.90-1.31)               |
| Propofol + Midazolam                                                          | 1.16 (0.99-1.36)        | 0.86 (0.68-1.08)        | <b>1.59 (1.28-1.99)</b>                 | 1.11 (0.87-1.41)               |
| Fentanyl + Midazolam                                                          | <b>1.40 (1.17-1.67)</b> | <b>1.27 (1.02-1.57)</b> | <b>1.95 (1.54-2.46)</b>                 | 1.28 (0.97-1.69)               |
| All 3                                                                         | <b>1.73 (1.52-1.98)</b> | <b>1.39 (1.18-1.63)</b> | <b>2.47 (2.06-2.97)</b>                 | <b>1.35 (1.10-1.67)</b>        |

<sup>1</sup>Propensity score based on age, sex, admission class, Charlson comorbidity category (0, 1, 2+), admission APACHE II score, vasoactive medications, continuous renal replacement therapy. 1:1 nearest-neighbor matching without replacement using the logit of the propensity score and specified caliper width equal to 0.2 of the standard deviation of the logit of the propensity score

**Table S2: Propensity score matched models of the relationship between mortality outcomes and dominant sedation strategy prior to first ICDSC assessment**

| <b>Outcome</b>                                | <b>Dominant Sedation Strategy</b> | <b>Mortality, n (%)</b> | <b>Propensity score-matched OR (95% CI)<sup>2</sup></b> |
|-----------------------------------------------|-----------------------------------|-------------------------|---------------------------------------------------------|
| <b>ICU Mortality</b>                          | Propofol                          | 94 (6.7)                | 1.00 (reference)                                        |
|                                               | Fentanyl                          | 104 (9.7)               | <b>1.50 (1.07-2.12)</b>                                 |
|                                               | Midazolam                         | 39 (11.0)               | 1.20 (0.74-1.97)                                        |
| <b>Hospital Mortality</b>                     | Propofol                          | 157 (11.1)              | 1.00 (reference)                                        |
|                                               | Fentanyl                          | 166 (15.5)              | 1.27 (0.97-1.67)                                        |
|                                               | Midazolam                         | 59 (16.6)               | 1.14 (0.76-1.70)                                        |
| <b>Died within 30 days of ICU admission</b>   | Propofol                          | 148 (10.5)              | 1.00 (reference)                                        |
|                                               | Fentanyl                          | 148 (13.8)              | <b>1.35 (1.02-1.79)</b>                                 |
|                                               | Midazolam                         | 50 (14.0)               | 1.02 (0.67-1.57)                                        |
| <b>Died within 1 year of ICU admission</b>    | Propofol                          | 268 (19.0)              | 1.00 (reference)                                        |
|                                               | Fentanyl                          | 248 (23.2)              | 1.13 (0.90-1.43)                                        |
|                                               | Midazolam                         | 91 (25.6)               | 1.01 (0.72-1.42)                                        |
| <b>Died within 1.5 years of ICU admission</b> | Propofol                          | 308 (21.8)              | 1.00 (reference)                                        |
|                                               | Fentanyl                          | 276 (25.8)              | 1.12 (0.90-1.40)                                        |
|                                               | Midazolam                         | 109 (30.6)              | 1.01 (0.74-1.39)                                        |

Supplementary Table 3: Table of baseline characteristics for sensitivity analyses

|                         | Propofol<br>(n=887) | Fentanyl<br>(n=158) | Midazolam<br>(n=124) | Propofol<br>+<br>Fentanyl<br>(n=854) | Propofol +<br>Midazolam<br>(n=224) | Fentanyl +<br>Midazolam<br>(n=222) | All 3<br>(n=368) |
|-------------------------|---------------------|---------------------|----------------------|--------------------------------------|------------------------------------|------------------------------------|------------------|
| <b>Characteristic</b>   |                     |                     |                      |                                      |                                    |                                    |                  |
| Age, median (IQR)       | 58 (46-69)          | 64 (54-74)          | 66 (54-74)           | 55 (40-67)                           | 51 (35-60)                         | 61 (51-71)                         | 52 (40-65)       |
| Male, n (%)             | 506 (57.0)          | 79 (50.0)           | 79 (63.7)            | 532 (62.3)                           | 145 (64.7)                         | 133 (59.9)                         | 248 (67.4)       |
| Admission reason, n (%) |                     |                     |                      |                                      |                                    |                                    |                  |
| Medical                 | 518 (58.5)          | 59 (37.3)           | 87 (70.2)            | 236 (27.7)                           | 176 (78.6)                         | 121 (54.5)                         | 232 (63.0)       |
| Surgical                | 163 (18.4)          | 72 (45.6)           | 30 (24.2)            | 299 (35.1)                           | 7 (3.1)                            | 81 (36.5)                          | 87 (23.6)        |
| Neurological            | 169 (19.1)          | 10 (6.3)            | 6 (4.8)              | 102 (12.0)                           | 37 (16.5)                          | 3 (1.4)                            | 10 (2.7)         |
| Trauma                  | 35 (4.0)            | 17 (10.8)           | 1 (0.8)              | 216 (25.3)                           | 4 (1.8)                            | 17 (7.7)                           | 39 (10.6)        |
| Location admitted from  |                     |                     |                      |                                      |                                    |                                    |                  |
| Emergency Room          | 520 (58.6)          | 53 (33.5)           | 49 (39.5)            | 367 (43.0)                           | 168 (75.0)                         | 93 (41.9)                          | 186 (50.5)       |
| Operating Room/Recovery | 170 (19.2)          | 62 (39.2)           | 27 (21.8)            | 320 (37.5)                           | 6 (2.7)                            | 65 (29.3)                          | 86 (23.4)        |
| Hospital Ward           | 166 (18.7)          | 39 (24.7)           | 43 (34.7)            | 140 (16.4)                           | 40 (17.9)                          | 49 (22.1)                          | 77 (20.9)        |
| Another Hospital        | 17 (1.9)            | 3 (1.9)             | 2 (1.6)              | 13 (1.5)                             | 7 (3.1)                            | 7 (3.2)                            | 8 (2.2)          |
| Other                   | 14 (1.6)            | 1 (0.6)             | 3 (2.4)              | 14 (1.6)                             | 3 (1.3)                            | 8 (3.6)                            | 11 (3.0)         |
| Charlson score, n (%)   |                     |                     |                      |                                      |                                    |                                    |                  |
| 0                       | 338 (38.1)          | 47 (29.7)           | 30 (24.2)            | 387 (45.3)                           | 106 (47.3)                         | 74 (33.3)                          | 143 (38.9)       |
| 1                       | 204 (23.0)          | 35 (22.2)           | 19 (15.3)            | 171 (20.0)                           | 55 (24.6)                          | 50 (22.5)                          | 92 (25.0)        |
| 2+                      | 345 (38.9)          | 76 (48.1)           | 75 (60.5)            | 296 (34.7)                           | 63 (28.1)                          | 98 (44.1)                          | 133 (36.1)       |



|                                             |            |            |            |            |            |            |            |
|---------------------------------------------|------------|------------|------------|------------|------------|------------|------------|
| Charlson score, median (IQR)                | 1 (0-3)    | 1 (0-3)    | 2 (1-4)    | 1 (0-2)    | 1 (0-2)    | 1 (0-3)    | 1 (0-2)    |
| Admission SOFA score, median (IQR)          | 6 (4-8)    | 8 (5-10)   | 8 (5-10)   | 6 (4-9)    | 7 (5-9)    | 9 (6-11)   | 8 (5-11)   |
| Admission APACHE II score, median (IQR)     | 18 (14-23) | 20 (15-26) | 23 (16-28) | 17 (12-22) | 20 (14-25) | 22 (16-29) | 21 (14-26) |
| Vasoactive medications, n (%)               | 356 (40.1) | 105 (66.5) | 81 (65.3)  | 477 (55.9) | 117 (52.2) | 175 (78.8) | 263 (71.5) |
| Continuous renal replacement therapy, n (%) | 35 (3.9)   | 10 (6.3)   | 9 (7.3)    | 41 (4.8)   | 7 (3.1)    | 32 (14.4)  | 36 (9.8)   |

STROBE Statement—Checklist of items that should be included in reports of *cohort studies*

|                              | Item No | Recommendation                                                                                                                                                                                                                                                                                                         | Page No                     |
|------------------------------|---------|------------------------------------------------------------------------------------------------------------------------------------------------------------------------------------------------------------------------------------------------------------------------------------------------------------------------|-----------------------------|
| <b>Title and abstract</b>    | 1       | (a) Indicate the study's design with a commonly used term in the title or the abstract<br>(b) Provide in the abstract an informative and balanced summary of what was done and what was found                                                                                                                          | 1, 2                        |
| <b>Introduction</b>          |         |                                                                                                                                                                                                                                                                                                                        |                             |
| Background/rationale         | 2       | Explain the scientific background and rationale for the investigation being reported                                                                                                                                                                                                                                   | 3                           |
| Objectives                   | 3       | State specific objectives, including any prespecified hypotheses                                                                                                                                                                                                                                                       | 3                           |
| <b>Methods</b>               |         |                                                                                                                                                                                                                                                                                                                        |                             |
| Study design                 | 4       | Present key elements of study design early in the paper                                                                                                                                                                                                                                                                | 4                           |
| Setting                      | 5       | Describe the setting, locations, and relevant dates, including periods of recruitment, exposure, follow-up, and data collection                                                                                                                                                                                        | 4                           |
| Participants                 | 6       | (a) Give the eligibility criteria, and the sources and methods of selection of participants. Describe methods of follow-up<br>(b) For matched studies, give matching criteria and number of exposed and unexposed                                                                                                      | 4                           |
| Variables                    | 7       | Clearly define all outcomes, exposures, predictors, potential confounders, and effect modifiers. Give diagnostic criteria, if applicable                                                                                                                                                                               | 5,6                         |
| Data sources/<br>measurement | 8*      | For each variable of interest, give sources of data and details of methods of assessment (measurement). Describe comparability of assessment methods if there is more than one group                                                                                                                                   | 4, 6                        |
| Bias                         | 9       | Describe any efforts to address potential sources of bias                                                                                                                                                                                                                                                              | 6                           |
| Study size                   | 10      | Explain how the study size was arrived at                                                                                                                                                                                                                                                                              | 5                           |
| Quantitative variables       | 11      | Explain how quantitative variables were handled in the analyses. If applicable, describe which groupings were chosen and why                                                                                                                                                                                           | 4,6                         |
| Statistical methods          | 12      | (a) Describe all statistical methods, including those used to control for confounding<br>(b) Describe any methods used to examine subgroups and interactions<br>(c) Explain how missing data were addressed<br>(d) If applicable, explain how loss to follow-up was addressed<br>(e) Describe any sensitivity analyses | 6,<br>Supplement<br>methods |
| <b>Results</b>               |         |                                                                                                                                                                                                                                                                                                                        |                             |
| Participants                 | 13*     | (a) Report numbers of individuals at each stage of study—eg numbers potentially eligible, examined for eligibility, confirmed eligible, included in the study, completing follow-up, and analysed<br>(b) Give reasons for non-participation at each stage<br>(c) Consider use of a flow diagram                        | 7,<br>Figure 1              |
| Descriptive data             | 14*     | (a) Give characteristics of study participants (eg demographic, clinical, social) and information on exposures and potential confounders<br>(b) Indicate number of participants with missing data for each variable of interest<br>(c) Summarise follow-up time (eg, average and total amount)                         | 4, 7<br>Table 1             |
| Outcome data                 | 15*     | Report numbers of outcome events or summary measures over time                                                                                                                                                                                                                                                         | 7<br>Table 2, 3,            |

1  
2  
3  
4  
5  
6  
7  
8  
9  
10  
11  
12  
13  
14  
15  
16  
17  
18  
19  
20  
21  
22  
23  
24  
25  
26  
27  
28  
29  
30  
31  
32  
33  
34  
35  
36  
37  
38  
39  
40  
41  
42  
43  
44  
45  
46  
47  
48  
49  
50  
51  
52  
53  
54  
55  
56  
57  
58  
59  
60

For peer review only

|    |                          |    |                                                                                                                                                                                                              |           |
|----|--------------------------|----|--------------------------------------------------------------------------------------------------------------------------------------------------------------------------------------------------------------|-----------|
| 1  | Main results             | 16 | (a) Give unadjusted estimates and, if applicable, confounder-adjusted estimates and their precision (eg, 95% confidence interval). Make clear which confounders were adjusted for and why they were included | Table 2,3 |
| 2  |                          |    | (b) Report category boundaries when continuous variables were categorized                                                                                                                                    |           |
| 3  |                          |    | (c) If relevant, consider translating estimates of relative risk into absolute risk for a meaningful time period                                                                                             |           |
| 4  | Other analyses           | 17 | Report other analyses done—eg analyses of subgroups and interactions, and sensitivity analyses                                                                                                               | 7         |
| 5  | <b>Discussion</b>        |    |                                                                                                                                                                                                              |           |
| 6  | Key results              | 18 | Summarise key results with reference to study objectives                                                                                                                                                     | 8         |
| 7  | Limitations              | 19 | Discuss limitations of the study, taking into account sources of potential bias or imprecision. Discuss both direction and magnitude of any potential bias                                                   | 10        |
| 8  | Interpretation           | 20 | Give a cautious overall interpretation of results considering objectives, limitations, multiplicity of analyses, results from similar studies, and other relevant evidence                                   | 8,9,10    |
| 9  | Generalisability         | 21 | Discuss the generalisability (external validity) of the study results                                                                                                                                        | 8,9,10    |
| 10 | <b>Other information</b> |    |                                                                                                                                                                                                              |           |
| 11 | Funding                  | 22 | Give the source of funding and the role of the funders for the present study and, if applicable, for the original study on which the present article is based                                                | 11        |

\*Give information separately for exposed and unexposed groups.

**Note:** An Explanation and Elaboration article discusses each checklist item and gives methodological background and published examples of transparent reporting. The STROBE checklist is best used in conjunction with this article (freely available on the Web sites of PLoS Medicine at <http://www.plosmedicine.org/>, Annals of Internal Medicine at <http://www.annals.org/>, and Epidemiology at <http://www.epidem.com/>). Information on the STROBE Initiative is available at <http://www.strobe-statement.org>.

# BMJ Open

## Sedation strategy and ICU Delirium: A multi-center, population-based propensity score-matched cohort study

|                                 |                                                                                                                                                                                                                                                                                                                                                                                                                                                                                                                                                                                                                                                                                    |
|---------------------------------|------------------------------------------------------------------------------------------------------------------------------------------------------------------------------------------------------------------------------------------------------------------------------------------------------------------------------------------------------------------------------------------------------------------------------------------------------------------------------------------------------------------------------------------------------------------------------------------------------------------------------------------------------------------------------------|
| Journal:                        | <i>BMJ Open</i>                                                                                                                                                                                                                                                                                                                                                                                                                                                                                                                                                                                                                                                                    |
| Manuscript ID                   | bmjopen-2020-045087.R3                                                                                                                                                                                                                                                                                                                                                                                                                                                                                                                                                                                                                                                             |
| Article Type:                   | Original research                                                                                                                                                                                                                                                                                                                                                                                                                                                                                                                                                                                                                                                                  |
| Date Submitted by the Author:   | 05-Jul-2021                                                                                                                                                                                                                                                                                                                                                                                                                                                                                                                                                                                                                                                                        |
| Complete List of Authors:       | Casault, Colin; University of Calgary Cumming School of Medicine, Department of Critical Care Medicine<br>Soo, Andrea; University of Calgary Cumming School of Medicine, Critical Care Medicine<br>Lee, Chel; University of Calgary Cumming School of Medicine, Department of Critical Care<br>Couillard, Philippe; University of Calgary Cumming School of Medicine, Critical Care Medicine<br>Niven, Daniel; University of Calgary Cumming School of Medicine, Critical Care Medicine<br>Stelfox, Tom; University of Calgary Cumming School of Medicine, Department of Critical Care<br>Fiest, Kirsten; University of Calgary Cumming School of Medicine, Critical Care Medicine |
| <b>Primary Subject Heading</b>: | Intensive care                                                                                                                                                                                                                                                                                                                                                                                                                                                                                                                                                                                                                                                                     |
| Secondary Subject Heading:      | Anaesthesia, Intensive care, Patient-centred medicine                                                                                                                                                                                                                                                                                                                                                                                                                                                                                                                                                                                                                              |
| Keywords:                       | Adult intensive & critical care < ANAESTHETICS, Health & safety < HEALTH SERVICES ADMINISTRATION & MANAGEMENT, Quality in health care < HEALTH SERVICES ADMINISTRATION & MANAGEMENT, Adult intensive & critical care < INTENSIVE & CRITICAL CARE, Delirium & cognitive disorders < PSYCHIATRY                                                                                                                                                                                                                                                                                                                                                                                      |
|                                 |                                                                                                                                                                                                                                                                                                                                                                                                                                                                                                                                                                                                                                                                                    |

SCHOLARONE™  
Manuscripts



I, the Submitting Author has the right to grant and does grant on behalf of all authors of the Work (as defined in the below author licence), an exclusive licence and/or a non-exclusive licence for contributions from authors who are: i) UK Crown employees; ii) where BMJ has agreed a CC-BY licence shall apply, and/or iii) in accordance with the terms applicable for US Federal Government officers or employees acting as part of their official duties; on a worldwide, perpetual, irrevocable, royalty-free basis to BMJ Publishing Group Ltd ("BMJ") its licensees and where the relevant Journal is co-owned by BMJ to the co-owners of the Journal, to publish the Work in this journal and any other BMJ products and to exploit all rights, as set out in our [licence](#).

The Submitting Author accepts and understands that any supply made under these terms is made by BMJ to the Submitting Author unless you are acting as an employee on behalf of your employer or a postgraduate student of an affiliated institution which is paying any applicable article publishing charge ("APC") for Open Access articles. Where the Submitting Author wishes to make the Work available on an Open Access basis (and intends to pay the relevant APC), the terms of reuse of such Open Access shall be governed by a Creative Commons licence – details of these licences and which [Creative Commons](#) licence will apply to this Work are set out in our licence referred to above.

Other than as permitted in any relevant BMJ Author's Self Archiving Policies, I confirm this Work has not been accepted for publication elsewhere, is not being considered for publication elsewhere and does not duplicate material already published. I confirm all authors consent to publication of this Work and authorise the granting of this licence.

1  
2  
3  
4  
5  
6  
7  
8  
9  
10  
11 Sedation strategy and ICU Delirium: A multi-center, population-based propensity score-matched cohort study  
12

13 Colin Casault<sup>a</sup>, MD; Andrea Soo<sup>a</sup>, PhD; Chel Hee Lee, PhD; Philippe Couillard<sup>a</sup>, MD; Daniel J Niven<sup>a,b</sup>, MD/PhD;  
14 Tom Stelfox<sup>a,b</sup>, MD/PhD; Kirsten M. Fiest<sup>a,b,c</sup>, PhD.  
15

16  
17  
18 a: Department of Critical Care Medicine, University of Calgary and Alberta Health Services, Calgary Alberta,  
19 Canada.

20 b: Department of Community Health Sciences and O'Brien Institute for Public Health, University of Calgary,  
21 Calgary, Alberta, Canada

22 c: Department of Psychiatry and Hotchkiss Brain Institute, University of Calgary, Calgary, Alberta, Canada  
23

24  
25 Address for Correspondence:

26 Colin Casault

27 Department of Critical Care, University of Calgary

28 Calgary, Alberta, Canada

29 T2N-1N4

30 (587) 432-6762

31 casaultc@gmail.com  
32

33 Abstract: 298 words

34 Manuscript: 356 words

35 Tables: 4

36 Figures: 3  
37

38  
39 Conflicts of Interest: No author has a conflict of interest to declare.  
40

41 Keywords: Delirium, ICU sedation, fentanyl sedation, midazolam sedation  
42  
43  
44  
45  
46  
47  
48  
49  
50  
51  
52  
53  
54  
55  
56  
57  
58  
59  
60

1  
2  
3  
4  
5 **Objectives:** We examined the relationship between dominant sedation strategy, risk of delirium, and patient-  
6 centered outcomes in adults admitted to intensive care units(ICUs).

7  
8 **Design:** Retrospective propensity-matched cohort study.

9  
10 **Setting:** Mechanically-ventilated adults ( $\geq 18$  years) admitted to four Canadian hospital medical/surgical ICUs from  
11 2014 – 2016 in Calgary, Alberta, Canada.

12  
13 **Participants:** 2837 mechanically-ventilated adults ( $\geq 18$  years) requiring admission to a medical/surgical ICU were  
14 evaluated for the relationship between sedation strategy and delirium.

15  
16 **Interventions:** None.

17  
18 **Primary and secondary outcome measures:** The primary exposure was dominant sedation strategy, defined as the  
19 sedative infusion, including midazolam, propofol or fentanyl, with the longest duration before the first delirium  
20 assessment. The primary outcome was 'ever delirium' identified using the Intensive Care Delirium Screening  
21 Checklist (ICDSC). Secondary outcomes included mortality, length of stay (LOS), ventilation duration, and days  
22 with delirium. The cohort was analyzed in two propensity score (patient characteristics and therapies received)  
23 matched cohorts (propofol vs. fentanyl and propofol vs. midazolam).

24  
25 **Results:** 2,837 patients (60.7% male; median age 57 years (interquartile range 43-68)) were considered for  
26 propensity matching. In propensity score-matched cohorts(propofol vs. midazolam, n=712; propofol vs. fentanyl,  
27 n=1,732), the odds of delirium were significantly higher with midazolam (odds ratio (OR) 1.46 (95% confidence  
28 interval(CI) 1.06-2.00)) and fentanyl (OR 1.22 (95% CI 1.00-1.48)) compared to propofol dominant sedation  
29 strategies. Dominant sedation strategy with midazolam and fentanyl were associated with a longer duration of  
30 ventilation compared to propofol. Fentanyl was also associated with increased ICU mortality(OR 1.50 (1.07-2.12))  
31 ICU and hospital LOS compared to a propofol dominant sedation strategy.

32  
33 **Conclusions:** We identified a novel association between fentanyl dominant sedation strategies and an increased risk  
34 of delirium, a composite outcome of delirium or death, duration of mechanical ventilation, ICU LOS, and hospital  
35 LOS. Midazolam dominant sedation strategies were associated with increased delirium risk and mechanical  
36 ventilation duration.

#### 37 38 **Article Summary:**

- 39 • We examine the effects of midazolam and fentanyl sedation strategies on delirium and patient-centered  
40 outcomes using a large cohort of general intensive care patients.
  - 41 • To reduce bias, we used a propensity score matching process on an extensive database.
  - 42 • One fundamental limitation is secondary to the concurrent use of multiple overlapping sedation strategies,  
43 which may impact the results.
  - 44 • Based on the limitations and the nature of cohort studies, this study as hypothesis-generating.
- 45  
46  
47  
48  
49  
50  
51  
52  
53  
54  
55  
56  
57  
58  
59  
60



### *Introduction:*

Delirium in critically ill patients is an acute confusional state marked by severe disorganization of cognition, fluctuating course, attentional deficit, and a disturbance of awareness<sup>1</sup>. Older age, severity of illness, presence of mechanical ventilation, coma, and sedative medications place over 50% of ICU patients at risk for developing delirium<sup>2-6</sup>. Delirium in the ICU is common and may prolong hospital stay, increase mortality risk and contribute to long-term cognitive impairment<sup>7,8</sup>. With a burgeoning elderly population, ICU admission requiring mechanical ventilation is estimated to increase by 80% by 2026; therefore understanding potential contributors to delirium is paramount<sup>9,10</sup>.

Over-sedation in the ICU, with benzodiazepines, in particular, may be harmful<sup>11,12</sup>. Prospective cohort and randomized controlled trials support shorter durations of mechanical ventilation, more rapid awakening with propofol or dexmedetomidine than midazolam<sup>13-17</sup>. Similarly, a population-based study by Lonardo *et al.* demonstrated higher mortality, longer duration of mechanical ventilation, and longer ICU length of stay (LOS) in patients managed with benzodiazepines compared to propofol<sup>11</sup>. Lonardo *et al.* postulated midazolam's mortality effect might be due to increased rates of delirium. Delirium is associated with mortality, and some evidence supports patients treated with benzodiazepines may demonstrate higher rates of delirium in the ICU<sup>8,13,18,19</sup>. However, the association between benzodiazepines and delirium is inconsistent<sup>6</sup>.

Sedation strategies often employ both a sedative, like propofol, and an analgesic, like fentanyl, simultaneously to achieve the desired effect. However, studies evaluating the clinical effects of these sedation strategies are lacking. Additional research is necessary to understand the effects of sedation strategies on delirium, hospital length of stay (LOS), and survival outcomes. Our study examined the relationship between dominant sedation strategy (continuously infused propofol, fentanyl, and/or midazolam), delirium, and important patient-centered outcomes, in a multi-center population-based sample of mechanically-ventilated adults admitted to ICU.

### *Methods:*

#### *Ethics Approval Statement:*

This retrospective cohort study was reported in compliance with the Strengthening the Reporting of Observational Studies in Epidemiology (STROBE) statement<sup>20</sup> and approved by the conjoint health research ethics board at the University of Calgary (REB17-0389).

#### *Patient & Public Involvement Statement:*

Neither patients, nor the public were not involved in the design, collection, compilation or completion of this research study.

*Study Setting & Population:*

We identified consecutive mechanical ventilated adults ( $\geq 18$  years) admitted to four medical-surgical ICUs in Calgary, Alberta, Canada between January 1, 2014, to June 30<sup>th</sup>, 2016. Patients were excluded if:

- 1) Their ICU electronic health data did not link to an appropriate inpatient (hospital) admission
- 2) They did not have any ICU admissions with at least 1 Intensive Care Delirium Screening Checklist (ICDSC) assessment (details described in the *Outcome Measures* section)
- 3) They were non-Alberta residents (to allow for mortality outcome follow-up post hospital discharge)
- 4) They did not receive at least 1 continuous infusion of midazolam, propofol or fentanyl prior to the first ICDSC assessment.
- 5) They were never invasively ventilated during their ICU stay.
- 6) They did not have a single dominant continuous infusion prior to the first ICDSC assessment (see definition of dominant sedation strategy in the *Exposure Measure* section below for further detail).

If the patient was readmitted to ICU more than once during the study period, then only the first admission with at least 1 ICDSC assessment was used. The ICUs are staffed by accredited intensive care physicians which provide mechanical ventilation, vasoactive medications, and invasive monitoring.

*Data sources:*

Study data was derived from three electronic databases<sup>21-23</sup>. eCritical Alberta, a database and electronic medical record, that prospectively captures detailed clinical and demographic information<sup>22</sup>. The discharge abstract database (DAD) captures data on all hospitalized patients, including admission date, discharge, survival status, and up to 25 diagnostic codes from the International Classification of Diseases, 10<sup>th</sup> revision, Canadian enhancement. Out of hospital deaths were obtained from Alberta Vital Statistics, which captures all deaths occurring in Alberta. Data from Alberta Vital Statistics was available up to December 30, 2017, which provided at least 18 months of follow-up from the ICU admission date.

*Exposures and Definitions:*

The main study exposure was dominant sedation strategy prior to the first ICDSC assessment. A sedation strategy was defined as a continuous analgo-sedative infusion limited to midazolam, fentanyl, and propofol.

1  
2  
3 Infusions were selected based on a screening survey which demonstrated small populations utilizing alternative  
4 sedation strategies. There were seven possible combinations for the sedation strategy prior to the first ICDSC  
5 assessment: 1) propofol only, 2) fentanyl only, 3) midazolam only, 4) propofol and fentanyl, 5) propofol and  
6 midazolam, 6) fentanyl and midazolam, and 7) all three agents. A high number of patients received more than 1  
7 agent, therefore we classified patients into a dominant sedation strategy, defined as the longest continuous duration  
8 of infusion prior to the first ICDSC assessment, which consists of three categories for the primary analyses. For  
9 example, if fentanyl was provided for the longest duration, fentanyl was considered the dominant sedation strategy.  
10 It is possible the patient could have received propofol or midazolam (or neither) for a duration less than fentanyl. If  
11 the patient received two agents for the same duration, the patient was excluded as no strategy was dominant. As  
12 sensitivity analyses, all seven possible combinations of the sedation strategy used prior to the first ICDSC  
13 assessment were considered.

#### 24 *Outcome Measures:*

25  
26 The primary outcome was categorized as ‘ever/never delirium’ during ICU admission compatible with  
27 previously established delirium outcome measures<sup>7</sup>. All ICU patients with a Richmond Agitation Sedation  
28 Scale(RASS)<sup>24</sup> score  $\geq -3$  were evaluated twice daily using the ICDSC tool<sup>25</sup> and received a protocolized sedation  
29 awakening trial. The ICDSC is a validated delirium assessment tool<sup>25</sup>. Ever delirium patients were those with an  
30 *ICDSC score*  $\geq 4$ ; never delirium were those with an *ICDSC score*  $< 4$ . Total number of days with an *ICDSC score*  $\geq 4$   
31 defined delirium duration. Duration of delirium (days) was examined in secondary analyses.

32  
33 Delirium motor subtypes were identified using the RASS, based on previously published criteria<sup>18</sup>, and  
34 associated positive ICDSC score of  $\geq 4$ . The scale is scored from -5 points (unarousable) to 0 points (calm) to +4  
35 points (combative), where scores between -3 to 0 indicate hypoactive delirium, scores between 1 to 3 indicate  
36 hyperactive delirium, and scores that fluctuate between hypoactive and hyperactive indicate mixed delirium. All  
37 ICDSC scores  $\geq 4$  were linked to the closest RASS score within 4 hours of charting. If there was no RASS score  
38 documented within 4 hours of the ICDSC score, the sub-type was considered “unable to be classified”. If there was a  
39 RASS score within 4 hours of the ICDSC score but the RASS was -5, -4 or +4, the sub-type was considered “unable  
40 to be assessed”. If at least 1 assessment indicated hypoactive delirium and at least 1 assessment indicated  
41 hyperactive delirium the sub-type was considered mixed for that specific patient.

1  
2  
3 Secondary outcomes were mortality in the ICU and hospital, duration of mechanical ventilation, and ICU &  
4 hospital lengths of stay (LOS). Patient mortality was also reported at 30-days and 1-year. Duration of invasive  
5 mechanical ventilation was defined as the time a patient required the use of invasive ventilator.  
6  
7

8  
9 *Statistical Analysis:*

10 Baseline characteristics were summarized using median with interquartile range (IQR) and frequency with  
11 percent and compared between sedation strategies using chi-squared tests and Kruskal-Wallis rank sum tests, as  
12 appropriate. For the primary outcome analysis, logistic regression was used to assess the association between  
13 dominant sedation strategy (propofol vs midazolam vs fentanyl) and risk of developing delirium. The relationship  
14 between dominant sedation strategy and delirium duration was analyzed using negative binomial models. The  
15 relationship between dominant sedation strategy and mortality outcomes were analyzed using logistic regression  
16 models. The relationship between dominant sedation strategy and LOS outcomes (ICU and hospital) were analyzed  
17 using linear regression models with a log-transformation of ICU LOS and hospital LOS. Primary analyses for all  
18 outcomes were based on forming two propensity score-matched cohorts: 1) propofol vs fentanyl and 2) propofol vs  
19 midazolam.  
20  
21  
22  
23  
24  
25  
26  
27  
28  
29

30 The study team considered the following prior to matching including, all measured baseline covariates, all  
31 baseline covariates that are associated with treatment assignment (eg. sedation strategy), all baseline covariates that  
32 affect the outcome (ie. potential confounders) or all covariates that affect both treatment assignment and outcome  
33 (ie. true confounders). Therefore, age, sex, reason for admission, admission APACHE II, the charlson comorbidity  
34 index(0,1,2+), use of vasoactives and renal replacement represented covariates which affected the outcome variables  
35 and therefore were controlled to ensure patient severity and medical issues did not confound the outcome of the  
36 treatment assignment.  
37  
38  
39  
40  
41  
42

43 The cohorts were formed based on 1:1 nearest-neighbor matching without replacement using the logit of  
44 the propensity score and specified caliper width equal to 0.2 of the standard deviation of the logit of the propensity  
45 score<sup>26</sup>. Sensitivity analyses were based on the full cohort with models adjusted a priori for the same patient  
46 characteristics used in the propensity scores. The above analyses were repeated for the 7-category sedation strategy  
47 prior to the first ICDSC assessment. For these analyses, we formed six pairwise propensity score-matched cohorts  
48 similar to the primary analyses, matching with patients on propofol only for each of the other 6 categories of  
49 sedation strategy prior to the first ICDSC assessment. A two-sided p-value < 0.05 was considered statistically  
50  
51  
52  
53  
54  
55  
56  
57  
58  
59  
60

1  
2  
3 significant. Analyses were conducted in R, version 3.5.1.<sup>27</sup> Propensity-score matching was performed using the R  
4 package “MatchIt”, version 3.0.2. Additionally, to control for the competing effects of delirium and death, a  
5 sensitivity analysis of a composite endpoint of delirium or death was calculated.  
6  
7

8  
9 *Results:*

10 There were 2,837 patients in the study cohort (Figure 1), which included 1412 patients (49.8%) receiving a propofol  
11 dominant strategy, 356 patients (12.5%) receiving a midazolam dominant strategy and 1069 patients (37.7%)  
12 receiving a fentanyl dominant strategy. For those receiving propofol dominant sedation, it was common to receive a  
13 single agent of only propofol (62.8%). While among those receiving fentanyl and midazolam dominant sedation  
14 strategies, single agent use was less common with 14.8% and 34.8% only receiving a single agent, respectively.”  
15  
16 Most patients were male (60.7%) with a median age of 57 (IQR 43-68) years and admitted for a medical reason  
17 (50.4%). The median Charlson comorbidity score was 1 (IQR 0-2), admission SOFA score 7 (IQR 4-9) and  
18 admission APACHE II score 19 (IQR 14-25). Patients who received a midazolam dominant sedation strategy were  
19 more likely admitted for medical reasons (72.8%) and had higher Charlson comorbidity scores, admission SOFA  
20 scores and admission APACHE II scores than those receiving propofol and fentanyl dominant sedation strategies.  
21  
22 Patients receiving midazolam dominant strategies were also more likely to receive vasoactive medications (68.8%)  
23 compared to those predominantly receiving propofol (45.3%) and fentanyl dominant sedation strategies (64.5%).  
24  
25 (Table 1).  
26  
27  
28  
29  
30  
31  
32  
33

34  
35 Due to missing patient characteristics for 5 patients (0.2%), propensity scores were calculated for 1,409  
36 patients receiving propofol dominant strategies, 1,067 patients receiving fentanyl dominant sedation strategies and  
37 356 patients receiving midazolam dominant sedation strategies. Of the patients receiving fentanyl dominant sedation  
38 strategies, 201 (18.8%) could not be matched to a patient receiving propofol dominant sedation strategies within the  
39 specified caliper width of 0.2; therefore, this resulted in a matched cohort for propofol and fentanyl of 1,732  
40 patients. Of the patients receiving midazolam dominant sedation strategies, all 356 patients could be matched to a  
41 patient receiving propofol dominant sedation strategies; therefore, this resulted in a matched cohort for patients with  
42 propofol and midazolam dominant sedation strategies of 712 patients. After matching, the baseline characteristics  
43 were balanced (Table 1). The median time from admission to first ICDSC in hours were similar between the  
44 propofol (median time = 17.1 hrs (IQR = 8.5-34.7)), midazolam ((median time = 17.6 hrs (IQR = 8.8-41.2)) and  
45 fentanyl (median time = 16.5 hrs (8.8-35.4)) dominant strategies. Additionally, the median number of ICDSC  
46  
47  
48  
49  
50  
51  
52  
53  
54  
55  
56  
57  
58  
59  
60

1  
2  
3 assessments per ICU day was similar for propofol(1.4 (IQR =1.0-1.8) , fentanyl(1.4 (IQR 1.0-1.8), midazolam(1.3  
4 (IQR 1.0-1.7) dominant sedation strategies.

5  
6  
7 In the propensity score-matched cohorts, there was a statistically significant association between delirium  
8 and midazolam dominant(odds ratio[OR] 1.46 (95% confidence interval 1.06-2.00); p=0.02) as well as fentanyl  
9 dominant (OR 1.22 (95% CI 1.00-1.48); p=0.05) sedation strategies compared to propofol dominant sedation  
10 strategies(Figure 2). To control for the effects of death on delirium rates, a sensitivity analysis of the matched cohort  
11 was performed using a composite outcome of delirium or death. A statistically significant association between the  
12 composite outcome of delirium and death with midazolam dominant(OR 1.53 (95% CI 1.10-2.12; p=0.011) and  
13 fentanyl dominant(OR 1.27 (95% CI 1.04-1.55; p=0.020) strategies was observed, however not for propofol  
14 dominant strategies. Sensitivity analyses based on the 7-category sedation strategy prior to the first ICDSC  
15 assessment showed an increased odds of delirium for those on more than one agent compared to those on propofol  
16 only (Table 2). Among those who ever experienced delirium, the distribution of delirium subtypes was similar  
17 between dominant sedation strategies (Table 3). Based on the propensity score-matched cohorts, a fentanyl  
18 dominant sedation strategy was associated with longer duration of mechanical ventilation, longer ICU and hospital  
19 LOS and more delirium days compared to a propofol dominant sedation strategy, while a midazolam dominant  
20 sedation strategy was associated with a longer duration of mechanical ventilation compared to a propofol dominant  
21 sedation strategy(Figure 3). Sensitivity analyses of the secondary outcomes and cohort characteristics based on the  
22 7-category sedation strategy can be found in the supplementary results(Supplementary Digital Content - Table 1 &  
23 Table 2, respectively). There was a statistically significant association between fentanyl dominant sedation strategy  
24 and ICU(OR=1.50 (1.07-2.12)) and 30-day mortality(OR=1.35 (1.02-1.79)) in propensity score-matched  
25 analyses(Supplementary Digital Content - Table 3). An additional sensitivity analysis of the same propensity score-  
26 matched cohort evaluating sedation strategy dominance for greater than 6 hours can be found in Table 4. This  
27 analysis demonstrated a statistically significant association between fentanyl dominant strategies and a composite of  
28 delirium or death, ICU mortality, hospital mortality, 30 day mortality, 1 year mortality, hospital length of stay and  
29 duration of mechanical ventilation.

### 30 31 32 *Discussion:*

33 Sedative strategies may increase the risk of adverse patient complications such as delirium, or prolonged  
34 mechanical ventilation. We found a midazolam dominant sedation strategy was associated with increased risk of  
35  
36  
37  
38  
39  
40  
41  
42  
43  
44  
45  
46  
47  
48  
49  
50

1  
2  
3 developing delirium, duration of mechanical ventilation, and a composite of delirium and death. Alternatively,  
4 fentanyl was associated with multiple detrimental outcomes including an increased risk of delirium, a composite  
5 outcome of delirium or death, ICU & hospital LOS and duration of mechanical ventilation.  
6  
7

8  
9 The association between benzodiazepine-based sedation strategies and delirium has been suggested in prior  
10 literature<sup>8 17 18</sup>. The importance of these findings should not be understated as patients with delirium suffer  
11 prolonged hospital stays, an increased risk of mortality and long term cognitive impairment<sup>7 8</sup>. Sedation using  
12 multiple agents was also associated with increased delirium risk, duration of mechanical ventilation, ICU LOS and  
13 hospital LOS. Whether these effects are a direct result from the sedation strategy, the resulting delirium or as a result  
14 of other aspects of their critical illness is unclear.  
15  
16  
17  
18  
19

20 We also re-confirmed the association between midazolam dominant sedation strategies and longer  
21 mechanical ventilation but not mortality as reported by Lonardo *et al.*<sup>11</sup>. The mechanism between the association of  
22 benzodiazepines and mortality is unclear, however prolonged mechanical ventilation is a known risk factor for  
23 mortality<sup>28</sup>. A meta-analysis by Ho *et al.* comparing propofol to other sedation strategies did not demonstrate an  
24 impact on mortality; however, it did not specifically look at midazolam compared to other benzodiazepines<sup>29</sup>. The  
25 heterogeneity in mortality outcomes may be attributable to variation in sedation depth, as early deep sedation is an  
26 independent predictor of delayed time to extubation and long term mortality<sup>12</sup>. Therefore, not only agent choice but  
27 also sedation depth might contribute to the variation in mortality risk observed with benzodiazepines.  
28  
29  
30  
31  
32  
33  
34

35 Sedation with midazolam and fentanyl is often selected for patients with significant hemodynamic  
36 instability to avoid the negative inotropic and vasodilatory effects of propofol. In our study, those receiving  
37 midazolam dominant sedation strategies demonstrated significantly higher SOFA scores, APACHE II scores on  
38 admission and were more likely to receive vasoactive medications and continuous renal replacement. All of these  
39 may impact mortality when unaccounted for and may explain the heterogeneity observed in the literature<sup>30</sup>. For  
40 example, Lonardo *et al.* did not control for the presence of renal replacement which has been associated with a high  
41 rate of mortality in critically ill patients<sup>11 31</sup>. Our use of detailed clinical data for risk adjustment may help explain  
42 the differences in mortality compared to prior reports.  
43  
44  
45  
46  
47  
48  
49

50  
51 A fentanyl dominant sedation strategy was significantly associated with an increased risk of delirium, a  
52 composite of delirium or death, ICU LOS, hospital LOS and duration of mechanical ventilation. Prior literature  
53 shows associations with delayed extubation when given in the first 48 hours, which supports our findings<sup>12</sup>. What is  
54  
55  
56  
57  
58  
59

1  
2  
3 unclear is whether our result is a direct effect of fentanyl, an indirect effect from resulting complications of fentanyl  
4 use, for example a pulmonary embolism or pneumonia, or simply an observed association driven by an unidentified  
5 confounder. Fentanyl dominant strategies were associated with increased risk of ICU mortality, 30-day mortality,  
6 and at hospital discharge but not 1 year. It is difficult to know what to make of these observations. The relationship  
7 between fentanyl use and ICU mortality has been incompletely explored in the literature. The mortality risk  
8 associated with fentanyl use may be attributable to prolongations in mechanical ventilation<sup>28</sup>. In our data, the effect  
9 of mortality appeared strongest in those receiving only fentanyl and was less robust when used in combination. It is  
10 possible those patients who received fentanyl monotherapy were more critically ill. The baseline characteristics of  
11 the fentanyl only subgroup revealed these patients that were older, had a higher vasopressor and CRRT use  
12 compared to a propofol only but not a midazolam only strategy (Table S3). However, when fentanyl was the  
13 dominant strategy for greater than 6 hours compared to the other two strategies, the association between fentanyl  
14 and negative patient centred outcomes was more consistent. This may suggest the detrimental association between  
15 fentanyl dominant strategies and patient centred outcomes observed is time dependent. Another possibility could be  
16 the immunomodulatory effects of narcotics. The mu-opioid receptor is expressed on macrophages and T-  
17 lymphocytes, and chronic administration may increase the risk of bacterial infection<sup>32-34</sup>. Therefore, large doses of  
18 fentanyl may contribute to further immune dysregulation thereby placing critically ill patients at risk of infection. A  
19 final possibility is the use of fentanyl in the provision of palliative symptom control, therefore the mortality  
20 association is a marker of this practice. Further study is required to better delineate the true nature of the association  
21 between fentanyl and deleterious patient outcomes in the ICU.

22  
23  
24  
25  
26  
27  
28  
29  
30  
31  
32  
33  
34  
35  
36  
37  
38  
39  
40 Our studies strength is our large cohort size supported by granular patient detail extracted from a  
41 prospectively collected, clinical database representing multiple ICUs and the covariates were rigorously controlled  
42 using a propensity matched model<sup>22</sup>. The multicenter study design provides a pragmatic view of how sedation  
43 strategies are utilized in clinical practice. Limitations of our study include the possibility of confounding bias due to  
44 unmeasured impactful covariates or confounding by indication. Patients receiving midazolam dominant strategies  
45 were clearly more critically ill compared to those receiving propofol dominant strategies manifest by higher  
46 APACHE II scores, greater vasopressor requirements, and higher rates of renal replacement. To compensate, we  
47 conducted propensity score-matched analyses adjusted for known covariates. Additionally, fentanyl and midazolam  
48 are often used concurrently and teasing apart the isolated effects of each medication may be challenging. Adjustment  
49  
50  
51  
52  
53  
54  
55  
56  
57  
58  
59  
60



1  
2  
3 with our statistical model should minimize this effect, however, it is possible that unrecognized confounders which  
4 are not accounted for in the model could introduce unrecognized bias. Randomized controlled trials would better  
5 assess this limitation.  
6  
7

8  
9 Moreover, we focused primarily on the presence or absence of continuous infusions and did not quantify  
10 the impact of independent drug boluses. However, this effect would lessen the association with our primary outcome  
11 suggesting our observed associations are conservative. Another limitation is the use of drug duration as a surrogate  
12 for the impact of the sedation strategy rather than in vivo plasma concentrations. Patient factors may impact  
13 midazolam metabolism due to differences in age, hepatic or renal dysfunction or co-administration of medications  
14 with similar metabolic pathways<sup>35-37</sup>. Finally, the definition of dominant sedation strategy based on longest duration  
15 of infusion prior to first ICDSC may be considered arbitrary. It is also possible that the current definition classifies  
16 some patients as having one dominant sedation strategy when multiple infusions were discontinued in a noticeably  
17 short time frame. However, defining sedation in the setting of multiple agents has been incompletely explored in the  
18 literature, therefore novel definitions are required. Our data closely reflects multiple findings previously reported  
19 with both midazolam and fentanyl sedation. Furthermore, when restricted to patients who received a dominant  
20 sedation strategy for greater than 6 hours, the association between fentanyl dominant strategies and negative patient  
21 outcomes was more apparent. This reduces the possibility our findings are pure chance. When thresholds for longer  
22 durations of sedation dominance were used, the effects became inconsistent, however may be secondary to the  
23 effects of statistical analysis on progressively smaller populations.  
24  
25  
26  
27  
28  
29  
30  
31  
32  
33  
34  
35  
36

### 37 *Conclusion:*

38  
39 This multi-center, propensity score-matched cohort study demonstrates a novel association between fentanyl  
40 dominant sedation strategies and negative outcomes in the ICU. Fentanyl dominant sedation strategies were  
41 associated with an increased risk of delirium, a composite of delirium or death, duration of ventilation, ICU LOS  
42 and hospital LOS. We also confirmed previous reports including an increased risk of delirium and duration of  
43 mechanical ventilation with midazolam dominant sedation strategies. This study highlights the need for additional  
44 research to further evaluate potentially negative effects of fentanyl and midazolam based sedation strategies.  
45  
46  
47  
48  
49  
50  
51  
52

### 53 Sources of Funding:

54  
55 This project was unfunded.  
56  
57  
58  
59  
60

1  
2  
3  
4  
5 Disclosures:

6  
7 The authors have no conflicts of interest.  
8  
9

10  
11 Acknowledgements:

12 The authors would like to thank the Hotchkiss Brain institute, the O'Brien Institute for Public Health, and the  
13 University of Calgary Departments of Critical Care, Community Health Sciences and Psychiatry for their on-going  
14 support. Moreover, we would like to thank the reviewers and editorial team for their hard work and consideration.  
15  
16  
17

18  
19  
20 Contributorship Statement: Dr CC was involved in the concept, study protocol, study oversight, statistical modeling,  
21 and all aspects of writing the manuscript. Drs AS & CHL were involved in the statistical modeling and contributed  
22 to the methods section of the manuscript. Drs KF, DN, TS, PC were involved in developing the concept, study  
23 protocol, study oversight and contributed to the discussion of the manuscript.  
24  
25  
26  
27

28  
29  
30 Data Sharing Statement: Raw data were generated at the University of Calgary. Derived data supporting the findings  
31 of this study are available from the corresponding author CC on request.  
32  
33  
34

35  
36 References:

- 37  
38 1. Association AP. Diagnostic and Statistical Manual of Mental Disorders(DSM-5). Arlington, VA:  
39 American Psychiatric Association 2013.  
40 2. Ely EW, Inouye SK, Bernard GR, et al. Delirium in mechanically ventilated patients: validity  
41 and reliability of the confusion assessment method for the intensive care unit (CAM-  
42 ICU). *JAMA* 2001;286(21):2703-10.  
43 3. Dubois MJ, Bergeron N, Dumont M, et al. Delirium in an intensive care unit: a study of risk  
44 factors. *Intensive Care Med* 2001;27(8):1297-304.  
45 4. Pandharipande P, Cotton BA, Shintani A, et al. Prevalence and risk factors for development of  
46 delirium in surgical and trauma intensive care unit patients. *J Trauma* 2008;65(1):34-41.  
47 doi: 10.1097/TA.0b013e31814b2c4d  
48 5. Girard TD, Kress JP, Fuchs BD, et al. Efficacy and safety of a paired sedation and ventilator  
49 weaning protocol for mechanically ventilated patients in intensive care (Awakening and  
50 Breathing Controlled trial): a randomised controlled trial. *Lancet* 2008;371(9607):126-  
51 34. doi: 10.1016/S0140-6736(08)60105-1  
52  
53  
54  
55  
56  
57  
58  
59  
60

- 1  
2  
3 6. Zaal IJ, Devlin JW, Peelen LM, et al. A systematic review of risk factors for delirium in the ICU.  
4 *Crit Care Med* 2015;43(1):40-7. doi: 10.1097/CCM.0000000000000625
- 5  
6 7. Thomason JW, Shintani A, Peterson JF, et al. Intensive care unit delirium is an independent  
7 predictor of longer hospital stay: a prospective analysis of 261 non-ventilated patients.  
8 *Crit Care* 2005;9(4):R375-81. doi: 10.1186/cc3729
- 9  
10 8. Ely E, Shintani A, Truman B, et al. Delirium as a predictor of mortality in mechanically  
11 ventilated patients in the intensive care unit. *JAMA* 2004;291(14):1753-62.
- 12  
13 9. Needham DM, Bronskill SE, Calinawan JR, et al. Projected incidence of mechanical ventilation  
14 in Ontario to 2026: Preparing for the aging baby boomers. *Crit Care Med*  
15 2005;33(3):574-9.
- 16  
17 10. Jacobs P, Noseworthy TW. National estimates of intensive care utilization and costs: Canada  
18 and the United States. *Crit Care Med* 1990;18(11):1282-6.
- 19  
20 11. Lonardo NW, Mone MC, Nirula R, et al. Propofol is associated with favorable outcomes  
21 compared with benzodiazepines in ventilated intensive care unit patients. *Am J Respir*  
22 *Crit Care Med* 2014;189(11):1383-94. doi: 10.1164/rccm.201312-2291OC
- 23  
24 12. Shehabi Y, Bellomo R, Reade MC, et al. Early intensive care sedation predicts long-term  
25 mortality in ventilated critically ill patients. *Am J Respir Crit Care Med* 2012;186(8):724-  
26 31. doi: 10.1164/rccm.201203-0522OC
- 27  
28 13. Riker RR, Shehabi Y, Bokesch PM, et al. Dexmedetomidine vs midazolam for sedation of  
29 critically ill patients: a randomized trial. *JAMA* 2009;301(5):489-99. doi:  
30 10.1001/jama.2009.56
- 31  
32 14. R B-v, Mar Sanchez-Soria M, Morales-Garcia C, et al. Prolonged sedation of critically ill  
33 patients with midazolam or propofol: impact on weaning and costs. *Crit Care Med*  
34 1997;25(1):33-40.
- 35  
36 15. Aitkenhead AR, Pepperman ML, Willatts SM, et al. Comparison of propofol and midazolam  
37 for sedation in critically ill patients. *Lancet* 1989;2(8665):704-9.
- 38  
39 16. Chamorro C, de Latorre FJ, Montero A, et al. Comparative study of propofol versus  
40 midazolam in the sedation of critically ill patients: results of a prospective, randomized,  
41 multicenter trial. *Crit Care Med* 1996;24(6):932-9.
- 42  
43 17. Barr J, Fraser GL, Puntillo K, et al. Clinical practice guidelines for the management of pain,  
44 agitation, and delirium in adult patients in the intensive care unit. *Crit Care Med*  
45 2013;41(1):263-306. doi: 10.1097/CCM.0b013e3182783b72
- 46  
47 18. Pandhairpande P, Shintani A, Peterson J, et al. Lorazepam is an independent risk factor for  
48 transitioning to delirium in intensive care unit patients. *Anesthesiology* 2006;104(1):21-  
49 26.
- 50  
51 19. Cammarano WB, Pittet JF, Weitz S, et al. Acute withdrawal syndrome related to the  
52 administration of analgesic and sedative medications in adult intensive care unit  
53 patients. *Crit Care Med* 1998;26(4):676-84.
- 54  
55 20. von Elm E, Altman DG, Egger M, et al. The Strengthening the Reporting of Observational  
56 Studies in Epidemiology (STROBE) statement: guidelines for reporting observational  
57 studies. *The Lancet* 2007;370(9596):1453-57. doi: 10.1016/s0140-6736(07)61602-x
- 58  
59 21. Chiasson TC, Manns BJ, Stelfox HT. An economic evaluation of venous thromboembolism  
60 prophylaxis strategies in critically ill trauma patients at risk of bleeding. *PLoS Med*  
2009;6(6):e1000098. doi: 10.1371/journal.pmed.1000098

- 1
  - 2
  - 3
  - 4
  - 5
  - 6
  - 7
  - 8
  - 9
  - 10
  - 11
  - 12
  - 13
  - 14
  - 15
  - 16
  - 17
  - 18
  - 19
  - 20
  - 21
  - 22
  - 23
  - 24
  - 25
  - 26
  - 27
  - 28
  - 29
  - 30
  - 31
  - 32
  - 33
  - 34
  - 35
  - 36
  - 37
  - 38
  - 39
  - 40
  - 41
  - 42
  - 43
  - 44
  - 45
  - 46
  - 47
  - 48
  - 49
  - 50
  - 51
  - 52
  - 53
  - 54
  - 55
  - 56
  - 57
  - 58
  - 59
  - 60
22. Brundin-Mather R, Soo A, Zuege DJ, et al. Secondary EMR data for quality improvement and research: A comparison of manual and electronic data collection from an integrated critical care electronic medical record system. *J Crit Care* 2018;47:295-301. doi: 10.1016/j.jcrc.2018.07.021
23. Stelfox HT, Soo A, Niven DJ, et al. Assessment of the Safety of Discharging Select Patients Directly Home From the Intensive Care Unit: A Multicenter Population-Based Cohort Study. *JAMA Intern Med* 2018;178(10):1390-99. doi: 10.1001/jamainternmed.2018.3675
24. Sessler CN, Gosnell MS, Grap MJ, et al. The Richmond Agitation-Sedation Scale: validity and reliability in adult intensive care unit patients. *Am J Respir Crit Care Med* 2002;166(10):1338-44. doi: 10.1164/rccm.2107138
25. Bergeron N, Dubois MJ, Dumont M, et al. Intensive Care Delirium Screening Checklist: evaluation of a new screening tool. *Intensive Care Med* 2001;27(5):859-64.
26. Austin PC. Optimal caliper widths for propensity-score matching when estimating differences in means and differences in proportions in observational studies. *Pharm Stat* 2011;10(2):150-61. doi: 10.1002/pst.433
27. Team RC. R: A language and environment for statistical computing. . 2018
28. Feng Y, Amoateng-Adjepong Y, Kaufman D, et al. Age, duration of mechanical ventilation, and outcomes of patients who are critically ill. *Chest* 2009;136(3):759-64. doi: 10.1378/chest.09-0515
29. Ho KM, Ng JY. The use of propofol for medium and long-term sedation in critically ill adult patients: a meta-analysis. *Intensive Care Med* 2008;34(11):1969-79. doi: 10.1007/s00134-008-1186-5
30. Soo A, Zuege DJ, Fick GH, et al. Describing organ dysfunction in the intensive care unit: a cohort study of 20,000 patients. *Crit Care* 2019;23(1):186. doi: 10.1186/s13054-019-2459-9
31. Uchino S, Kellum JA, Bellomo R, et al. Acute renal failure in critically ill patients: a multinational, multicenter study. *JAMA* 2005;294(7):813-8. doi: 10.1001/jama.294.7.813
32. Risdahl JM, Khanna KV, Peterson PK, et al. Opiates and infection. *J Neuroimmunol* 1998;83(1-2):4-18.
33. Roy S, Loh HH. Effects of opioids on the immune system. *Neurochem Res* 1996;21(11):1375-86.
34. Roy S, Wang J, Kelschenbach J, et al. Modulation of immune function by morphine: implications for susceptibility to infection. *J Neuroimmune Pharmacol* 2006;1(1):77-89. doi: 10.1007/s11481-005-9009-8
35. Barr J, Zomorodi K, Bertaccini EJ, et al. A double-blind, randomized comparison of i.v. lorazepam versus midazolam for sedation of ICU patients via a pharmacologic model. *Anesthesiology* 2001;95(2):286-98.
36. Swart EL, Zuideveld KP, de Jongh J, et al. Comparative population pharmacokinetics of lorazepam and midazolam during long-term continuous infusion in critically ill patients. *Br J Clin Pharmacol* 2004;57(2):135-45.
37. Oldenhof H, de Jong M, Steenhoek A, et al. Clinical pharmacokinetics of midazolam in intensive care patients, a wide interpatient variability? *Clin Pharmacol Ther* 1988;43(3):263-9.

Tables:

**Table 1: Baseline Characteristics**

| Characteristic                              | Overall cohort       |                      |                      | Dominant sedation strategy matched cohorts |                      |                                         |                     |
|---------------------------------------------|----------------------|----------------------|----------------------|--------------------------------------------|----------------------|-----------------------------------------|---------------------|
|                                             | Propofol<br>(n=1412) | Fentanyl<br>(n=1069) | Midazolam<br>(n=356) | Propofol vs. Midazolam<br>matched cohort   |                      | Propofol vs. Fentanyl<br>matched cohort |                     |
|                                             |                      |                      |                      | Propofol<br>(n=356)                        | Midazolam<br>(n=356) | Propofol<br>(n=866)                     | Fentanyl<br>(n=866) |
| Age, median (IQR)                           | 56 (42-67)           | 59 (44-69)           | 59 (46-71)           | 58 (48-69)                                 | 59 (46-71)           | 57 (46-68)                              | 57 (42-69)          |
| Male, n (%)                                 | 843<br>(59.7)        | 656 (61.4)           | 223 (62.6)           | 227<br>(63.8)                              | 223 (62.6)           | 533<br>(61.5)                           | 520<br>(60.0)       |
| Admission reason, n (%)                     |                      |                      |                      |                                            |                      |                                         |                     |
| Medical                                     | 791<br>(56.0)        | 379 (35.5)           | 259 (72.8)           | 253<br>(71.1)                              | 259 (72.8)           | 426<br>(49.2)                           | 379<br>(43.8)       |
| Surgical                                    | 265<br>(18.8)        | 405 (37.9)           | 69 (19.4)            | 74 (20.8)                                  | 69 (19.4)            | 256<br>(29.6)                           | 248<br>(28.6)       |
| Neurological                                | 245<br>(17.4)        | 73 (6.8)             | 19 (5.3)             | 18 (5.1)                                   | 19 (5.3)             | 76 (8.8)                                | 73 (8.4)            |
| Trauma                                      | 109 (7.7)            | 211 (19.7)           | 9 (2.5)              | 11 (3.1)                                   | 9 (2.5)              | 108<br>(12.5)                           | 166<br>(19.2)       |
| Location admitted from                      |                      |                      |                      |                                            |                      |                                         |                     |
| Emergency Room                              | 833<br>(59.0%)       | 413<br>(38.6%)       | 190<br>(53.4%)       | 202<br>(56.7)                              | 190 (53.4)           | 441<br>(50.9)                           | 369<br>(42.6)       |
| Operating Room/Recovery                     | 278<br>(19.7%)       | 399<br>(37.3%)       | 59 (16.6%)           | 63 (17.7)                                  | 59 (16.6)            | 232<br>(26.8)                           | 271<br>(31.3)       |
| Hospital Ward                               | 254<br>(18.0%)       | 209<br>(19.6%)       | 91 (25.6%)           | 85 (23.9)                                  | 91 (25.6)            | 165<br>(19.1)                           | 180<br>(20.8)       |
| Another Hospital                            | 26<br>(1.8%)         | 24 (2.2%)            | 7 (2.0%)             | 4 (1.1)                                    | 7 (2.0)              | 17 (2.0)                                | 23 (2.7)            |
| Other                                       | 21<br>(1.5%)         | 24 (2.2%)            | 9 (2.5%)             | 2 (0.6)                                    | 9 (2.5)              | 11 (1.3)                                | 23 (2.7)            |
| Charlson score, n (%)                       |                      |                      |                      |                                            |                      |                                         |                     |
| 0                                           | 582<br>(41.2%)       | 422<br>(39.5%)       | 121<br>(34.0%)       | 127<br>(35.7)                              | 121 (34.0)           | 322<br>(37.2)                           | 336<br>(38.8)       |
| 1                                           | 317<br>(22.5%)       | 239<br>(22.4%)       | 70 (19.7%)           | 61 (17.1)                                  | 70 (19.7)            | 201<br>(23.2)                           | 207<br>(23.9)       |
| 2+                                          | 513<br>(36.3%)       | 408<br>(38.2%)       | 165<br>(46.3%)       | 168<br>(47.2)                              | 165 (46.3)           | 343<br>(39.6)                           | 323<br>(37.3)       |
| Charlson score, median (IQR)                | 1 (0-2)              | 1 (0-2)              | 1 (0-3)              | 1 (0-3)                                    | 1 (0-3)              | 1 (0-3)                                 | 1 (0-2)             |
| Admission SOFA score, median (IQR)          | 6 (4-8)              | 7 (5-10)             | 8 (6-11)             | 8 (5-10)                                   | 8 (6-11)             | 7 (4-9)                                 | 7 (4-10)            |
| Admission APACHE II score, median (IQR)     | 18 (13-24)           | 19 (14-25)           | 23 (16-28)           | 21 (16-27)                                 | 23 (16-28)           | 19 (14-24)                              | 19 (13-26)          |
| Vasoactive medications, n (%)               | 639<br>(45.3%)       | 690<br>(64.5%)       | 245<br>(68.8%)       | 241<br>(67.7)                              | 245 (68.8)           | 526<br>(60.7)                           | 488<br>(56.4)       |
| Continuous renal replacement therapy, n (%) | 59<br>(4.2%)         | 78 (7.3%)            | 33 (9.3%)            | 28 (7.9)                                   | 33 (9.3)             | 52 (6.0)                                | 73 (8.4)            |

**Table 2: Sensitivity Analyses examining the relationship between delirium and individual sedation agents prior to first ICDSC assessment**

| Sedation agent prior to first ICDSC assessment | Overall Cohort     |                      |                                   | Matched cohorts              |                                                                 |                      |                                                                    |
|------------------------------------------------|--------------------|----------------------|-----------------------------------|------------------------------|-----------------------------------------------------------------|----------------------|--------------------------------------------------------------------|
|                                                | Number of patients | Ever Delirium, n (%) | Adjusted OR (95% CI) <sup>1</sup> | Number of patients per group | Ever Delirium for propofol patients from matched cohorts, n (%) | Ever Delirium, n (%) | Propensity score-matched OR for Ever delirium(95% CI) <sup>2</sup> |
| Propofol                                       | 887                | 509 (57.4)           | 1.00 (reference group)            | N/A <sup>3</sup>             | N/A <sup>3</sup>                                                | N/A <sup>3</sup>     | 1.00 (reference group)                                             |
| Fentanyl                                       | 158                | 91 (57.6)            | 1.04 (0.71-1.52)                  | 152                          | 74 (48.7)                                                       | 87 (57.2)            | 1.41 (0.90-2.22)                                                   |
| Midazolam                                      | 124                | 77 (62.1)            | 1.11 (0.73-1.69)                  | 122                          | 69 (56.6)                                                       | 75 (61.5)            | 1.23 (0.74-2.05)                                                   |
| Propofol + Fentanyl                            | 854                | 543 (63.6)           | 1.32 (1.06-1.65)                  | 565                          | 323 (57.2)                                                      | 347 (61.4)           | 1.19 (0.94-1.51)                                                   |
| Propofol + Midazolam                           | 224                | 163 (72.8)           | 1.72 (1.23-2.43)                  | 223                          | 143 (64.1)                                                      | 162 (72.6)           | 1.49 (1.00-2.23)                                                   |
| Fentanyl + Midazolam                           | 222                | 160 (72.1)           | 1.72 (1.22-2.46)                  | 214                          | 119 (55.6)                                                      | 153 (71.5)           | 2.00 (1.34-3.00)                                                   |
| All 3                                          | 368                | 269 (73.1)           | 1.84 (1.38-2.47)                  | 335                          | 199 (59.4)                                                      | 241 (71.9)           | 1.75 (1.27-2.42)                                                   |

**Table 3: Delirium subtype by dominant sedation strategy prior to first ICDSC assessment among patients experiencing delirium for the propensity score-matched cohorts**

| Delirium Subtype                    | Dominant sedation strategy                                          |                  |                                                                      |                   |
|-------------------------------------|---------------------------------------------------------------------|------------------|----------------------------------------------------------------------|-------------------|
|                                     | Propofol vs. Fentanyl matched cohort patients experiencing delirium |                  | Propofol vs. Midazolam matched cohort patients experiencing delirium |                   |
|                                     | Propofol (n=529)                                                    | Fentanyl (n=569) | Propofol (n=228)                                                     | Midazolam (n=257) |
| Hyperactive only, n (%)             | 47 (8.9)                                                            | 40 (7.0)         | 15 (6.6)                                                             | 25 (9.7)          |
| Hypoactive only, n (%)              | 210 (39.7)                                                          | 228 (40.1)       | 104 (45.6)                                                           | 106 (41.2)        |
| Mixed, n (%)                        | 254 (48.0)                                                          | 289 (50.8)       | 103 (45.2)                                                           | 123 (47.9)        |
| Unable to assess or classify, n (%) | 18 (3.4)                                                            | 12 (2.1)         | 6 (2.6)                                                              | 3 (1.2)           |

**Table 4: Sensitivity analyses based on those on a single sedation strategy or those whose sedation strategy was dominant for ≥6 hours over the other 2 strategies.**

| Outcome               | Dominant Sedation Strategy | Propensity score-matched odds ratio, mean ratio or rate ratio (95% CI) <sup>1</sup> |
|-----------------------|----------------------------|-------------------------------------------------------------------------------------|
| Delirium ever         | Propofol                   | 1.00 (reference group)                                                              |
|                       | Fentanyl(n=476)            | 1.29 (0.99-1.69)                                                                    |
|                       | Midazolam(n=231)           | <b>1.64 (1.12-2.41)</b>                                                             |
| Delirium or ICU death | Propofol                   | 1.00 (reference group)                                                              |
|                       | Fentanyl(n=476)            | <b>1.38 (1.05-1.81)</b>                                                             |
|                       | Midazolam(n=231)           | <b>1.75 (1.18-2.60)</b>                                                             |
| ICU Mortality         | Propofol                   | 1.00 (reference group)                                                              |
|                       | Fentanyl(n=476)            | <b>1.82 (1.18-2.84)</b>                                                             |

|                                                       |                  |                         |
|-------------------------------------------------------|------------------|-------------------------|
|                                                       | Midazolam(n=231) | 1.31 (0.73-2.39)        |
| Hospital Mortality                                    | Propofol         | 1.00 (reference group)  |
|                                                       | Fentanyl(n=476)  | <b>1.69 (1.19-2.42)</b> |
|                                                       | Midazolam(n=231) | 1.50 (0.92-2.49)        |
| Died within 30 days of ICU admission                  | Propofol         | 1.00 (reference group)  |
|                                                       | Fentanyl(n=476)  | <b>1.84 (1.27-2.68)</b> |
|                                                       | Midazolam(n=231) | 1.14 (0.69-1.89)        |
| Died within 1 year of ICU admission                   | Propofol         | 1.00 (reference group)  |
|                                                       | Fentanyl(n=476)  | <b>1.38 (1.02-1.86)</b> |
|                                                       | Midazolam(n=231) | 1.16 (0.77-1.76)        |
| Died within 1.5 years of ICU admission                | Propofol         | 1.00 (reference group)  |
|                                                       | Fentanyl(n=476)  | 1.25 (0.94-1.66)        |
|                                                       | Midazolam(n=231) | 1.25 (0.84-1.85)        |
| ICU length of stay, mean ratio (95% CI)               | Propofol         | 1.00 (reference group)  |
|                                                       | Fentanyl(n=476)  | <b>1.23 (1.09-1.39)</b> |
|                                                       | Midazolam(n=231) | 1.01 (0.86-1.20)        |
| Hospital length of stay, mean ratio (95% CI)          | Propofol         | 1.00 (reference group)  |
|                                                       | Fentanyl(n=476)  | <b>1.31 (1.13-1.51)</b> |
|                                                       | Midazolam(n=231) | 1.01 (0.83-1.22)        |
| Duration of invasive ventilation, mean ratio (95% CI) | Propofol         | 1.00 (reference group)  |
|                                                       | Fentanyl(n=476)  | <b>1.35 (1.14-1.59)</b> |
|                                                       | Midazolam(n=231) | 1.17 (0.94-1.46)        |
| Number of delirium days, rate ratio (95% CI)          | Propofol         | 1.00 (reference group)  |
|                                                       | Fentanyl(n=476)  | 1.19 (0.99-1.43)        |
|                                                       | Midazolam(n=231) | 1.11 (0.85-1.44)        |

<sup>1</sup>Data presented as odds ratios unless otherwise indicated.

Figure Legends:

**Figure 1: Cohort diagram**

**Figure 2: Propensity score-matched odds ratios of delirium by dominant sedation strategy prior to first ICDS assessment**

**Figure 3: Forest plot of propensity score-matched mean or rate ratios of secondary outcomes and sedation strategy**

**Figure 1: Cohort diagram**



**Figure 2: Propensity score-matched odds ratios of delirium by dominant sedation strategy prior to first ICDSC assessment**



Peer review only

**Figure 3: Forest plot of propensity score-matched mean or rate ratios of secondary outcomes and sedation strategy**



**Table S1: Secondary outcomes by sedation strategy prior to first ICDS assessment**

| <b>Propensity score-matched mean ratio or rate ratio (95% CI)<sup>1</sup></b> | <b>ICU LOS</b>          | <b>Hospital LOS</b>     | <b>Duration of invasive ventilation</b> | <b>Number of delirium days</b> |
|-------------------------------------------------------------------------------|-------------------------|-------------------------|-----------------------------------------|--------------------------------|
| Sedation prior to first ICDS assessment                                       |                         |                         |                                         |                                |
| Propofol                                                                      | 1.00 (reference group)  | 1.00 (reference group)  | 1.00 (reference group)                  | 1.00 (reference group)         |
| Fentanyl                                                                      | 1.06 (0.85-1.33)        | 1.25 (0.97-1.61)        | 1.00 (0.74-1.35)                        | 1.03 (0.69-1.55)               |
| Midazolam                                                                     | 0.83 (0.65-1.06)        | 0.98 (0.75-1.28)        | 1.00 (0.73-1.38)                        | 0.88 (0.59-1.31)               |
| Propofol + Fentanyl                                                           | <b>1.17 (1.05-1.30)</b> | <b>1.20 (1.05-1.38)</b> | <b>1.37 (1.18-1.58)</b>                 | 1.08 (0.90-1.31)               |
| Propofol + Midazolam                                                          | 1.16 (0.99-1.36)        | 0.86 (0.68-1.08)        | <b>1.59 (1.28-1.99)</b>                 | 1.11 (0.87-1.41)               |
| Fentanyl + Midazolam                                                          | <b>1.40 (1.17-1.67)</b> | <b>1.27 (1.02-1.57)</b> | <b>1.95 (1.54-2.46)</b>                 | 1.28 (0.97-1.69)               |
| All 3                                                                         | <b>1.73 (1.52-1.98)</b> | <b>1.39 (1.18-1.63)</b> | <b>2.47 (2.06-2.97)</b>                 | <b>1.35 (1.10-1.67)</b>        |

<sup>1</sup>Propensity score based on age, sex, admission class, Charlson comorbidity category (0, 1, 2+), admission APACHE II score, vasoactive medications, continuous renal replacement therapy. 1:1 nearest-neighbor matching without replacement using the logit of the propensity score and specified caliper width equal to 0.2 of the standard deviation of the logit of the propensity score

**Table S2: Propensity score matched models of the relationship between mortality outcomes and dominant sedation strategy prior to first ICDSC assessment**

| <b>Outcome</b>                                | <b>Dominant Sedation Strategy</b> | <b>Mortality, n (%)</b> | <b>Propensity score-matched OR (95% CI)<sup>2</sup></b> |
|-----------------------------------------------|-----------------------------------|-------------------------|---------------------------------------------------------|
| <b>ICU Mortality</b>                          | Propofol                          | 94 (6.7)                | 1.00 (reference)                                        |
|                                               | Fentanyl                          | 104 (9.7)               | <b>1.50 (1.07-2.12)</b>                                 |
|                                               | Midazolam                         | 39 (11.0)               | 1.20 (0.74-1.97)                                        |
| <b>Hospital Mortality</b>                     | Propofol                          | 157 (11.1)              | 1.00 (reference)                                        |
|                                               | Fentanyl                          | 166 (15.5)              | 1.27 (0.97-1.67)                                        |
|                                               | Midazolam                         | 59 (16.6)               | 1.14 (0.76-1.70)                                        |
| <b>Died within 30 days of ICU admission</b>   | Propofol                          | 148 (10.5)              | 1.00 (reference)                                        |
|                                               | Fentanyl                          | 148 (13.8)              | <b>1.35 (1.02-1.79)</b>                                 |
|                                               | Midazolam                         | 50 (14.0)               | 1.02 (0.67-1.57)                                        |
| <b>Died within 1 year of ICU admission</b>    | Propofol                          | 268 (19.0)              | 1.00 (reference)                                        |
|                                               | Fentanyl                          | 248 (23.2)              | 1.13 (0.90-1.43)                                        |
|                                               | Midazolam                         | 91 (25.6)               | 1.01 (0.72-1.42)                                        |
| <b>Died within 1.5 years of ICU admission</b> | Propofol                          | 308 (21.8)              | 1.00 (reference)                                        |
|                                               | Fentanyl                          | 276 (25.8)              | 1.12 (0.90-1.40)                                        |
|                                               | Midazolam                         | 109 (30.6)              | 1.01 (0.74-1.39)                                        |

Supplementary Table 3: Table of baseline characteristics for sensitivity analyses

|                         | Propofol<br>(n=887) | Fentanyl<br>(n=158) | Midazolam<br>(n=124) | Propofol<br>+<br>Fentanyl<br>(n=854) | Propofol +<br>Midazolam<br>(n=224) | Fentanyl +<br>Midazolam<br>(n=222) | All 3<br>(n=368) |
|-------------------------|---------------------|---------------------|----------------------|--------------------------------------|------------------------------------|------------------------------------|------------------|
| <b>Characteristic</b>   |                     |                     |                      |                                      |                                    |                                    |                  |
| Age, median (IQR)       | 58 (46-69)          | 64 (54-74)          | 66 (54-74)           | 55 (40-67)                           | 51 (35-60)                         | 61 (51-71)                         | 52 (40-65)       |
| Male, n (%)             | 506 (57.0)          | 79 (50.0)           | 79 (63.7)            | 532 (62.3)                           | 145 (64.7)                         | 133 (59.9)                         | 248 (67.4)       |
| Admission reason, n (%) |                     |                     |                      |                                      |                                    |                                    |                  |
| Medical                 | 518 (58.5)          | 59 (37.3)           | 87 (70.2)            | 236 (27.7)                           | 176 (78.6)                         | 121 (54.5)                         | 232 (63.0)       |
| Surgical                | 163 (18.4)          | 72 (45.6)           | 30 (24.2)            | 299 (35.1)                           | 7 (3.1)                            | 81 (36.5)                          | 87 (23.6)        |
| Neurological            | 169 (19.1)          | 10 (6.3)            | 6 (4.8)              | 102 (12.0)                           | 37 (16.5)                          | 3 (1.4)                            | 10 (2.7)         |
| Trauma                  | 35 (4.0)            | 17 (10.8)           | 1 (0.8)              | 216 (25.3)                           | 4 (1.8)                            | 17 (7.7)                           | 39 (10.6)        |
| Location admitted from  |                     |                     |                      |                                      |                                    |                                    |                  |
| Emergency Room          | 520 (58.6)          | 53 (33.5)           | 49 (39.5)            | 367 (43.0)                           | 168 (75.0)                         | 93 (41.9)                          | 186 (50.5)       |
| Operating Room/Recovery | 170 (19.2)          | 62 (39.2)           | 27 (21.8)            | 320 (37.5)                           | 6 (2.7)                            | 65 (29.3)                          | 86 (23.4)        |
| Hospital Ward           | 166 (18.7)          | 39 (24.7)           | 43 (34.7)            | 140 (16.4)                           | 40 (17.9)                          | 49 (22.1)                          | 77 (20.9)        |
| Another Hospital        | 17 (1.9)            | 3 (1.9)             | 2 (1.6)              | 13 (1.5)                             | 7 (3.1)                            | 7 (3.2)                            | 8 (2.2)          |
| Other                   | 14 (1.6)            | 1 (0.6)             | 3 (2.4)              | 14 (1.6)                             | 3 (1.3)                            | 8 (3.6)                            | 11 (3.0)         |
| Charlson score, n (%)   |                     |                     |                      |                                      |                                    |                                    |                  |
| 0                       | 338 (38.1)          | 47 (29.7)           | 30 (24.2)            | 387 (45.3)                           | 106 (47.3)                         | 74 (33.3)                          | 143 (38.9)       |
| 1                       | 204 (23.0)          | 35 (22.2)           | 19 (15.3)            | 171 (20.0)                           | 55 (24.6)                          | 50 (22.5)                          | 92 (25.0)        |
| 2+                      | 345 (38.9)          | 76 (48.1)           | 75 (60.5)            | 296 (34.7)                           | 63 (28.1)                          | 98 (44.1)                          | 133 (36.1)       |

|                                             |            |            |            |            |            |            |            |
|---------------------------------------------|------------|------------|------------|------------|------------|------------|------------|
| Charlson score, median (IQR)                | 1 (0-3)    | 1 (0-3)    | 2 (1-4)    | 1 (0-2)    | 1 (0-2)    | 1 (0-3)    | 1 (0-2)    |
| Admission SOFA score, median (IQR)          | 6 (4-8)    | 8 (5-10)   | 8 (5-10)   | 6 (4-9)    | 7 (5-9)    | 9 (6-11)   | 8 (5-11)   |
| Admission APACHE II score, median (IQR)     | 18 (14-23) | 20 (15-26) | 23 (16-28) | 17 (12-22) | 20 (14-25) | 22 (16-29) | 21 (14-26) |
| Vasoactive medications, n (%)               | 356 (40.1) | 105 (66.5) | 81 (65.3)  | 477 (55.9) | 117 (52.2) | 175 (78.8) | 263 (71.5) |
| Continuous renal replacement therapy, n (%) | 35 (3.9)   | 10 (6.3)   | 9 (7.3)    | 41 (4.8)   | 7 (3.1)    | 32 (14.4)  | 36 (9.8)   |

STROBE Statement—Checklist of items that should be included in reports of *cohort studies*

|                              | Item No | Recommendation                                                                                                                                                                                                                                                                                                         | Page No                     |
|------------------------------|---------|------------------------------------------------------------------------------------------------------------------------------------------------------------------------------------------------------------------------------------------------------------------------------------------------------------------------|-----------------------------|
| <b>Title and abstract</b>    | 1       | (a) Indicate the study's design with a commonly used term in the title or the abstract<br>(b) Provide in the abstract an informative and balanced summary of what was done and what was found                                                                                                                          | 1, 2                        |
| <b>Introduction</b>          |         |                                                                                                                                                                                                                                                                                                                        |                             |
| Background/rationale         | 2       | Explain the scientific background and rationale for the investigation being reported                                                                                                                                                                                                                                   | 3                           |
| Objectives                   | 3       | State specific objectives, including any prespecified hypotheses                                                                                                                                                                                                                                                       | 3                           |
| <b>Methods</b>               |         |                                                                                                                                                                                                                                                                                                                        |                             |
| Study design                 | 4       | Present key elements of study design early in the paper                                                                                                                                                                                                                                                                | 4                           |
| Setting                      | 5       | Describe the setting, locations, and relevant dates, including periods of recruitment, exposure, follow-up, and data collection                                                                                                                                                                                        | 4                           |
| Participants                 | 6       | (a) Give the eligibility criteria, and the sources and methods of selection of participants. Describe methods of follow-up<br>(b) For matched studies, give matching criteria and number of exposed and unexposed                                                                                                      | 4                           |
| Variables                    | 7       | Clearly define all outcomes, exposures, predictors, potential confounders, and effect modifiers. Give diagnostic criteria, if applicable                                                                                                                                                                               | 5,6                         |
| Data sources/<br>measurement | 8*      | For each variable of interest, give sources of data and details of methods of assessment (measurement). Describe comparability of assessment methods if there is more than one group                                                                                                                                   | 4, 6                        |
| Bias                         | 9       | Describe any efforts to address potential sources of bias                                                                                                                                                                                                                                                              | 6                           |
| Study size                   | 10      | Explain how the study size was arrived at                                                                                                                                                                                                                                                                              | 5                           |
| Quantitative variables       | 11      | Explain how quantitative variables were handled in the analyses. If applicable, describe which groupings were chosen and why                                                                                                                                                                                           | 4,6                         |
| Statistical methods          | 12      | (a) Describe all statistical methods, including those used to control for confounding<br>(b) Describe any methods used to examine subgroups and interactions<br>(c) Explain how missing data were addressed<br>(d) If applicable, explain how loss to follow-up was addressed<br>(e) Describe any sensitivity analyses | 6,<br>Supplement<br>methods |
| <b>Results</b>               |         |                                                                                                                                                                                                                                                                                                                        |                             |
| Participants                 | 13*     | (a) Report numbers of individuals at each stage of study—eg numbers potentially eligible, examined for eligibility, confirmed eligible, included in the study, completing follow-up, and analysed<br>(b) Give reasons for non-participation at each stage<br>(c) Consider use of a flow diagram                        | 7,<br>Figure 1              |
| Descriptive data             | 14*     | (a) Give characteristics of study participants (eg demographic, clinical, social) and information on exposures and potential confounders<br>(b) Indicate number of participants with missing data for each variable of interest<br>(c) Summarise follow-up time (eg, average and total amount)                         | 4, 7<br>Table 1             |
| Outcome data                 | 15*     | Report numbers of outcome events or summary measures over time                                                                                                                                                                                                                                                         | 7<br>Table 2, 3,            |

1  
2  
3  
4  
5  
6  
7  
8  
9  
10  
11  
12  
13  
14  
15  
16  
17  
18  
19  
20  
21  
22  
23  
24  
25  
26  
27  
28  
29  
30  
31  
32  
33  
34  
35  
36  
37  
38  
39  
40  
41  
42  
43  
44  
45  
46  
47  
48  
49  
50  
51  
52  
53  
54  
55  
56  
57  
58  
59  
60

For peer review only



|    |                          |    |                                                                                                                                                                                                              |           |
|----|--------------------------|----|--------------------------------------------------------------------------------------------------------------------------------------------------------------------------------------------------------------|-----------|
| 1  | Main results             | 16 | (a) Give unadjusted estimates and, if applicable, confounder-adjusted estimates and their precision (eg, 95% confidence interval). Make clear which confounders were adjusted for and why they were included | Table 2,3 |
| 2  |                          |    | (b) Report category boundaries when continuous variables were categorized                                                                                                                                    |           |
| 3  |                          |    | (c) If relevant, consider translating estimates of relative risk into absolute risk for a meaningful time period                                                                                             |           |
| 4  | Other analyses           | 17 | Report other analyses done—eg analyses of subgroups and interactions, and sensitivity analyses                                                                                                               | 7         |
| 5  | <b>Discussion</b>        |    |                                                                                                                                                                                                              |           |
| 6  | Key results              | 18 | Summarise key results with reference to study objectives                                                                                                                                                     | 8         |
| 7  | Limitations              | 19 | Discuss limitations of the study, taking into account sources of potential bias or imprecision. Discuss both direction and magnitude of any potential bias                                                   | 10        |
| 8  | Interpretation           | 20 | Give a cautious overall interpretation of results considering objectives, limitations, multiplicity of analyses, results from similar studies, and other relevant evidence                                   | 8,9,10    |
| 9  | Generalisability         | 21 | Discuss the generalisability (external validity) of the study results                                                                                                                                        | 8,9,10    |
| 10 | <b>Other information</b> |    |                                                                                                                                                                                                              |           |
| 11 | Funding                  | 22 | Give the source of funding and the role of the funders for the present study and, if applicable, for the original study on which the present article is based                                                | 11        |

\*Give information separately for exposed and unexposed groups.

**Note:** An Explanation and Elaboration article discusses each checklist item and gives methodological background and published examples of transparent reporting. The STROBE checklist is best used in conjunction with this article (freely available on the Web sites of PLoS Medicine at <http://www.plosmedicine.org/>, Annals of Internal Medicine at <http://www.annals.org/>, and Epidemiology at <http://www.epidem.com/>). Information on the STROBE Initiative is available at <http://www.strobe-statement.org>.
