# Supplementary material for: Sedation strategy and ICU delirium: a multicentre, population-based propensity score-matched cohort study
Source: PubMed Central journal article supplement — BMJ Open. 2021 Jul 20;11(7):e045087. doi: 10.1136/bmjopen-2020-045087 (PMC8292822; doi:10.1136/bmjopen-2020-045087), 2021-07-20
Supplement: bmjopen-2020-045087supp001.pdf [file bmjopen-2020-045087supp001.pdf]

**Table S1: Secondary outcomes by sedation strategy prior to first ICDS assessment**

| <b>Propensity score-matched mean ratio or rate ratio (95% CI)<sup>1</sup></b> | <b>ICU LOS</b>          | <b>Hospital LOS</b>     | <b>Duration of invasive ventilation</b> | <b>Number of delirium days</b> |
|-------------------------------------------------------------------------------|-------------------------|-------------------------|-----------------------------------------|--------------------------------|
| Sedation prior to first ICDS assessment                                       |                         |                         |                                         |                                |
| Propofol                                                                      | 1.00 (reference group)  | 1.00 (reference group)  | 1.00 (reference group)                  | 1.00 (reference group)         |
| Fentanyl                                                                      | 1.06 (0.85-1.33)        | 1.25 (0.97-1.61)        | 1.00 (0.74-1.35)                        | 1.03 (0.69-1.55)               |
| Midazolam                                                                     | 0.83 (0.65-1.06)        | 0.98 (0.75-1.28)        | 1.00 (0.73-1.38)                        | 0.88 (0.59-1.31)               |
| Propofol + Fentanyl                                                           | <b>1.17 (1.05-1.30)</b> | <b>1.20 (1.05-1.38)</b> | <b>1.37 (1.18-1.58)</b>                 | 1.08 (0.90-1.31)               |
| Propofol + Midazolam                                                          | 1.16 (0.99-1.36)        | 0.86 (0.68-1.08)        | <b>1.59 (1.28-1.99)</b>                 | 1.11 (0.87-1.41)               |
| Fentanyl + Midazolam                                                          | <b>1.40 (1.17-1.67)</b> | <b>1.27 (1.02-1.57)</b> | <b>1.95 (1.54-2.46)</b>                 | 1.28 (0.97-1.69)               |
| All 3                                                                         | <b>1.73 (1.52-1.98)</b> | <b>1.39 (1.18-1.63)</b> | <b>2.47 (2.06-2.97)</b>                 | <b>1.35 (1.10-1.67)</b>        |

<sup>1</sup>Propensity score based on age, sex, admission class, Charlson comorbidity category (0, 1, 2+), admission APACHE II score, vasoactive medications, continuous renal replacement therapy. 1:1 nearest-neighbor matching without replacement using the logit of the propensity score and specified caliper width equal to 0.2 of the standard deviation of the logit of the propensity score
