# Supplementary material for: Sedation strategy and ICU delirium: a multicentre, population-based propensity score-matched cohort study
Source: PubMed Central journal article supplement — BMJ Open. 2021 Jul 20;11(7):e045087. doi: 10.1136/bmjopen-2020-045087 (PMC8292822; doi:10.1136/bmjopen-2020-045087), 2021-07-20
Supplement: bmjopen-2020-045087supp002.pdf [file bmjopen-2020-045087supp002.pdf]

**Table S2: Propensity score matched models of the relationship between mortality outcomes and dominant sedation strategy prior to first ICDSC assessment**

| <b>Outcome</b>                                | <b>Dominant Sedation Strategy</b> | <b>Mortality, n (%)</b> | <b>Propensity score-matched OR (95% CI)<sup>2</sup></b> |
|-----------------------------------------------|-----------------------------------|-------------------------|---------------------------------------------------------|
| <b>ICU Mortality</b>                          | Propofol                          | 94 (6.7)                | 1.00 (reference)                                        |
|                                               | Fentanyl                          | 104 (9.7)               | <b>1.50 (1.07-2.12)</b>                                 |
|                                               | Midazolam                         | 39 (11.0)               | 1.20 (0.74-1.97)                                        |
| <b>Hospital Mortality</b>                     | Propofol                          | 157 (11.1)              | 1.00 (reference)                                        |
|                                               | Fentanyl                          | 166 (15.5)              | 1.27 (0.97-1.67)                                        |
|                                               | Midazolam                         | 59 (16.6)               | 1.14 (0.76-1.70)                                        |
| <b>Died within 30 days of ICU admission</b>   | Propofol                          | 148 (10.5)              | 1.00 (reference)                                        |
|                                               | Fentanyl                          | 148 (13.8)              | <b>1.35 (1.02-1.79)</b>                                 |
|                                               | Midazolam                         | 50 (14.0)               | 1.02 (0.67-1.57)                                        |
| <b>Died within 1 year of ICU admission</b>    | Propofol                          | 268 (19.0)              | 1.00 (reference)                                        |
|                                               | Fentanyl                          | 248 (23.2)              | 1.13 (0.90-1.43)                                        |
|                                               | Midazolam                         | 91 (25.6)               | 1.01 (0.72-1.42)                                        |
| <b>Died within 1.5 years of ICU admission</b> | Propofol                          | 308 (21.8)              | 1.00 (reference)                                        |
|                                               | Fentanyl                          | 276 (25.8)              | 1.12 (0.90-1.40)                                        |
|                                               | Midazolam                         | 109 (30.6)              | 1.01 (0.74-1.39)                                        |
