# Supplementary material for: Sedation strategy and ICU delirium: a multicentre, population-based propensity score-matched cohort study
Source: PubMed Central journal article supplement — BMJ Open. 2021 Jul 20;11(7):e045087. doi: 10.1136/bmjopen-2020-045087 (PMC8292822; doi:10.1136/bmjopen-2020-045087), 2021-07-20
Supplement: bmjopen-2020-045087supp003.pdf [file bmjopen-2020-045087supp003.pdf]

Supplementary Table 3: Table of baseline characteristics for sensitivity analyses

|                         | Propofol<br>(n=887) | Fentanyl<br>(n=158) | Midazolam<br>(n=124) | Propofol<br>+<br>Fentanyl<br>(n=854) | Propofol +<br>Midazolam<br>(n=224) | Fentanyl +<br>Midazolam<br>(n=222) | All 3<br>(n=368) |
|-------------------------|---------------------|---------------------|----------------------|--------------------------------------|------------------------------------|------------------------------------|------------------|
| <b>Characteristic</b>   |                     |                     |                      |                                      |                                    |                                    |                  |
| Age, median (IQR)       | 58 (46-69)          | 64 (54-74)          | 66 (54-74)           | 55 (40-67)                           | 51 (35-60)                         | 61 (51-71)                         | 52 (40-65)       |
| Male, n (%)             | 506 (57.0)          | 79 (50.0)           | 79 (63.7)            | 532 (62.3)                           | 145 (64.7)                         | 133 (59.9)                         | 248 (67.4)       |
| Admission reason, n (%) |                     |                     |                      |                                      |                                    |                                    |                  |
| Medical                 | 518 (58.5)          | 59 (37.3)           | 87 (70.2)            | 236 (27.7)                           | 176 (78.6)                         | 121 (54.5)                         | 232 (63.0)       |
| Surgical                | 163 (18.4)          | 72 (45.6)           | 30 (24.2)            | 299 (35.1)                           | 7 (3.1)                            | 81 (36.5)                          | 87 (23.6)        |
| Neurological            | 169 (19.1)          | 10 (6.3)            | 6 (4.8)              | 102 (12.0)                           | 37 (16.5)                          | 3 (1.4)                            | 10 (2.7)         |
| Trauma                  | 35 (4.0)            | 17 (10.8)           | 1 (0.8)              | 216 (25.3)                           | 4 (1.8)                            | 17 (7.7)                           | 39 (10.6)        |
| Location admitted from  |                     |                     |                      |                                      |                                    |                                    |                  |
| Emergency Room          | 520 (58.6)          | 53 (33.5)           | 49 (39.5)            | 367 (43.0)                           | 168 (75.0)                         | 93 (41.9)                          | 186 (50.5)       |
| Operating Room/Recovery | 170 (19.2)          | 62 (39.2)           | 27 (21.8)            | 320 (37.5)                           | 6 (2.7)                            | 65 (29.3)                          | 86 (23.4)        |
| Hospital Ward           | 166 (18.7)          | 39 (24.7)           | 43 (34.7)            | 140 (16.4)                           | 40 (17.9)                          | 49 (22.1)                          | 77 (20.9)        |
| Another Hospital        | 17 (1.9)            | 3 (1.9)             | 2 (1.6)              | 13 (1.5)                             | 7 (3.1)                            | 7 (3.2)                            | 8 (2.2)          |
| Other                   | 14 (1.6)            | 1 (0.6)             | 3 (2.4)              | 14 (1.6)                             | 3 (1.3)                            | 8 (3.6)                            | 11 (3.0)         |
| Charlson score, n (%)   |                     |                     |                      |                                      |                                    |                                    |                  |
| 0                       | 338 (38.1)          | 47 (29.7)           | 30 (24.2)            | 387 (45.3)                           | 106 (47.3)                         | 74 (33.3)                          | 143 (38.9)       |
| 1                       | 204 (23.0)          | 35 (22.2)           | 19 (15.3)            | 171 (20.0)                           | 55 (24.6)                          | 50 (22.5)                          | 92 (25.0)        |
| 2+                      | 345 (38.9)          | 76 (48.1)           | 75 (60.5)            | 296 (34.7)                           | 63 (28.1)                          | 98 (44.1)                          | 133 (36.1)       |

|                                             |            |            |            |            |            |            |            |
|---------------------------------------------|------------|------------|------------|------------|------------|------------|------------|
| Charlson score, median (IQR)                | 1 (0-3)    | 1 (0-3)    | 2 (1-4)    | 1 (0-2)    | 1 (0-2)    | 1 (0-3)    | 1 (0-2)    |
| Admission SOFA score, median (IQR)          | 6 (4-8)    | 8 (5-10)   | 8 (5-10)   | 6 (4-9)    | 7 (5-9)    | 9 (6-11)   | 8 (5-11)   |
| Admission APACHE II score, median (IQR)     | 18 (14-23) | 20 (15-26) | 23 (16-28) | 17 (12-22) | 20 (14-25) | 22 (16-29) | 21 (14-26) |
| Vasoactive medications, n (%)               | 356 (40.1) | 105 (66.5) | 81 (65.3)  | 477 (55.9) | 117 (52.2) | 175 (78.8) | 263 (71.5) |
| Continuous renal replacement therapy, n (%) | 35 (3.9)   | 10 (6.3)   | 9 (7.3)    | 41 (4.8)   | 7 (3.1)    | 32 (14.4)  | 36 (9.8)   |
